# Supplementary material for: Chinese herbal medicine for diabetic kidney disease: a systematic review and meta-analysis of randomised placebo-controlled trials
Source: PubMed Central journal article supplement — BMJ Open. 2019 May 1;9(4):e025653. doi: 10.1136/bmjopen-2018-025653 (PMC6501976; doi:10.1136/bmjopen-2018-025653), 2019-05-01
Supplement: bmjopen-2018-025653.draft_revisions.pdf [file bmjopen-2018-025653.draft_revisions.pdf]

# BMJ Open

BMJ Open is committed to open peer review. As part of this commitment we make the peer review history of every article we publish publicly available.

When an article is published we post the peer reviewers' comments and the authors' responses online. We also post the versions of the paper that were used during peer review. These are the versions that the peer review comments apply to.

The versions of the paper that follow are the versions that were submitted during the peer review process. They are not the versions of record or the final published versions. They should not be cited or distributed as the published version of this manuscript.

BMJ Open is an open access journal and the full, final, typeset and author-corrected version of record of the manuscript is available on our site with no access controls, subscription charges or pay-per-view fees (<http://bmjopen.bmj.com>).

If you have any questions on BMJ Open's open peer review process please email [editorial.bmjopen@bmj.com](mailto:editorial.bmjopen@bmj.com)

# BMJ Open

## Chinese Herbal Medicine for Diabetic Kidney Disease: A Systematic Review and Meta-analysis of Randomised Placebo-controlled Trials

|                               |                                                                                                                                                                                                                                                                                                                                                                                                                                                                                                                                                                                                                                                                                                                                                                                                                                                                                                                                                                                                                                                                                                                                                                                                                                                                                                                                                                                                                                                                                                                                                                                                                                                                                                                                                                                                                                                                                                                                                                                                                                                                                                                                                                                                                                                                                                                                                                                                    |
|-------------------------------|----------------------------------------------------------------------------------------------------------------------------------------------------------------------------------------------------------------------------------------------------------------------------------------------------------------------------------------------------------------------------------------------------------------------------------------------------------------------------------------------------------------------------------------------------------------------------------------------------------------------------------------------------------------------------------------------------------------------------------------------------------------------------------------------------------------------------------------------------------------------------------------------------------------------------------------------------------------------------------------------------------------------------------------------------------------------------------------------------------------------------------------------------------------------------------------------------------------------------------------------------------------------------------------------------------------------------------------------------------------------------------------------------------------------------------------------------------------------------------------------------------------------------------------------------------------------------------------------------------------------------------------------------------------------------------------------------------------------------------------------------------------------------------------------------------------------------------------------------------------------------------------------------------------------------------------------------------------------------------------------------------------------------------------------------------------------------------------------------------------------------------------------------------------------------------------------------------------------------------------------------------------------------------------------------------------------------------------------------------------------------------------------------|
| Journal:                      | <i>BMJ Open</i>                                                                                                                                                                                                                                                                                                                                                                                                                                                                                                                                                                                                                                                                                                                                                                                                                                                                                                                                                                                                                                                                                                                                                                                                                                                                                                                                                                                                                                                                                                                                                                                                                                                                                                                                                                                                                                                                                                                                                                                                                                                                                                                                                                                                                                                                                                                                                                                    |
| Manuscript ID                 | bmjopen-2018-025653                                                                                                                                                                                                                                                                                                                                                                                                                                                                                                                                                                                                                                                                                                                                                                                                                                                                                                                                                                                                                                                                                                                                                                                                                                                                                                                                                                                                                                                                                                                                                                                                                                                                                                                                                                                                                                                                                                                                                                                                                                                                                                                                                                                                                                                                                                                                                                                |
| Article Type:                 | Research                                                                                                                                                                                                                                                                                                                                                                                                                                                                                                                                                                                                                                                                                                                                                                                                                                                                                                                                                                                                                                                                                                                                                                                                                                                                                                                                                                                                                                                                                                                                                                                                                                                                                                                                                                                                                                                                                                                                                                                                                                                                                                                                                                                                                                                                                                                                                                                           |
| Date Submitted by the Author: | 31-Jul-2018                                                                                                                                                                                                                                                                                                                                                                                                                                                                                                                                                                                                                                                                                                                                                                                                                                                                                                                                                                                                                                                                                                                                                                                                                                                                                                                                                                                                                                                                                                                                                                                                                                                                                                                                                                                                                                                                                                                                                                                                                                                                                                                                                                                                                                                                                                                                                                                        |
| Complete List of Authors:     | <p>Zhang, La; Guangdong Provincial Hospital of Chinese Medicine, Guangdong Provincial Academy of Chinese Medical Sciences, and the Second Affiliated Hospital of Guangzhou University of Chinese Medicine, Nephrology Department; RMIT University, The China-Australia International Research Centre for Chinese Medicine</p> <p>Yang, Lihong; Guangdong Provincial Hospital of Chinese Medicine, Guangdong Provincial Academy of Chinese Medical Sciences, and the Second Affiliated Hospital of Guangzhou University of Chinese Medicine, Evidencebased Medicine and Clinical Research Service Group; RMIT University, The China-Australia International Research Centre for Chinese Medicine</p> <p>Shergis, Johannah; RMIT University,</p> <p>Zhang, Lei; Guangdong Provincial Hospital of Chinese Medicine, Guangdong Provincial Academy of Chinese Medical Sciences, and the Second Affiliated Hospital of Guangzhou University of Chinese Medicine, Nephrology Department</p> <p>Zhang, Anthony; RMIT University, Health Sciences</p> <p>Guo, Xinfeng; Guangdong Provincial Hospital of Chinese Medicine, Guangdong Provincial Academy of Chinese Medical Sciences, and the Second Affiliated Hospital of Guangzhou University of Chinese Medicine, Evidencebased Medicine and Clinical Research Service Group; RMIT University, The China-Australia International Research Centre for Chinese Medicine</p> <p>Qin, Xindong; Guangdong Provincial Hospital of Chinese Medicine, Guangdong Provincial Academy of Chinese Medical Sciences, and the Second Affiliated Hospital of Guangzhou University of Chinese Medicine, Nephrology Department</p> <p>Johnson, David; University of Queensland, Australia Kidney Trials Network; Translational Research Institute</p> <p>Liu, Xusheng; Guangdong Provincial Hospital of Chinese Medicine, Guangdong Provincial Academy of Chinese Medical Sciences, and the Second Affiliated Hospital of Guangzhou University of Chinese Medicine, Nephrology Department</p> <p>Lu, Chuan-jian ; Guangdong Provincial Hospital of Chinese Medicine, Guangdong Provincial Academy of Chinese Medical Sciences, and the Second Affiliated Hospital of Guangzhou University of Chinese Medicine; Guangdong Provincial Key Laboratory of Clinical Research on Traditional Chinese Medicine Syndrome</p> <p>Xue, Charlie; RMIT University, Health Sciences</p> |

1  
2  
3  
4  
5  
6  
7  
8  
9  
10  
11  
12  
13  
14  
15  
16  
17  
18  
19  
20  
21  
22  
23  
24  
25  
26  
27  
28  
29  
30  
31  
32  
33  
34  
35  
36  
37  
38  
39  
40  
41  
42  
43  
44  
45  
46  
47  
48  
49  
50  
51  
52  
53  
54  
55  
56  
57  
58  
59  
60

|           |                                                                                                                                                                                                                              |
|-----------|------------------------------------------------------------------------------------------------------------------------------------------------------------------------------------------------------------------------------|
|           | Mao, Wei; Guangdong Provincial Hospital of Chinese Medicine, Guangdong Provincial Academy of Chinese Medical Sciences, and the Second Affiliated Hospital of Guangzhou University of Chinese Medicine, Nephrology Department |
| Keywords: | diabetic kidney disease, Chinese herbal medicine, complementary and alternative medicine, systematic review, meta-analysis                                                                                                   |
|           |                                                                                                                                                                                                                              |

SCHOLARONE™  
Manuscripts

For peer review only

## Title

### Chinese Herbal Medicine for Diabetic Kidney Disease: A Systematic Review and Meta-analysis of Randomised Placebo-controlled Trials

## Authors<sup>1</sup>

La Zhang, M.Med., <sup>1,2</sup> Lihong Yang, M.Med., <sup>1,2</sup> Johannah Shergis, Ph.D., <sup>2</sup> Lei Zhang, M.D., <sup>1</sup> Anthony Lin Zhang, Ph.D., <sup>2</sup> Xinfeng Guo, M.D., <sup>1,2</sup> Xindong Qin, M.Med., <sup>1</sup> David Johnson, Ph.D., <sup>3-5</sup> Xusheng Liu, M.Med., <sup>1</sup> Chuanjian Lu, M.D., <sup>1,6</sup> Charlie Changli Xue, Ph.D., <sup>2</sup> Wei Mao, M.D. <sup>1</sup>

1. Guangdong Provincial Hospital of Chinese Medicine, Guangdong Provincial Academy of Chinese Medical Sciences, and the Second Affiliated Hospital of Guangzhou University of Chinese Medicine, Guangzhou, China
2. The China-Australia International Research Centre for Chinese Medicine, School of Health and Biomedical Sciences, Royal Melbourne Institute of Technology, Melbourne, Australia
3. Australia Kidney Trials Network, University of Queensland, Brisbane, Australia
4. Department of Nephrology, Princess Alexandra Hospital, Brisbane, Australia
5. Translational Research Institute, Brisbane, Australia
6. Guangdong Provincial Key Laboratory of Clinical Research on Traditional Chinese Medicine Syndrome, Guangzhou, China

## Corresponding Authors<sup>2</sup>

Charlie Changli Xue, Ph.D.

Email: [charlie.xue@rmit.edu.au](mailto:charlie.xue@rmit.edu.au)

Phone: +613 9925 7360

Fax: +613 9925 6539

Address: RMIT University, PO Box 71, Bundoora, Vic. 3083, Australia

## Word counts

Abstract: 300 words

Manuscript body: 4,495 words

---

<sup>1</sup> La Zhang and Lihong Yang contributed equally to this paper.

<sup>2</sup> Charlie Changli Xue and Wei Mao contributed equally to this paper.

## ABSTRACT

### Objectives

To provide a broad evaluation of the efficacy and safety of oral Chinese herbal medicine (CHM) as an adjunctive treatment for diabetic kidney disease (DKD), including mortality, progression to end stage renal disease (ESKD), albuminuria, proteinuria and kidney function.

### Design

A systematic review and meta-analysis.

### Methods

Randomised controlled trials (RCTs) comparing oral CHM with placebo as an additional intervention to conventional treatments were retrieved from five English (CENTRAL, MEDLINE, Embase, AMED and CINAHL) and four Chinese databases (CBM, CNKI, CQVIP and Wanfang) from inception to May 2018. RCTs recruiting adult DKD patients induced by primary diabetes were considered eligible, regardless of the form and ingredients of oral CHM. Mean difference (MD) or standardized mean difference (SMD) was used to analyze continuous variables and risk ratio (RR) for dichotomous data, both with 95% confidence intervals (CIs).

### Results

From 7,255 reports retrieved, 20 eligible studies involving 2,719 DKD patients were included. CHM was associated with greater reduction of albuminuria than placebo, regardless of whether angiotensin converting enzyme inhibitors (ACEi) or angiotensin receptor blockers (ARB) were concurrently administered (SMD -0.56, 95%CI [-1.04,

1  
2  
3 -0.08],  $P=0.002$ ) or not (SMD -0.92, 95%CI [-1.35, -0.51],  $P<0.0001$ ). When CHM  
4  
5 was used as an adjunct to ACEi/ARB, serum creatinine was lower (MD, -4.02  $\mu\text{mol/L}$ ;  
6  
7 95%CI [-7.81, -0.23],  $P=0.15$ ) and glomerular filtration rate was improved (MD, 5.8  
8  
9 mL/min; 95%CI [2.42, 10.14],  $P=0.001$ ) in the CHM group than placebo group. The  
10  
11 effects of CHM on progression to ESKD and mortality were uncertain due to low  
12  
13 event rates. CHM appeared to be well-tolerated, with low reported rates of adverse  
14  
15 events.  
16  
17  
18  
19

## 20 **Conclusions**

21  
22 With moderate to low quality evidence, CHM may have beneficial effects on renal  
23  
24 function and albuminuria beyond that afforded by conventional treatment in adults  
25  
26 with DKD. Further well-conducted, adequately powered trials are warranted to  
27  
28 confirm the long-term effect of CHM.  
29  
30  
31  
32  
33  
34

35 **PROSPERO registration number:** CRD42015029293  
36  
37  
38  
39

40 **Index words:** diabetic kidney disease (DKD); Chinese herbal medicine (CHM);  
41  
42 complementary and alternative medicine; systematic review; meta-analysis  
43  
44  
45  
46  
47  
48  
49  
50  
51  
52  
53  
54  
55  
56  
57  
58  
59  
60

## ARTICLE SUMMARY

### Strengths and limitations of this study

- This systematic review and meta-analysis provided a broad review of the efficacy and safety of oral Chinese herbal medicine for diabetic kidney disease, with patient-oriented outcomes such as mortality, progression to ESKD and quality of life.
- Only randomised controlled trials applied matched placebo to achieve blinding were included, to avoid potential risk of performance bias which may exaggerate the CHM effect.
- The search strategy was comprehensive and over 7,000 articles were screened, as a result 20 studies with a large total sample size of 2,719 participants were collected.
- A priori subgroups analysis was planned and completed to provide potential candidate formulae and frequently used herbs for further investigation.
- The overall quality of evidence was moderate to very low mainly due to unclear randomization procedures, wide confidence interval and heterogeneity in outcome measures.

## INTRODUCTION

Diabetic kidney disease (DKD) is one of the most common complications of diabetes.

As the prevalence of diabetes continues to grow globally, it is estimated that the number of DKD patients will double by 2025.<sup>1</sup> Since patients with DKD are at markedly higher risks of progression to end stage kidney disease (ESKD) and cardiovascular disease (CVD), the socioeconomic and public health burden of DKD is significant.<sup>2, 3</sup> Effective therapies in preventing and treating DKD are therefore of critical importance.

Risk factor management, including glycemic and blood pressure control, is one of the mainstays of treatment of DKD and has been successful in reducing its progression and complications.<sup>4, 5</sup> However, such treatments have only been partially successful. Moreover, the optimal interventions for these risk factors remain unclear, including the appropriate choice of anti-diabetic agents, and the optimal targets for glycemic and blood pressure levels for various subgroups. Renin-angiotensin system (RAS) blockade is partially effective in reducing the progression and complications of DKD in those with increased albuminuria excretion, although its role is less certain in those with deteriorating glomerular filtration rate (GFR) without albuminuria.<sup>6-8</sup> Some promising therapies addressing novel targets, such as sulodexide and bardoxolone methyl, have been found to be ineffective and/or harmful, whilst several others, including mineralocorticoid receptor antagonist and phosphodiesterase inhibitors, are still under evaluation.<sup>9-11</sup>

To facilitate the discovery of new therapeutic agents for patients with diabetes and



1  
2  
3 impaired renal function, screening candidates from natural products including Chinese  
4 herbal medicine (CHM) which have been traditionally used for symptoms associated  
5  
6 with this indication, may offer insights into a more targeted approach for therapeutic  
7  
8 development. With respect to CHM, relevant records of treatment of DKD symptoms  
9  
10 in Chinese classical literature date back to the *Han* dynasty (AD 202–220) and it has  
11  
12 evolved to contemporary literature including RCTs concerning the use of CHM for  
13  
14 diabetes and its complications.<sup>12</sup> Some herbal formulae and manufactured medicines  
15  
16 have been recommended for patients with DKD in the clinical practice guidelines of  
17  
18 Chinese Medicine.<sup>13-15</sup> However, these guidelines were based on experts' consensus  
19  
20 rather than outcomes of systematically evaluated best available clinical evidence.  
21  
22 Moreover, safety concerns existed due to the potential for aristolochic-acid  
23  
24 nephrotoxicity with some herbal products.<sup>6, 16</sup> Even though legislation and quality  
25  
26 control have been reinforced in recent years, the general lacks of information  
27  
28 regarding the safety profiles of some herbal formulae due to their multi-compound  
29  
30 nature have limited their application.<sup>6, 17</sup>

31  
32  
33 In recent years, there have been a growing number of clinical trials of CHM and  
34  
35 related systematic reviews of CHM as adjunctive treatment for DKD. Unfortunately,  
36  
37 most of these systematic reviews included original studies lack of blinding and  
38  
39 focusing on specific CHM formulae, with poor report completeness.<sup>18</sup> As unmasking  
40  
41 was associated with exaggeration of intervention effects,<sup>19</sup> we therefore undertook a  
42  
43 systematic review and meta-analysis of randomized, placebo-controlled trials to  
44  
45 evaluate the efficacy and safety of oral CHM as adjunctive treatment for DKD.  
46  
47  
48  
49  
50  
51  
52  
53  
54  
55  
56  
57  
58  
59  
60

## METHODS

This systematic review was conducted followed the Cochrane handbook of systematic reviews of interventions and reported in accord with the PRISMA guidelines.<sup>20, 21</sup> The protocol was registered in the PROSPERO database and can be accessed online (Registry number: CRD42015029293).

### Search Strategy

A comprehensive search was conducted in the following databases irrespective of publication status or language: MEDLINE, EMBASE, Cumulative Index of Nursing and Allied Health Literature (CINAHL), Cochrane Central Register of Controlled Trials (CENTRAL), Allied and Complementary Medicine Database (AMED), China BioMedical Literature (CBM), China National Knowledge Infrastructure (CNKI), Chongqing VIP (CQVIP) and Wanfang. The former five databases were in English while the later four were in Chinese. Databases were searched from inception to May 2018. The U.S.A. National Institutes of Health register (ClinicalTrials.gov), the Australian New Zealand Clinical Trial Registry (ANZCTR), the Chinese Clinical Trial Registry (ChiCTR), and the European Union Clinical Trials Register (EU-CTR) were searched for completed but unpublished trials. Further, reference lists of related systematic reviews were reviewed for additional publications.

Search terms included “diabetic nephropathy”, “diabetic kidney disease”, “albuminuria”, “Traditional Chinese Medicine”, “randomized controlled trial” and their synonyms. All terms were mapped to controlled vocabulary (where applicable) in addition to being searched as keywords. A sample of search strategy of MEDLINE

has been provided (Table S1).

### **Eligibility criteria**

Eligible studies had to fulfill the following criteria: (1) randomized controlled trial design; (2) included primary diabetes adults with persistent increased albuminuria/proteinuria excretion, which was defined as an albumin excretion rate (AER) more than 20 µg/min, an albumin-to-creatinine ratio (ACR) larger than 30 mg/g or 24-hour proteinuria over 0.5 g/d;<sup>6,7</sup> (3) intervention was oral Chinese herbal medicine, which could have been either single or multiple ingredients in any form (decoction, granules, capsules etc.); (4) CHM matched placebo was applied in the control group; (5) both intervention and control groups received the same conventional treatments of DKD, including comprehensive management of glycaemia, blood pressure, serum lipid level, life-style and nutrition in accordance with Kidney Disease Outcomes Quality Initiative (KDOQI) clinical practice guidelines' recommendation;<sup>6,7</sup> and, (6) the study reported at least one of the primary outcomes. Studies including patients with albuminuria that was not caused by diabetes, patients who already had ESKD, or those receiving renal replacement therapy were excluded.

### **Outcomes of Interest**

Primary outcomes of interest included albuminuria/proteinuria, kidney function, number of participants progressing to ESKD, all-cause mortality and adverse events, at the end of treatment or follow-up. Progression to ESKD was defined as initiation of renal replacement therapy or estimated GFR (eGFR) lower than 15 mL/min/1.73m<sup>2</sup>. Kidney function was reflected by the measurement of serum creatinine concentration

1  
2  
3 (Scr) and glomerulus filtration rate (GFR). Likewise, quantitative measurement of  
4  
5 albuminuria and proteinuria included urinary albumin excretion rate (AER),  
6  
7 albumin-to-creatinine ratio (ACR), 24-hour urine protein excretion (UP) and  
8  
9 protein-to-creatinine ratio (PCR).  
10  
11

12  
13 Secondary outcomes included cardiovascular mortality, all-cause hospitalization,  
14  
15 quality of life measured by validated scales, indicators of risk factor control (such as  
16  
17 fasting blood glucose, glycated haemoglobin [HbA1c], blood pressure, total  
18  
19 cholesterol, triglycerides, low-density lipoprotein cholesterol [LDL-C], and  
20  
21 high-density lipoprotein cholesterol [HDL-C]). All outcomes were reported with  
22  
23 specified units at the end of treatment or at the end of follow-up.  
24  
25

26  
27 Safety outcomes included numbers of any adverse events and serious adverse events  
28  
29 during the study period.  
30  
31

### 32 33 **Study Selection and Data Extraction**

34  
35 Titles and abstracts identified in searching were screened by one reviewer and then  
36  
37 checked by another investigator (L.Z. and X.Q.) against the predefined criteria. After  
38  
39 titles and abstracts screening, possibly relevant studies underwent full-text review by  
40  
41 L.Z. and cross checked by L.Y. to confirm their eligibility. Any disagreement was  
42  
43 resolved by consensus and discussion with a third reviewer (J.S. or AL.Z.).  
44  
45

46  
47 Two reviewers (L.Z and L.Y.) independently extracted data from eligible studies into  
48  
49 a pre-designed spreadsheet. A third reviewer (J.S.) cross checked the data. Study  
50  
51 design characteristics, trial locations, demographic features (age, types of diabetes,  
52  
53 baseline albuminuria, kidney function, etc.), intervention and control protocol (herbal  
54  
55  
56  
57

1  
2  
3 ingredients, dosage, frequency, treatment duration, follow-up period, etc.), and  
4  
5  
6 outcome measures were recorded. Authors of studies with missing data were  
7  
8 contacted by email or telephone to obtain additional data.  
9

### 10 **Data Synthesis and Analysis**

11  
12 All studies satisfying the eligibility criteria were included for qualitative synthesis.  
13  
14 For continuous variables, mean and standard deviation of each study were obtained  
15  
16 and pooled as mean difference (MD) or standardized mean differences (SMD) with a  
17  
18 95% confidence interval (CI). For dichotomous data, risk ratios (RR) were calculated  
19  
20 with a 95% CI. Considering the diversity of interventions and potential heterogeneity  
21  
22 among included studies, a random-effect model was applied in all meta-analyses.  
23  
24 Review Manager Software (RevMan, version 5.3) was used to perform the statistical  
25  
26 analysis.<sup>22</sup>  
27  
28  
29  
30  
31

32 Pre-defined subgroup analysis included baseline DKD severity and CHM formulae.  
33  
34 Heterogeneity between studies was detected by using the Cochrane Q statistic and  $I^2$   
35  
36 test. For outcomes with substantial heterogeneity ( $I^2$  levels >50%), subgroup analyses  
37  
38 were performed to explore potential sources, whereby results were stratified by  
39  
40 factors, such as different measured approaches for the same outcome. Sensitivity  
41  
42 analysis was performed by excluding studies with high/unclear risk of bias in the  
43  
44 domain of random sequence generation. Publication bias was explored when 10 or  
45  
46 more studies were included in one meta-analysis by visual inspection of funnel plots  
47  
48 for asymmetry.  
49  
50  
51  
52  
53

### 54 **Quality Assessment**

1  
2  
3  
4 The methodologic quality of each individual study was assessed by two reviewers  
5  
6 (L.Z. and L.Y.) in parallel according to the Cochrane Risk of Bias (ROB) tool.<sup>23</sup> For  
7  
8 the domain of other sources of bias, baseline imbalance and conflicts of interest were  
9  
10 evaluated. Each domain was judged as high, low or unclear risk of bias with  
11  
12 justifications. The consistency was checked by a third reviewer (L.Z.) and  
13  
14 disagreements were resolved by discussion with methodologists (AL.Z. and X.G.).  
15  
16  
17 To evaluate the overall quality of evidence for primary outcomes, the Grading of  
18  
19 Recommendations Assessment, Development and Evaluation (GRADE) approach was  
20  
21 applied.<sup>24</sup> A panel group was formed to make the GRADE evaluation, which included  
22  
23 methodologists, CM practitioners and conventional medicine physicians. The  
24  
25 assessments of evidence started at 'high quality', and were downgraded when  
26  
27 significant risk of bias, indirectness, inconsistency, imprecision of estimated effect or  
28  
29 publication bias were detected.  
30  
31  
32  
33

### 34 35 **Patient and Public Involvement**

36  
37 Patients or public were not directly involved in this systematic review.  
38  
39  
40  
41

## 42 43 **RESULTS**

### 44 45 **Description of Studies**

46  
47 The comprehensive search retrieved over 50 thousand citations and 7,255 of them  
48  
49 were examined in full-text (**Figure 1**). Eighty-five percent of the studies were  
50  
51 excluded due to lack of a placebo control. As a result, 20 eligible studies with 23  
52  
53 publications involving 2,719 DKD participants were included.<sup>25-47</sup> For studies with  
54  
55  
56  
57

1  
2  
3 multiple reports, the most recent publication or the one with primary outcomes was  
4 used, and complementary outcomes data from other reports were extracted and  
5 merged.  
6  
7  
8  
9

10 Characteristics of the included studies are summarized in **Table 1**. All 20 studies were  
11 conducted in China. Except for one study<sup>34</sup> written in English, all others were  
12 published in Chinese language between 2000 and 2017. Enrolled participants were all  
13 diabetic patients with exceeded albuminuria or proteinuria but varied in baseline  
14 kidney function. The mean of age was 55.1 years old (range 20 to 79). Three  
15 studies<sup>27-29</sup> used herbal compounds or a single herb as intervention while the  
16 remaining 17 studies used CHM formulae with multi-ingredients. The ingredients of  
17 CHM used in each study are provided in **appendix Table 2**. The most common herbal  
18 ingredients used by ten or more studies were *Astragali Radix*, *Rehmanniae Radix* and  
19 *Rhei Radix et Rhizoma*. All studies applied CHM matched placebo, except for one<sup>47</sup>  
20 which made Captopril (comparator) identical in appearance to CHM (intervention).  
21 Treatment duration ranged from 4 weeks to 2 years (median 3 months). There were no  
22 outcome data with respect to cardiovascular mortality and all-cause hospitalisation  
23 among all included studies.  
24  
25  
26  
27  
28  
29  
30  
31  
32  
33  
34  
35  
36  
37  
38  
39  
40  
41  
42  
43  
44

### 45 **Quality of Studies**

46 Generally, the quality of included studies was fair with low or unclear risk of bias,  
47 especially regarding blinding and outcome data completeness (**Figure 2**). Two studies  
48 were judged as high risk of bias with respect to blinding of patients and personnel  
49 because blinding may have been compromised by prescription of unequal  
50  
51  
52  
53  
54  
55  
56  
57  
58  
59  
60

1  
2  
3 numbers/amounts of medication between groups.<sup>43, 45</sup> Twelve studies reported correct  
4 procedures for random sequence generation,<sup>25, 27, 28, 30, 32, 34, 36-38, 43-45</sup> whereas eight  
5 studies did not provide adequate details. For the domain of allocation concealment,  
6 one study did not conceal the allocation to researchers thus was judged with high  
7 risk.<sup>37</sup> Seven studies were considered with high risk of selection reporting bias  
8 (mainly incomplete reporting in secondary outcomes),<sup>25, 30, 35, 38, 41, 44, 45</sup> whilst unclear  
9 risk in 13 other studies since protocols were not found. Other biases included baseline  
10 balance and conflict of interest assessment. Two high risk studies included  
11 pharmaceutical industry employees as co-authors thereby introducing conflicts of  
12 interest.<sup>27,28</sup> Seven studies which either without baseline statistical test results or  
13 without information regarding sources of funding were ranked as unclear risk.<sup>29, 31, 32,</sup>  
14 36, 41, 43, 45

### 33 **Effect Evaluation of CHM Therapy**

34  
35 Considering the uses of RAS blockage may affect the primary outcomes, studies were  
36 categorized and separated into three groups according to trial application of RAS  
37 blockade (angiotensin converting enzyme inhibitors [ACEi] and/or angiotensin  
38 receptor blockers [ARB]) in each arm prior to meta-analysis. It should be noted that  
39 conventional concurrent treatments of DKD recommended by guidelines were applied  
40 equally in both groups in all included studies, such that these conventional treatments  
41 are not separately mentioned henceforth. The three groups were:

- 42 • CHM versus placebo;<sup>25-33</sup>
- 43 • CHM plus ACEi/ARB versus placebo plus ACEi/ARB;<sup>34-38</sup> and,



- CHM versus placebo plus ACEi/ARB.<sup>38-47</sup>

### ***Mortality and progression to ESKD***

Though all-cause mortality was measured in a study<sup>45</sup> comparing CHM with matched placebo plus Irbesartan, no deaths observed amongst the 315 participants during the two-year follow-up (**Table 2**). Within the same trial,<sup>45</sup> the number of patients that progressed to ESKD was reported as part of the composite outcome, measuring with the number of patients with microalbuminuria progressing to macroalbuminuria, doubling serum creatinine from baseline, or initiating dialysis. Compared with placebo plus Irbesartan, the risk of experienced this composite outcome may be 66% lower in the CHM group (RR: 0.34, 95%CI [0.15, 0.77], P=0.01; low quality evidence).

### ***Albuminuria***

Fourteen studies reported albuminuria outcome at the end of treatment (**Figure 3a**). Based on meta-analysis of eight studies<sup>25-29, 31-33</sup> involving 1,021 participants, the CHM group experienced lower end of study albuminuria than the placebo group (SMD -0.92, 95%CI [-1.35, -0.51], I<sup>2</sup>=87%, P<0.0001; moderate quality evidence). Subgroup analysis suggested different CHM formulae could be the sources of heterogeneity (**Table S3**). The estimate of effect with the least heterogeneity was observed in the Qi Wei granule CHM subgroup<sup>26, 33</sup> in which albuminuria was 70.06 mg/24h lower compared to placebo after 3 months (95%CI [-88.84, -51.28], I<sup>2</sup>=0%, P<0.0001). Likewise, the Arctiin granule<sup>27,28</sup> probably reduced albuminuria greater than placebo group after 2 months intervention (SMD -0.38, 95% CI [-0.56, -0.20],

1  
2  
3  
4  
5  
6  
7  
8  
9  
10  
11  
12  
13  
14  
15  
16  
17  
18  
19  
20  
21  
22  
23  
24  
25  
26  
27  
28  
29  
30  
31  
32  
33  
34  
35  
36  
37  
38  
39  
40  
41  
42  
43  
44  
45  
46  
47  
48  
49  
50  
51  
52  
53  
54  
55  
56  
57  
58  
59  
60

$I^2=0\%$ ,  $P<0.0001$ ).

When used in combination with ACEi/ARB, lower end of treatment albuminuria level was still observed in the CHM rather than in the placebo group (SMD -0.56, 95%CI [-1.04, -0.08],  $I^2=64\%$ ,  $P=0.002$ ; moderate quality evidence).<sup>34, 36, 37</sup> However, though lower albuminuria excretion was observed in the CHM group,<sup>41, 42, 47</sup> the effect of CHM in decreasing albuminuria compared to ACEi/ARB was uncertain because of the very low quality of evidence (**Table 2**).

### ***Proteinuria***

Nine studies measured end of treatment 24-hour proteinuria (**Figure 3b**). The pooled estimated effect favored CHM over placebo in reducing proteinuria, although heterogeneity was marked (SMD -1.34, 95%CI [-2.18, -0.51],  $I^2=94\%$ ,  $P=0.002$ ; low quality evidence).<sup>26-28, 33</sup> Subgroup analysis revealed that different formulae and proteinuria measured approaches may have been the source of heterogeneity (**Table S3**). Pooled estimates of effect of Qi Wei granule<sup>26, 33</sup> and Arctiin granule<sup>27, 28</sup> both showed that CHM may lead to greater reductions in proteinuria than placebo. Subgroup of measurements unit of microgram per 24-hour showed the proteinuria was 324.42 mg/24h lower (95%CI, [-485.15, -163.69];  $I^2=30\%$ ;  $P<0.0001$ ) in the CHM than the placebo group.<sup>27, 28, 33</sup>

However, favorable effect of CHM disappeared when combination used with ACEi/ARB in proteinuria outcome. Meta-analysis of four studies with 489 participants<sup>34-36, 38</sup> reporting proteinuria showed little between group difference with significant heterogeneity (SMD -0.15, 95%CI [-0.52, 0.23],  $I^2=72\%$ ,  $P=0.44$ ; low

1  
2  
3  
4 quality evidence). Sources of heterogeneity were not identified (**Table S3**). Likewise,  
5  
6 it remained unknown whether CHM reduced more proteinuria than ACEi/ARB based  
7  
8 on current low quality of evidence of uncertain effect (**Table 2**).<sup>38, 43</sup>  
9

### 10 ***Serum Creatinine Level***

11  
12 Ten studies provided end of treatment data of serum creatinine (Scr) level (**Figure 3c**).  
13  
14 Pooled estimation of two small studies<sup>30, 33</sup> showed that the additional CHM  
15  
16 intervention may have made little difference to Scr compared with placebo (MD 5.75  
17  
18  $\mu\text{mol/L}$ , 95%CI [-2.06, 13.57],  $I^2=0\%$ ,  $P=0.15$ ; moderate quality of evidence). In  
19  
20 contrast, an average 4.02  $\mu\text{mol/L}$  lower (95%CI [-7.81, -0.23],  $I^2=0\%$ ,  $P=0.15$ ;  
21  
22 moderate quality evidence) end of treatment Scr level was observed in the CHM plus  
23  
24 ACEi/ARB group compared to the ACEi/ARB alone group.<sup>34-38</sup> Subgroup analysis  
25  
26 found that the lowering Scr effect of CHM was evident in patients with abnormal  
27  
28 baseline Scr (MD -9.99  $\mu\text{mol/L}$ , 95%CI [-17.71, -2.26],  $I^2=0\%$ ,  $P=0.01$ ).<sup>36, 38</sup>  
29  
30  
31  
32  
33  
34

35  
36 Though lower Scr level was observed in the CHM group when directly compared to  
37  
38 ACEi/ARB group, the confidence was compromised due to the conflict sensitivity  
39  
40 analysis result (**Table S4**).<sup>38, 41-43</sup> Subgroup analysis found that the superiority of  
41  
42 CHM in reducing Scr was the most apparent in patients with normal baseline Scr (MD  
43  
44 -4.07  $\mu\text{mol/L}$  95%CI [-6.13, -2.01],  $I^2=0\%$ ,  $P=0.0001$ )<sup>41-43</sup> or using the Tang Shen  
45  
46 Ning formula (MD -3.96  $\mu\text{mol/L}$ , 95%CI [-6.13, -1.78],  $I^2=6\%$ ,  $P=0.0004$ ).<sup>41, 42</sup>  
47  
48  
49

### 50 ***Estimated Glomerular Filtration Rate***

51  
52 Of the eight studies, the glomerular filtration rate (GFR) was estimated by either  
53  
54 Cockcroft-Gault equation or other serum creatinine-based equations (**Figure 3d**).  
55  
56

1  
2  
3  
4 Benefits of CHM was observed when adding on ACEi/ARB, with an average 6.28  
5  
6 mL/min higher estimated GFR (eGFR) than placebo plus ACEi/ARB (95%CI [2.42,  
7  
8 10.14],  $I^2=0\%$ ,  $P=0.001$ ; moderate quality evidence).<sup>34, 36-38</sup> Subgroup analysis of  
9  
10 specific formula showed the end of treatment eGFR was 5.22 mL/min higher (95%CI  
11  
12 [0.69, 9.74],  $I^2=0\%$ ,  $P=0.02$ ) in the Tang Shen Fang formula plus ACEi/ARB group  
13  
14 than the ACEi/ARB alone group.<sup>34, 38</sup>

15  
16  
17  
18 One small study (44 participants)<sup>33</sup> provided low quality of evidence that CHM was  
19  
20 not superior to placebo in terms of eGFR (**Table 2**). When compared to active control  
21  
22 (ACEi/ARB), pooled estimation indicated that no significant differences between the  
23  
24 CHM group and the ACEi/ARB group for improving eGFR (low quality evidence;  
25  
26 **Table 2**).<sup>38, 41, 42, 44</sup>

### 27 28 29 30 **Secondary Outcomes**

31  
32  
33 Meta-analysis results of secondary outcomes were summarized in **appendix Table S5**.  
34  
35 When compared to placebo, the pooled estimated effects for both fasting blood  
36  
37 glucose (FBG)<sup>25, 30-33, 36, 37, 42, 47</sup> and HbA1c<sup>30, 31, 33, 34, 36, 37, 42, 47</sup> did not show additional  
38  
39 benefit of CHM in lowering blood glucose. Likewise, summarized effects from three  
40  
41 studies showed no statistical differences between the CHM and placebo groups for  
42  
43 systolic and diastolic blood pressure.<sup>31, 33, 34</sup> CHM resulted in lower levels of total  
44  
45 cholesterol,<sup>29-32, 34, 36, 37, 47</sup> triglycerides<sup>29-32, 34, 36, 37, 47</sup> and LDL-C<sup>29-32, 34, 36, 37</sup>, although  
46  
47 HDL-C levels<sup>29-32, 34, 36, 37, 47</sup> were not statistically significantly different compared to  
48  
49 placebo. However, the results were limited by substantial heterogeneity and the reason  
50  
51 was not found. Three studies<sup>34, 38, 45</sup> measured patients' quality of life by questionnaire  
52  
53  
54  
55  
56  
57  
58  
59  
60

1  
2  
3 at the end of treatment but only two of them applied Diabetes QoL tool provided  
4  
5 usable data. The pooled estimation suggested no statistically significant differences  
6  
7  
8 between the CHM and the placebo group regarding the quality of life.<sup>34, 45</sup>  
9

### 10 **Safety Evaluation of CHM Therapy**

11  
12 Data on adverse events were provided in 14 studies. Of these, seven studies stated no  
13  
14 adverse events were observed during study period.<sup>26, 30, 33, 35, 42, 44, 47</sup> In total, 53 cases  
15  
16 of adverse events were reported in seven studies with 1,445 participants. Except for  
17  
18 Li's study,<sup>45</sup> details of AEs in each group were reported. The most common AE of  
19  
20 CHM was digestive system disorders (18 cases), including abdominal pain, diarrhea  
21  
22 or sloppy stool.<sup>27, 28, 37</sup> Both the CHM and control groups reported a modest number of  
23  
24 cases of elevated liver enzyme levels (11 cases), infection (2 cases) or anemia (3  
25  
26 cases).<sup>34, 38, 43</sup> In a three-arm study,<sup>38</sup> one case of hypertension in the CHM group, one  
27  
28 case of hypotension in losartan group and one case of hyperkalemia in CHM plus  
29  
30 losartan group were reported. All participants experienced above AEs recovered after  
31  
32 discontinuation of the tested interventions. Three cases of serious AEs, including two  
33  
34 cases of death and a case of acute myocardial infarction (AMI), were reported in Li's  
35  
36 trial.<sup>34</sup> One participant in the CHM group died due to subarachnoid hemorrhage while  
37  
38 another participant died after AMI. The researchers reported that these serious AEs  
39  
40 were not related to the study agent.  
41  
42  
43  
44  
45  
46  
47  
48

### 49 **Sensitivity and Subgroup Analysis**

50  
51 The sensitivity analysis of excluding studies with substantial risk of bias regarding  
52  
53 randomization showed consistency results with the primary analysis, except for the  
54  
55  
56

1  
2  
3 comparison of CHM versus placebo plus ACEi/ARB in terms of Scr level (**Table S4**).  
4  
5 Subgroup analysis indicated that baseline kidney function, different CHM formulae  
6  
7 and outcome measured methods could partially explain the variant treatment effect of  
8  
9 primary outcomes (**Table S3**). Publication bias was not evaluated due to the limited  
10  
11 number of studies included in each outcome.  
12  
13  
14  
15

## 16 17 18 **DISCUSSION**

19  
20 This review included 20 RCTs involving 2,719 participants to evaluate the effects and  
21  
22 safety of CHM or placebo in addition to conventional therapies of DKD. As an  
23  
24 adjunctive therapy, CHM favorably decreased proteinuria (either measured as urinary  
25  
26 albumin or protein excretion) in patients with DKD compared with placebo,  
27  
28 regardless of concomitant use of ACEi/ARB or not. When CHM and ACEi/ARB were  
29  
30 used simultaneously, beneficial effects of CHM on Scr and eGFR were observed. In  
31  
32 addition, CHM appeared to play a role in regulating blood lipids in the DKD  
33  
34 population. These results suggest potential additional renal protective benefit by  
35  
36 adding CHM to other conventional pharmacotherapies in DKD populations. However,  
37  
38 due to the short follow-up periods and small numbers of clinical events (such as  
39  
40 mortality and progression to ESKD) in included studies, the long-term clinical benefit  
41  
42 of CHM is yet to be determined.  
43  
44  
45  
46  
47  
48

49 Findings from this review were basically in line with those of previous reviews  
50  
51 focusing on single herbs or particular formulae. Li et.al reviewed the clinical effect of  
52  
53 preparations of *Astragali Radix* in DKD patients, finding that *Astragali* injection  
54  
55  
56

1  
2  
3 lowered Scr, increased eGFR and reduced urinary protein based on data from 21  
4  
5 randomized controlled trials and 4 non-randomised controlled trials.<sup>48</sup> In published  
6  
7 reviews of *Ginkgo Folium* extract and Xue Zhi Kang capsules, lower fasting blood  
8  
9 glucose and HbA1c levels in the CHM group were reported.<sup>49, 50</sup> The inconsistency in  
10  
11 terms of the glyceic outcomes may have been due to differences in ingredients  
12  
13 amongst the included studies. In our review, only two trials applied either *Ginkgo*  
14  
15 *Folium* extract or Xue Zhi Kang capsules as interventions. The glyceic control  
16  
17 effect may have been diluted by other trials using various herbal ingredients, which  
18  
19 targeting on kidney rather than glyceic control. It should also be noted that the  
20  
21 studies included in the previous reviews of *Ginkgo Folium* extract and Xue Zhi Kang  
22  
23 capsules resulted in significant risk of bias (including publication bias). Thus,  
24  
25 rigorous and large scale clinical trials are needed to confirm the glyceic control  
26  
27 effects of CHM.  
28  
29  
30  
31  
32  
33  
34

35 The renal protective effect of CHM may be related to particular bioactive compounds  
36  
37 contained in the herbal ingredients included in these RCTs. The most frequently used  
38  
39 herb was *Astragali Radix*. Both *in vitro* and *in vivo* studies have indicated that  
40  
41 chemical components of *Astragali Radix*, such as Astragaloside IV and Astragalus  
42  
43 Saponin I, exert anti-oxidative and anti-inflammatory properties in diabetic  
44  
45 models.<sup>51,52</sup> These chemicals can prevent and restore kidney tissue injury related to  
46  
47 oxidative stress. Additionally, Astragaloside IV can reduce endoplasmic reticulum  
48  
49 stress and increase podocyte integrity, which is the therapeutic target for decreasing  
50  
51 albuminuria.<sup>53, 54</sup> The second most frequently used herb, *Rehmanniae Radix*, also  
52  
53  
54  
55  
56  
57  
58  
59  
60

1  
2  
3 upregulates anti-inflammatory and antioxidant effects in diabetic rats.<sup>55</sup> Furthermore,  
4 anti-diabetic properties were observed in its constituent compound (catalpol) and  
5  
6 ethanolic extract.<sup>56</sup> Although the glucose lowering effect of *Rehmanniae Radix* was  
7  
8 not superior to metformin, its use was associated with higher anti-inflammatory  
9  
10 activity, lower oxidative stress levels, and restoration of diabetes-induced kidney  
11  
12 lesions. The third most frequent herb was *Rhei Radix et Rhizoma*. Active compounds  
13  
14 of *Rhei Radix et Rhizoma*, including anthraquinones (rhein and emodin) and phenolic  
15  
16 acids (gallic acid and ferulic acid), have been shown to protect the kidneys by  
17  
18 reducing oxidative stress, inflammation, fibronectin and extracellular matrix  
19  
20 accumulation.<sup>57-59</sup> Furthermore, *in vitro* experiments have demonstrated that extracts  
21  
22 of *Rhei Radix et Rhizoma* can inhibit lipid peroxidation and lower serum lipid levels,  
23  
24 which are risk factors for diabetes and DKD progression.<sup>60,61</sup>

25  
26  
27  
28  
29  
30  
31  
32  
33 This study demonstrated that CHM may be applied as an add-on treatment for DKD  
34  
35 to achieve better renal outcomes. For those patients with DKD who are on ACEi/ARB,  
36  
37 CHM may improve kidney function, albuminuria, proteinuria and blood lipids. For  
38  
39 the subgroup of patients with DKD who are intolerant to ACEi/ARB, CHM can be  
40  
41 applied with standard care to decrease urinary protein excretion. Since the participants  
42  
43 in most included trials were older adults with a GFR greater than 60 mL/min, the  
44  
45 renal protective effect of CHM in younger individuals and in advanced kidney disease  
46  
47 is less uncertain. Moreover, all included studies were conducted in China, such that  
48  
49 the effect of CHM reported in this review may not be generalizable to other  
50  
51 population groups. It should further be noted that, in most of the included studies, the  
52  
53  
54  
55  
56  
57  
58  
59  
60



1  
2  
3 forms of CHM used were multi-ingredients herbal formulae, which were constructed  
4  
5 based on traditional Chinese medicine theory and experts' clinical experience. While  
6  
7 indicative from pharmacological studies, the most frequently used ingredients  
8  
9 discussed above may not necessarily be relevant to the observed effects reported in  
10  
11 this study.  
12  
13  
14

15 Renal toxicity induced by aristolochic acid (AA) has been alerted since a series of  
16  
17 renal failure cases caused by AA contaminated products were reported.<sup>62, 63</sup> In our  
18  
19 review, the CHM used in included studies appeared to be well-tolerated and safety  
20  
21 signals were not identified. This could be related to the fact that all herbal ingredients  
22  
23 investigated were free from AA, and some of the studies mentioned a strict quality  
24  
25 control processes regarding the CHM raw material and manufactured procedures.<sup>34, 40,</sup>  
26  
27  
28  
29  
30  
31  
32  
33  
34  
35  
36  
37  
38  
39  
40  
41  
42  
43  
44  
45  
46  
47  
48  
49  
50  
51  
52  
53  
54  
55  
56  
57  
58  
59  
60  
45 Mortality risk reduction effect of non-AA prescribed CHM was indicated in a  
Chronic Kidney Disease population study, but for DKD patients, the long-term safety  
of CHM requires further studies to confirm.<sup>64</sup>

Although this review was conducted in a systematic and comprehensive manner, there  
are limitations that should be taken into account when interpreting the findings. Firstly,  
the number of included studies was relatively small and few studies measured and  
reported the same outcomes consistently. This caused difficulty in meta-analysis and  
introduced heterogeneity across studies and led to downgrade in quality of evidence.  
Core outcome sets with standardized measurements are needed in future studies to  
determine the effect of CHM. Secondly, most of the studies had short follow-up  
periods (1-3 months) and small sample sizes, leading to imprecision of the estimated

1  
2  
3 effect and low confidence with regard to long-term benefit and effect on renal  
4  
5 function. Thirdly, more than half of the included studies did not provide information  
6  
7 on randomization and allocation procedures, such that the impact of potential  
8  
9 selection bias was unclear. In addition, although the CHM formulae were processed as  
10  
11 granules or capsules in order to achieve blinding, quality assurance information for  
12  
13 each CHM preparation was not provided in most of the studies. Further studies are  
14  
15 strongly encouraged to report following the CONSORT reporting guidelines.<sup>65-67</sup>  
16  
17 Finally, although we did not limit the CHM interventions in terms of herbal  
18  
19 composition, five included studies shared highly homologous CHM ingredients  
20  
21 synthesis,<sup>26, 33, 34, 38, 45</sup> thereby limiting the diversity of CHM treatments evaluated.  
22  
23  
24  
25  
26  
27

## 28 **CONCLUSION**

29  
30 In conclusion, combination of CHM with conventional RAS blockade  
31  
32 pharmacotherapy showed promise as an add-on treatment for improving renal  
33  
34 function and decreasing urinary albumin and protein excretion in patients with DKD.  
35  
36 The rate of occurrences adverse events was low and the tested CHM appeared to be  
37  
38 well-tolerated. This systematic review also provided potential candidate formulae and  
39  
40 frequently used herbs for further investigation. Well-designed RCTs following  
41  
42 reporting guidelines with adequate sample sizes and follow-up periods are warranted  
43  
44 to confirm the long-term efficacy and safety of CHM, especially with respect to  
45  
46 patient-oriented outcomes such as mortality, disease progression, and quality of life.  
47  
48  
49  
50  
51  
52  
53  
54  
55  
56  
57  
58  
59  
60

## Acknowledgements

The project is jointly supported by the China-Australia International Research Centre for Chinese Medicine (CAIRCCM) - a joint initiative of RMIT University, Australia and the Guangdong Provincial Academy of Chinese Medical Sciences, China with additional funding support from the Ministry of Science & Technology of China (International Cooperation Project, Grant Number 2012DFA31760), and a grant from the National Natural Science Foundation of China (Grant Number 81603717). La Zhang is supported by a Chinese Medicine Collaborative Research Training Scholarship from CAIRCCM. David Johnson is supported by an Australian National Health and Medical Research Council Practitioner Fellowship.

## Competing Interests

None declared.

## Data Sharing Statement

No additional data are available.

## Contributions

Research idea and study design: LZ, CL, CCX, WM; data collection and screening: LZ, LY, JS, XQ, ALZ; data extraction: LZ, LY, JS; data analysis: LZ, JS; ROB assessment: LZ, LY, XG, ALZ; GRADE assessment: WM, LZ, LY, JS, and DJ; Manuscript writing: all authors; supervision and mentorship: CCX, XL, CL. Each author contributed important intellectual content during manuscript drafting or revision and accepts accountability for the overall work by ensuring that questions pertaining to the accuracy or integrity of any portion of the work are appropriately

1  
2  
3 investigated and resolved.  
4

5  
6 **Supplementary Appendix**  
7

8 Table S1: Search strategy of MEDLINE.  
9

10 Table S2: Herbal Ingredients used in included studies  
11

12  
13 Table S3: Subgroup Analysis of primary outcomes  
14

15 Table S4: Sensitivity Analysis of primary outcomes  
16

17  
18 Table S5: Meta-analysis results of secondary outcomes  
19  
20  
21  
22  
23  
24  
25  
26  
27  
28  
29  
30  
31  
32  
33  
34  
35  
36  
37  
38  
39  
40  
41  
42  
43  
44  
45  
46  
47  
48  
49  
50  
51  
52  
53  
54  
55  
56  
57  
58  
59  
60

## References

[1]. White SL, Chadban S. KinD Report (Kidneys in Diabetes): temporal trends in the epidemiology of diabetic kidney disease and the associated health care burden in Australia. *Report of the Kidney in Diabetes*. Melbourne, Australia: Kidney Health Australia; 2014.

[2]. Saran R, Li Y, Robinson B, et al. US renal data system 2014 annual data report: epidemiology of kidney disease in the United States. *Am J Kidney Dis*. 2015;66 (1) (suppl 1):S1-S305.

[3]. Sarnak MJ, Levey AS, Schoolwerth AC, et al. Kidney disease as a risk factor for development of cardiovascular disease: a statement from the American Heart Association Councils on Kidney in Cardiovascular Disease, High Blood Pressure Research, Clinical Cardiology, and Epidemiology and Prevention. *Hypertension*. 2003;42(5):1050-1065.

[4]. Writing Team for the Diabetes Control and Complications Trial/Epidemiology of Diabetes Interventions and Complications Research Group. Sustained effect of intensive treatment of type 1 diabetes mellitus on development and progression of diabetic nephropathy: the Epidemiology of Diabetes Interventions and Complications (EDIC) study. *JAMA*. 2003;290(16):2159-2167.

[5]. UK Prospective Diabetes Study Group. Tight blood pressure control and risk of macrovascular and microvascular complications in type 2 diabetes: UKPDS 38. *BMJ*. 1998;317(7160):703-713.

[6]. National Kidney Foundation. KDOQI clinical practice guideline for diabetes and CKD: 2012 update. *Am J Kidney Dis*. 2012;60(5):850-886.

[7]. Fingerhut D. KDOQI Clinical practice guidelines and clinical practice recommendations for diabetes and chronic kidney disease. *Am J Kidney Dis*. 2007;49(2)(suppl 2):S12-S154.

[8]. Afkarian M, Zelnick LR, Hall YN, et al. Clinical manifestations of kidney disease among US adults with diabetes, 1988-2014. *JAMA*. 2016;316(6):602-610.

[9]. Packham DK, Wolfe R, Reutens AT, et al. Sulodexide fails to demonstrate renoprotection in overt type 2 diabetic nephropathy. *J Am Soc Nephrol*. 2012;23(1):123-130.

[10]. de Zeeuw D, Akizawa T, Audhya P, et al. Bardoxolone methyl in type 2 diabetes and stage 4 chronic kidney disease. *N Engl J Med*. 2013;369(26):2492-2503.

- 1  
2  
3 [11]. Brenneman J, Hill J, Pullen S. Emerging therapeutics for the treatment of  
4 diabetic nephropathy. *Bioorg Med Chem Lett*. 2016;26(18):4394-4402.  
5  
6 [12]. Zhang L, Li Y, Guo X, et al. Text mining of the classical medical literature for  
7 medicines that show potential in diabetic nephropathy. *Evid Based Complement*  
8 *Alternat Med*. 2014; 2014:189125.  
9  
10 [13]. Gao YB, Liu TH, Nan Z, Zhen Z, Zhou Q. The Chinese medicine diagnosis and  
11 treatment standards of diabetic nephropathy. *World Journal of Integrated Traditional*  
12 *and Western Medicine*. 2011;6(6):548-552. (in Chinese)  
13  
14 [14]. China Academy of Chinese Medical Sciences. Evidence-based guidelines of  
15 clinical practice in Chinese medicine- internal medicine. *Beijing: China Press of*  
16 *Traditional Chinese Medicine*; 2011. (in Chinese)  
17  
18 [15]. China Association of Chinese Medicine. Guideline for TCM diabetes prevention  
19 and treatment. *Beijing: China Press of Traditional Chinese Medicine*; 2007. (in  
20 Chinese)  
21  
22 [16]. Lord GM, Cook T, Arlt VM, Schmeiser HH, Williams G, Pusey CD. Urothelial  
23 malignant disease and Chinese herbal nephropathy. *Lancet*.  
24 2001;358(9292):1515-1516.  
25  
26 [17]. Stanifer JW, Kilonzo K, Wang D, et al. Traditional medicines and kidney  
27 disease in low-and middle-income countries: opportunities and challenges. *Semin*  
28 *Nephrol*. 2017;37(3):245-259.  
29  
30 [18]. Abstracts of the 24th Cochrane Colloquium, 23-27 October 2016, Seoul, South  
31 Korea. Cochrane Database of Systematic Reviews 2016, Issue 10 (Suppl 2).  
32 dx.doi.org/10.1002/14651858.CD20160  
33  
34 [19]. Savović J, Jones H E, Altman D G, et al. Influence of reported study design  
35 characteristics on intervention effect estimates from randomized, controlled trials[J].  
36 *Annals of internal medicine*, 2012, 157(6): 429-438.  
37  
38 [20]. Higgins JPT, Green S. Cochrane handbook for systematic reviews of  
39 interventions 5.1. 0[J]. The Cochrane Collaboration, 2011: 33-49.  
40  
41 [21]. Moher D, Liberati A, Tetzlaff J, et al. Preferred reporting items for systematic  
42 reviews and meta-analyses: the PRISMA statement[J]. *International journal of surgery*,  
43 2010, 8(5): 336-341.  
44  
45  
46  
47  
48  
49  
50  
51  
52  
53  
54  
55  
56  
57  
58  
59  
60

- 1  
2  
3 [22]. The Nordic Cochrane Centre, The Cochrane Collaboration. *Review Manager*  
4 (*RevMan*). Copenhagen, Denmark: The Nordic Cochrane Centre, The Cochrane  
5 Collaboration; 2014.  
6  
7  
8 [23]. Higgins JPT, Altman DG, Gøtzsche PC, et al. The Cochrane Collaboration's tool  
9 for assessing risk of bias in randomised trials. *BMJ*. 2011;343:d5928.  
10  
11 [24]. Schünemann H, Brozek J, Guyatt G. GRADE handbook for grading quality of  
12 evidence and strength of recommendation.  
13 <https://gdt.gradepro.org/app/handbook/handbook.html>. Accessed October 19, 2017.  
14  
15 [25]. Fan Y. Clinical study of Qi Kwai granules in early type 2 diabetic nephropathy.  
16 *Nanjing: Nanjing University medicin*; 2010. (in Chinese)  
17  
18 [26]. Jia XL. Study on clinic effect and experiment research of Qiwei treating the DN.  
19 *Beijing: Beijing University of Chinese Medicine*; 2012. (in Chinese)  
20  
21 [27]. Ma ST, Liu DL, Niu R, et al. Double -blind randomized placebo-controlled  
22 multi-centre phase □ clinical trial of Arctiin granule in the treatment of diabetic  
23 nephropathy. *Chin J Clin Pharmacol*. 2011;27(1):15-18. (in Chinese)  
24  
25 [28]. Ma ST, Liu DL, Niu R, et al. Tangjiangshekang granule in treatment of diabetic  
26 nephropathy: a double -blind, randomized, placebo-controlled multicentre clinical  
27 trial. *Chin J New Drugs Clin Rem*. 2011;30(1):16-19. (in Chinese)  
28  
29 [29]. Wei N, Chang WS, Xue DZ, Shen XF. Effect of Xuezhikang on oxidative stress  
30 in early diabetic nephropathy. *Chinese General Practice*. 2012;15(18):2085-2087. (in  
31 Chinese)  
32  
33 [30]. Wei X, Yao HJ, Liu Y, Zhang J. Efficacy observation of adjunctive treatment of  
34 gandi capsules for diabetic nephropathy. *China Pharmacy*. 2016;27(2):225-227. (in  
35 Chinese)  
36  
37 [31]. Xie SF, Huang LJ, Liu JS, Yu JY, Wang XC. The long-term effect of Yang yin  
38 he luo medicinals for reducing urinary albumin to creatinine ratio in early diabetic  
39 nephropathy patients. *Jiangsu J Tradit Chin Med*. 2011;43(9):19-20. (in Chinese)  
40  
41 [32]. Yang L, Tan ZH, Li YK. The clinical effect observation of Qiming granules  
42 with standard care for early diabetic nephropathy. *Guiding Journal of Traditional*  
43 *Chinese Medicine and Pharmacy*. 2014;20(6):52-53. (in Chinese)  
44  
45 [33]. Zhou JX. Effect and safety of Qiwei granule on diabetic nephropathy and  
46 podocyte. *Beijing: Beijing University of Chinese medicine*; 2014. (in Chinese)  
47  
48  
49  
50  
51  
52  
53  
54  
55  
56  
57  
58  
59  
60

- 1  
2  
3 [34]. Li P, Chen Y, Liu J, et al. Efficacy and safety of tangshen formula on patients  
4 with type 2 diabetic kidney disease: a multicenter double-blinded randomized  
5 placebo-controlled trial. *PLoS One*. 2015;10(5):e0126027.  
6  
7  
8 [35]. Liu YF. Qihuang capsule in treatment of diabetic nephropathy Qi and Yin  
9 deficiency syndrome clinical. *Harbin: Heilongjiang University Of Chinese Medicine*;  
10 2015. (in Chinese)  
11  
12  
13 [36]. Ni Q, Jiang S, Xiao YX, et al. A clinical observation on Qiyao Xiaoke capsule  
14 combined with western medicine for 146 cases of Diabetic Nephropathy. *Journal of*  
15 *Traditional Chinese Medicine*. 2013;54(6):484-487. (in Chinese)  
16  
17  
18 [37]. Yang M. Study on the clinical exploratory study of Qizhu granule in the  
19 treatment of early type 2 diabetic nephropathy. Beijing: China Academy of Chinese  
20 Medical Sciences; 2017. (in Chinese)  
21  
22  
23 [38]. Zhang LF, Zhao JX, Lv RH, et al. Study on the effectiveness and safety of  
24 optimum program of prevention and treatment of renal insufficiency of diabetic  
25 nephropathy. *China Foreign Medical Treatment*. 2006;47(10):755-758. (in Chinese)  
26  
27  
28 [39]. Zhang LF, Lv RH, Zhao JX, Wang SR. Effect of TCM treatment on quality of  
29 life in diabetic nephropathy patients with renal failure: a multi-centered clinical study.  
30 *Journal of Traditional Chinese Medicine*. 2008;49(2):119-122. (in Chinese)  
31  
32  
33 [40]. Zhang LF, Zhao JX, Lv RH, et.al. The effect of Differentiation Chinese Medicine  
34 Treatment on Syndrome Improvement in diabetic nephropathy patients with renal  
35 failure. Abstract of the forth International Integration Medicine Conference of Kidney  
36 Diseases. 2006. (in Chinese)  
37  
38  
39 [41] Gao YB, Zhao HL, Guan S, et al. Clinical research of Tang Shen Ning in treating  
40 early stage of diabetic nephropathy with types of deficiency of both vital energy and  
41 yin and collaterals si ltation and stagnant. *China Journal of Traditional Chinese*  
42 *Medicine and Pharmacy*. 2006;21(7):409-411. (in Chinese)  
43  
44  
45 [42]. Gao YB, Zhou H, Guan S, et.al..Multicenter randomized and double-blind  
46 controlled clinical trial of Tang Shen Ning Granules in treating diabetic kidney  
47 disease. *Chinese Journal of Traditional Chinese Medicine*. 2017;32(11):5212-215. (in  
48 Chinese)  
49  
50  
51 [43] Han YL, Liu HF, Lou XE, Miao GZ, Wang XQ. Method of combination of  
52 disease and syndrome in treating stage IV proteinuria in diabetic nephropathy of  
53 Qi-Yin deficiency. *Journal of Changchun University of Traditional Chinese Medicine*.  
54 2014;30(5):903-905. (in Chinese)  
55  
56  
57  
58  
59  
60



- 1  
2  
3 [44]. Jia M, Zhao JX, Dong C, Feng R. Clinical research of Sanhuang Yishen granule  
4 on patients diabetic nephropathy in □ stage. *World Chinese Medicine*.  
5 2015;10(6):845-848. (in Chinese)  
6  
7  
8 [45] Li J, Zhao JX, Wang SD, et al. Effect of the whole course intervention program  
9 of combined therapy of TCM on the endpoint events of diabetic nephropathy. *Journal*  
10 *of Traditional Chinese Medicine*. 2012;53(7):568-571. (in Chinese)  
11  
12  
13 [46]. Zhou X, Zhao JX, Wang SD, et al. Effect of TCM Comprehensive Treatment  
14 Program on Quality of Life in Patients With Diabetic Nephropathy. *Journal of*  
15 *Traditional Chinese Medicine*. 2014;55(6):473-477. (in Chinese)  
16  
17  
18 [47]. Lin L, Ni Q, Gao QJ et al. Clinical study on Tangweikang capsule in treating  
19 diabetic nephropathy. *Chinese Journal of Integrated Traditional and Western*  
20 *Medicine*. 2000;20(11):811-814. (in Chinese)  
21  
22  
23 [48]. Li M, Wang W, Xue J, Gu Y, Lin S. Meta-analysis of the clinical value of  
24 *Astragalus membranaceus* in diabetic nephropathy. *J Ethnopharmacol*.  
25 2011;133(2):412-419.  
26  
27  
28 [49]. Zhang L, Mao W, Guo XF, et al. Ginkgo biloba extract for patients with early  
29 diabetic nephropathy: a systematic review. *Evid Based Complement Alternat Med*.  
30 2013;2013:689142.  
31  
32  
33 [50]. Wang F, Wu HM. Xuezhikang for diabetic kidney disease: a systematic review  
34 of randomized controlled trials. *Chin J Evid-based Med*. 2009;9(1):63-70. (in  
35 Chinese)  
36  
37  
38 [51]. Gui D, Huang J, Guo Y, et al. Astragaloside IV ameliorates renal injury in  
39 streptozotocin-induced diabetic rats through inhibiting NF-kappaB-mediated  
40 inflammatory genes expression. *Cytokine*. 2013;61(3):970-977.  
41  
42  
43 [52]. Qi W, Niu J, Qin Q, Qiao Z, Gu Y. Astragaloside IV attenuates glycosylated  
44 albumin-induced epithelial-to-mesenchymal transition by inhibiting oxidative stress in  
45 renal proximal tubular cells. *Cell Stress Chaperones*. 2014;19(1):105-114.  
46  
47  
48 [53]. Gui D, Guo Y, Feng W, et al. Astragaloside IV, a novel antioxidant, prevents  
49 glucose-induced podocyte apoptosis in vitro and in vivo. *PLoS One*.  
50 2012;7(6):e39824.  
51  
52  
53 [54]. Wang ZS, Xiong F, Xie XH, Chen D, Pan JH, Cheng L. Astragaloside IV  
54 attenuates proteinuria in streptozotocin-induced diabetic nephropathy via the  
55 inhibition of endoplasmic reticulum stress. *BMC Nephrol*. 2015;16:44.  
56  
57

1  
2  
3 [55]. Waisundara VY, Huang M, Hsu A, Huang D, Tan BK. Characterization of the  
4 anti-diabetic and antioxidant effects of rehmannia glutinosa in streptozotocin-induced  
5 diabetic Wistar rats. *Am J Chin Med*. 2008;36(6):1083-1104.  
6  
7

8 [56]. Yang SS, Deng HC, Zhang QZ, et al. Amelioration of diabetic mouse  
9 nephropathy by catalpol correlates with down-regulation of Grb10 expression and  
10 activation of insulin-like growth factor 1 / insulin-like growth factor 1 receptor  
11 signaling. *PLoS One*. 2016;11(3):e0151857.  
12  
13

14 [57]. Zeng CC, Liu X, Chen GR, et al. The molecular mechanism of rhein in diabetic  
15 nephropathy. *Evid Based Complement Alternat Med*. 2014;2014:487097.  
16  
17

18 [58]. Ahad A, Ahsan H, Mujeeb M, Siddiqui WA. Gallic acid ameliorates renal  
19 functions by inhibiting the activation of p38 MAPK in experimentally induced type 2  
20 diabetic rats and cultured rat proximal tubular epithelial cells. *Chem Biol Interact*.  
21 2015;240:292-303.  
22  
23

24 [59]. Zhang ZH, Wei F, Vaziri ND, et al. Metabolomics insights into chronic kidney  
25 disease and modulatory effect of rhubarb against tubulointerstitial fibrosis. *Sci Rep*.  
26 2015;5:14472.  
27  
28

29 [60]. Punithavathi VR, Prince PS, Kumar R, Selvakumari J. Antihyperglycaemic,  
30 antilipid peroxidative and antioxidant effects of gallic acid on streptozotocin induced  
31 diabetic Wistar rats. *Eur J Pharmacol*. 2011;650(1):465-471.  
32  
33

34 [61]. Hosseini A, Mollazadeh H, Amiri MS, Sadeghnia HR, Ghorbani A. Effects of a  
35 standardized extract of Rheum turkestanicum Janischew root on diabetic changes in  
36 the kidney, liver and heart of streptozotocin-induced diabetic rats. *Biomed  
37 Pharmacother*. 2017;86:605-611.  
38  
39

40 [62]. Vanherweghem JL, Depierreux M, Tielemans C, et al. Rapidly progressive  
41 interstitial renal fibrosis in young women: association with slimming regimen  
42 including Chinese herbs. *Lancet*. 1993;341(8842):387-391.  
43  
44

45 [63]. Nortier JL, Martinez MC, Schmeiser HH, et al. Urothelial carcinoma associated  
46 with the use of a Chinese herb (*Aristolochia fangchi*). *N Engl J Med*.  
47 2000;342(23):1686-1692.  
48  
49

50 [64]. Hsieh CF, Huang SL, Chen CL, Chen WT, Chang HC, Yang CC.  
51 Non-aristolochic acid prescribed Chinese herbal medicines and the risk of mortality in  
52 patients with chronic kidney disease: results from a population-based follow-up study.  
53 *BMJ Open*. 2014;4(2):e004033.  
54  
55  
56

1  
2  
3 [65]. Schulz KF, Altman DG, Moher D. CONSORT 2010 Statement: updated  
4 guidelines for reporting parallel group randomized trials. *BMJ*. 2010;340:c332.  
5

6 [66]. Gagnier JJ, Boon H, Rochon P, et al. Reporting randomized, controlled trials of  
7 herbal interventions: an elaborated CONSORT statement. *Ann Intern Med*.  
8 2006;144(5):364-367.  
9  
10

11 [67]. Gagnier J, Boon H, Rochon P, et al. Improving the quality of reporting of  
12 randomized controlled trials evaluating herbal interventions: implementing the  
13 CONSORT statement [corrected]. *Explore (NY)*. 2006;2(2):143-149.  
14  
15  
16  
17  
18  
19  
20  
21  
22  
23  
24  
25  
26  
27  
28  
29  
30  
31  
32  
33  
34  
35  
36  
37  
38  
39  
40  
41  
42  
43  
44  
45  
46  
47  
48  
49  
50  
51  
52  
53  
54  
55  
56  
57  
58  
59  
60

**Table 1 Characteristics of Included Studies**

| Study                        | Sample Size (M/F) | Age   | Inclusion criteria of kidney function                                        | Intervention and Control Protocol                                                                                             | Duration | Reported Outcomes                                            |
|------------------------------|-------------------|-------|------------------------------------------------------------------------------|-------------------------------------------------------------------------------------------------------------------------------|----------|--------------------------------------------------------------|
| Fan YW (2010) <sup>25</sup>  | 61 (28/33)        | 59.6  | Albuminuria 30-300 mg/g or 30-300 mg/24h                                     | T: Qi Kui granule 1 bag bid<br>C: placebo                                                                                     | 12m      | UAE; FBG                                                     |
| Jia XL (2012) <sup>26</sup>  | 60 (29/31)        | 58.3  | Proteinuria < 3.5 g/24h;<br>Normal Scr level                                 | T: Qi Wei granule 4.5g tid<br>C: placebo                                                                                      | 3m       | UAE; 24hUP;                                                  |
| Ma ST (2011a) <sup>27</sup>  | 414 (186/ 228)    | 56.6  | Proteinuria ≤ 4.5 g/24h;<br>Scr ≤ 190 μmol/L                                 | T: Arctiin granule 1 bag tid<br>C: placebo                                                                                    | 2m       | UAE; 24hUP;                                                  |
| Ma ST (2011b) <sup>28</sup>  | 186 (78/108)      | 55.3  | Proteinuria ≤ 3.5 g/24h;<br>Scr < 176 μmol/L                                 | T1: Arctiin granule 2 bag bid + placebo 2 bag qd<br>T2: Arctiin granule 1 bag tid + placebo 1 bag tid<br>C: placebo 2 bag tid | 2m       | UAE; 24hUP;                                                  |
| Wei N (2012) <sup>29</sup>   | 56 (24/32)        | 50.6  | Albuminuria 30-300 mg/24h;<br>Scr ≤ 1.2 mg/dL                                | T: Xue Zhi Kang capsule 0.6g tid<br>C: placebo                                                                                | 3m       | UAE; TC; TG; LDLC; HDLC                                      |
| Wei X (2016) <sup>30</sup>   | 41 (32/9)         | 61.8  | Albuminuria > 30 mg/g and<br>Proteinuria ≤ 3.5 g/24h<br>GFR ≥ 30 mL/min      | T: Gan Di capsue 3# tid<br>C: placebo                                                                                         | 6m       | Scr; FBG; A1C; TC; TG; LDLC; HDLC                            |
| Xie SF (2011) <sup>31</sup>  | 67 (30/37)        | 62.3  | Albuminuria 30-299 μg/mg                                                     | T: Liu Wei Di Huang pill 3g tid + Ginkgo biloba tablet 19.2mg tid<br>C: LWDHW placebo + GBT placebo                           | 24m      | UAE; FBG; A1C; TC; TG; LDLC; HDLC; SBP; DBP                  |
| Yang L (2014) <sup>32</sup>  | 142 (80/62)       | 48.5  | Albuminuria 30-300 mg/24h;<br>Normal Scr level                               | T: Qi Ming granule 4.5g tid<br>C: placebo                                                                                     | 3m       | UAE; FBG; TC; TG; LDLC; HDLC                                 |
| Zhou JX (2014) <sup>33</sup> | 48 (27/21)        | 58.5  | Proteinuria ≤ 3.5 g/24h;<br>Normal Scr level                                 | T: Qi Wei granule 6g tid<br>C: placebo                                                                                        | 3m       | UAE; 24hUP; Scr; GFR; FBG; A1C; SBP; DBP                     |
| Li P (2015) <sup>34</sup>    | 180 (100/80)      | 59.0  | Albuminuria > 20 μg/min or<br>Proteinuria 0.5-2 g/24h<br>GFR 60-130 mL/min   | T: Tang Shen granule 8g bid + ACEi/ARB<br>C: placebo + ACEi/ARB                                                               | 6m       | UAE; 24hUP; Scr; GFR; A1C; TC; TG; LDLC; HDLC; SBP; DBP; QoL |
| Liu YF (2015) <sup>35</sup>  | 60 (NS)           | 20-70 | Albuminuria 20-200 μg/min or<br>Proteinuria ≤ 3.5 g/24h<br>GFR > 60 mL/min   | T: Qi Huang capsule 1.9g tid + losartan<br>C: placebo + losartan                                                              | 6m       | 24hUP; Scr                                                   |
| Ni Q (2013) <sup>36</sup>    | 224 (112/112)     | 54.7  | Albuminuria 20-200 μg/min or<br>Proteinuria ≤ 3.5 g/24h<br>GFR 60-130 mL/min | T: Qi Yao Xiao Ke capsule 2.4g tid + benazepril<br>C: placebo + benazepril                                                    | 3m       | UAE; 24hUP; Scr; GFR; FBG; A1C; TC; TG; LDLC; HDLC           |

|                                  |               |       |                                                               |                                                                                                                                          |     |                                            |
|----------------------------------|---------------|-------|---------------------------------------------------------------|------------------------------------------------------------------------------------------------------------------------------------------|-----|--------------------------------------------|
| Yang M (2017) <sup>37</sup>      | 25 (23/2)     | 59.3  | Albuminuria 20-200 µg/min or 30-300 mg/24h                    | T: Qi Zhu granule 1 bag bid + irbesartan<br>C: placebo + irbesartan                                                                      | 6m  | UAE; Scr; GFR FBG; A1C; TC; TG; LDLC; HDLC |
| Zhang LF (2006) <sup>38-40</sup> | 221 (119/102) | 61.9  | Proteinuria < 10g/24h; Scr 133-354 µmol/L or Ccr 30-70 mL/min | T 1: Modified Qi Wei granule 1 bag bid + losartan<br>T 2: Modified Qi Wei granule 1 bag bid + losartan simulant<br>C: placebo + losartan | 3m  | 24hUP; Scr; GFR; QoL                       |
| Gao YB (2006) <sup>41</sup>      | 90 (NS)       | 35-70 | Albuminuria 20-200 µg/min or 30-300 mg/24h                    | T: Tang Shen Ning granule 5g tid + benazepril simulant<br>C: placebo + benazepril                                                        | 2m  | UAE; Scr;                                  |
| Gao YB (2017) <sup>42</sup>      | 250 (116/134) | 52.3  | Albuminuria 30-300 mg/24h                                     | T: Tang Shen Ning granule 8g tid + losartan simulant<br>C: placebo + losartan                                                            | 3m  | UAE; Scr; FBG; A1C                         |
| Han YL (2014) <sup>43</sup>      | 104 (NS)      | 30-78 | Proteinuria ≥ 0.5 g/24h<br>Scr < 265 µmol/L                   | T1: Bao Shen pill 1 bag bid + Tripterygium glycosides 20mg tid<br>T2: Bao Shen pill 1 bag bid<br>C: BS placebo + valsartan               | 1m  | 24hUP; Scr                                 |
| Jia M (2015) <sup>44</sup>       | 56 (31/25)    | 59.6  | Proteinuria < 10g/24h; Scr < 265 µmol/L                       | T: San Huang Yi Shen granule 1 bag bid + irbesartan simulant<br>C: placebo + irbesartan                                                  | 3m  | GFR                                        |
| Li J (2012) <sup>45, 46</sup>    | 315 (194/121) | 58.1  | Proteinuria <10g/24h; Scr < 265 µmol/L or GFR > 40 mL/min;    | T: Modified Qi Wei granule 4.5g bid<br>C: placebo + irbesartan                                                                           | 24m | Mortality; Composite endpoints; QoL        |
| Lin L (2000) <sup>47</sup>       | 119 (46/73)   | 55.3  | Proteinuria < 0.5 g/24h; Normal Scr level                     | T: Tang Wei Kang capsule 2g tid<br>C: Captopril (same appearance as herbal capsule)                                                      | 3m  | UAE; FBG; A1C; TC; TG; HDLC                |

Abbreviation: M/F, male versus female; NS, not specified in the original reports; T, tested group; C, control group; qd, once daily; bid, twice daily; tid, thrice daily; m, months; Scr, serum creatinine concentration; Ccr, creatinine clearance rate; GFR, glomerular filtration rate; UAE, urinary albuminuria excretion; 24hUP, 24-hour proteinuria; FBG, fasting blood glucose; A1C, glycated haemoglobin; TC, total cholesterol; TG, triglycerides; LDLC, low-density lipoprotein cholesterol; HDL-C, high-density lipoprotein cholesterol; SBP, systolic blood pressure; DBP, diastolic blood pressure; QoL, quality of life.

**Table 2: Summary of Findings Table**

| Outcomes                                                      | Anticipated absolute effects* (95% CI) |                                                                                                 | Relative effect (95% CI)  | No. of participants (studies) | Quality of the evidence (GRADE)     |
|---------------------------------------------------------------|----------------------------------------|-------------------------------------------------------------------------------------------------|---------------------------|-------------------------------|-------------------------------------|
|                                                               | Risk with Placebo                      | Risk with CHM                                                                                   |                           |                               |                                     |
| <b>Comparison 1: CHM versus Placebo</b>                       |                                        |                                                                                                 |                           |                               |                                     |
| Albuminuria                                                   | -                                      | SMD 0.92 lower<br>(1.35 lower to 0.51 lower)                                                    | -                         | 1021<br>(8 RCTs)              | ⊕⊕⊕○<br>MODERATE <sup>a, b</sup>    |
| follow up: range<br>2 to 12 months                            |                                        |                                                                                                 |                           |                               |                                     |
| 24-hour proteinuria                                           | -                                      | SMD 1.34 lower<br>(2.18 lower to 0.51 lower)                                                    | -                         | 699<br>(4 RCTs)               | ⊕⊕○○<br>LOW <sup>a, b, c</sup>      |
| follow up: range<br>2 to 3 months                             |                                        |                                                                                                 |                           |                               |                                     |
| Serum creatinine (Scr)                                        | The mean Scr was 77.41 μmol/L          | The mean Scr in the intervention group was 5.75 μmol/L higher<br>(2.06 lower to 13.57 higher)   | -                         | 85<br>(2 RCTs)                | ⊕⊕⊕○<br>MODERATE <sup>a, d</sup>    |
| follow up: range<br>3 to 6 months                             |                                        |                                                                                                 |                           |                               |                                     |
| Estimated glomerular filtration rate (eGFR)                   | The mean eGFR was 96.24 mL/min         | The mean eGFR in the intervention group was 10.71 mL/min lower<br>(23.93 lower to 2.51 higher)  | -                         | 44<br>(1 RCT)                 | ⊕⊕○○<br>LOW <sup>a, d</sup>         |
| follow up: mean<br>3 months                                   |                                        |                                                                                                 |                           |                               |                                     |
| <b>Comparison 2: Placebo + ACEi/ ARB versus CHM +ACEi/ARB</b> |                                        |                                                                                                 |                           |                               |                                     |
| Albuminuria                                                   | -                                      | SMD 0.56 lower<br>(1.04 lower to 0.08 lower)                                                    | -                         | 330<br>(3 RCTs)               | ⊕⊕⊕○<br>MODERATE <sup>d, e</sup>    |
| follow up: range<br>3 to 6 months                             |                                        |                                                                                                 |                           |                               |                                     |
| 24h-proteinuria                                               | -                                      | SMD 0.15 lower<br>(0.52 lower to 0.23 higher)                                                   | -                         | 489<br>(4 RCTs)               | ⊕⊕○○<br>LOW <sup>b, d, e</sup>      |
| follow up: range<br>3 to 6 months                             |                                        |                                                                                                 |                           |                               |                                     |
| Serum creatinine (Scr)                                        | The mean Scr was 88.13 μmol/L          | The mean Scr in the intervention group was 4.02 μmol/L lower<br>(7.81 lower to 0.23 lower)      | -                         | 595<br>(5 RCTs)               | ⊕⊕⊕○<br>MODERATE <sup>a, c</sup>    |
| follow up: range<br>3 to 6 months                             |                                        |                                                                                                 |                           |                               |                                     |
| Estimated glomerular filtration rate (eGFR)                   | The mean eGFR was 79.27 mL/min         | The mean eGFR in the intervention group was 6.28 mL/min higher<br>(2.42 higher to 10.14 higher) | -                         | 535<br>(4 RCTs)               | ⊕⊕⊕○<br>MODERATE <sup>c, e</sup>    |
| follow up: range<br>3 to 6 months                             |                                        |                                                                                                 |                           |                               |                                     |
| <b>Comparison 3: CHM versus Placebo + ACEi/ ARB</b>           |                                        |                                                                                                 |                           |                               |                                     |
| All-cause mortality                                           | 0 per 1,000                            | 0 per 1,000<br>(0 to 0)                                                                         | not estimable             | 315<br>(1 RCT)                | ⊕⊕⊕○<br>MODERATE <sup>f</sup>       |
| follow up: mean<br>24 months                                  |                                        |                                                                                                 |                           |                               |                                     |
| Composite end-points events                                   | 133 per 1,000                          | 45 per 1,000<br>(20 to 102)                                                                     | RR 0.34<br>(0.15 to 0.77) | 315<br>(1 RCT)                | ⊕⊕○○<br>LOW <sup>d, g</sup>         |
| follow up: mean<br>24 months                                  |                                        |                                                                                                 |                           |                               |                                     |
| Albuminuria                                                   | -                                      | SMD 6.38 lower<br>(9.01 lower to 3.75 lower)                                                    | -                         | 499<br>(3 RCTs)               | ⊕○○○<br>VERY LOW <sup>a, b, d</sup> |
| follow up: mean<br>3 months                                   |                                        |                                                                                                 |                           |                               |                                     |
| 24h-proteinuria                                               | -                                      | SMD 0.00 lower<br>(0.32 lower to 0.32 higher)                                                   | -                         | 260<br>(2 RCTs)               | ⊕⊕⊕○<br>LOW <sup>d, h</sup>         |
| follow up: range                                              |                                        |                                                                                                 |                           |                               |                                     |

|                                                                            |                                           |                                                                                                     |   |              |                           |                          |
|----------------------------------------------------------------------------|-------------------------------------------|-----------------------------------------------------------------------------------------------------|---|--------------|---------------------------|--------------------------|
| 1 to 3 months                                                              |                                           |                                                                                                     |   |              |                           |                          |
| Serum creatinine (Scr) follow up: range 1 to 3 months                      | The mean Scr was 105.52 $\mu\text{mol/L}$ | The mean Scr in the intervention group was 4.05 $\mu\text{mol/L}$ lower (6.09 lower to 2.01 higher) | - | 590 (4 RCTs) | $\oplus\oplus\oplus\circ$ | MODERATE <sup>a, c</sup> |
| Estimated glomerular filtration rate (eGFR) follow up: range 1 to 3 months | The mean eGFR was 97.24 mL/min            | The mean eGFR in the intervention group was 0.57 mL/min lower (11.01 lower to 9.88 higher)          | - | 542 (4 RCTs) | $\oplus\oplus\circ\circ$  | LOW <sup>a, b, c</sup>   |

\*The risk in the intervention group (and its 95% confidence interval) is based on the assumed risk in the comparison group and the relative effect of the intervention (and its 95% CI).

Abbreviation: Confidence interval (CI); Mean difference (MD); Standardised mean difference (SMD); Risk ratio (RR)  
 GRADE justification: a. Unclear risk of bias of randomization and allocation concealment; b. Significant heterogeneity; c. Wide confidence interval; d. Small sample size and wide confidence interval; e. High or unclear risk of attrition bias; f. Low events rate lead to imprecise estimation and small simple size; g. Number of patients progressed to ESRD were included in composite outcomes, not solely reported; h. Unclear risk of attrition bias and potential selecting report bias;

## Figure Legends

**Figure 1. PRISMA flowchart of searching and screening.**

**Figure 2. Risk-of-bias summary**

**Figure 3. Forest plot of primary outcomes**

Note: Panel (a) albuminuria outcomes; (b) proteinuria outcomes; (c) serum creatinine outcomes; (d) estimated glomerulus filtration rate outcomes.

Abbreviation: CHM, Chinese herbal medicine; ACEi, angiotensin converting enzyme inhibitors; ARB, angiotensin receptor blockers; Std, standard.



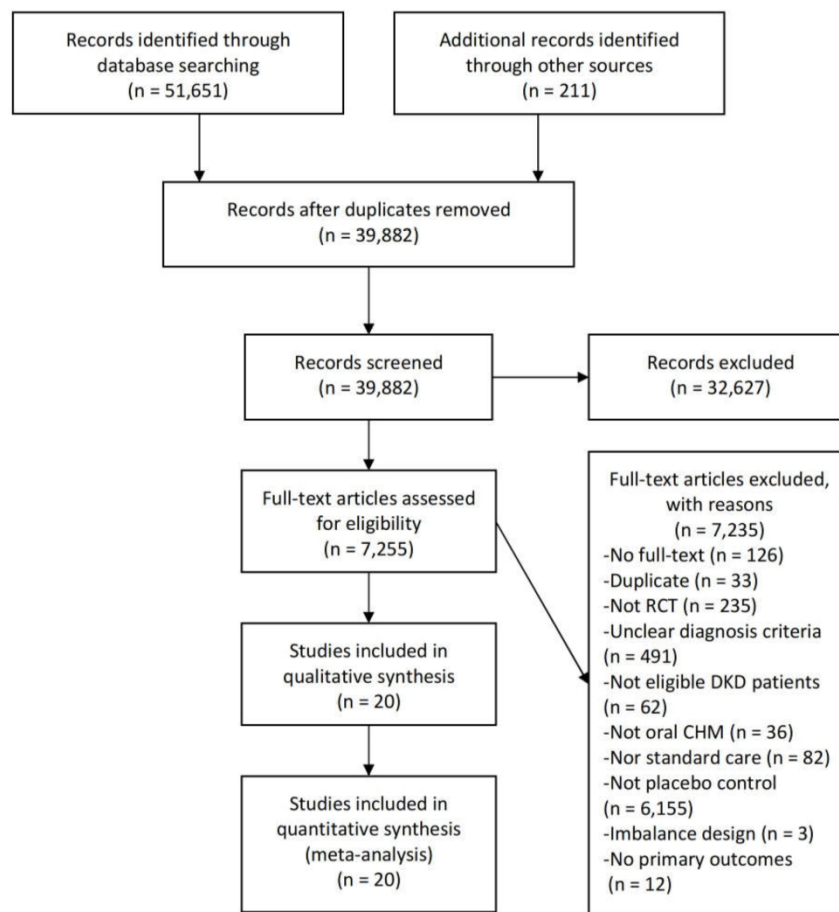

Figure 1. PRISMA flowchart of searching and screening.

1  
2  
3  
4  
5  
6  
7  
8  
9  
10  
11  
12  
13  
14  
15  
16  
17  
18  
19  
20  
21  
22  
23  
24  
25  
26  
27  
28  
29  
30  
31  
32  
33  
34  
35  
36  
37  
38  
39  
40  
41  
42  
43  
44  
45  
46  
47  
48  
49  
50  
51  
52  
53  
54  
55  
56  
57  
58  
59  
60

|               | Random sequence generation (selection bias) | Allocation concealment (selection bias) | Blinding of participants and personnel (performance bias) | Blinding of outcome assessment (detection bias) | Incomplete outcome data (attrition bias) | Selective reporting (reporting bias) | Other bias |
|---------------|---------------------------------------------|-----------------------------------------|-----------------------------------------------------------|-------------------------------------------------|------------------------------------------|--------------------------------------|------------|
| Fan YW 2010   | +                                           | +                                       | +                                                         | +                                               | ?                                        | +                                    | +          |
| Gao YB 2006   | ?                                           | ?                                       | +                                                         | +                                               | +                                        | +                                    | ?          |
| Gao YB 2017   | ?                                           | ?                                       | +                                                         | +                                               | +                                        | ?                                    | +          |
| Han YL 2014   | +                                           | ?                                       | +                                                         | +                                               | +                                        | ?                                    | ?          |
| Jia M 2015    | +                                           | +                                       | +                                                         | +                                               | +                                        | +                                    | +          |
| Jia XL 2012   | ?                                           | ?                                       | +                                                         | +                                               | +                                        | ?                                    | +          |
| Li J 2012     | +                                           | +                                       | +                                                         | +                                               | +                                        | +                                    | ?          |
| Lin L 2000    | ?                                           | ?                                       | +                                                         | +                                               | +                                        | ?                                    | +          |
| Li P 2015     | +                                           | +                                       | +                                                         | +                                               | +                                        | +                                    | +          |
| Liu YF 2015   | ?                                           | ?                                       | +                                                         | +                                               | +                                        | +                                    | +          |
| Ma ST 2011a   | +                                           | ?                                       | +                                                         | +                                               | +                                        | ?                                    | +          |
| Ma ST 2011b   | +                                           | ?                                       | +                                                         | +                                               | +                                        | ?                                    | +          |
| Ni Q 2013     | +                                           | +                                       | +                                                         | +                                               | +                                        | ?                                    | ?          |
| Wei N 2012    | ?                                           | ?                                       | +                                                         | +                                               | +                                        | ?                                    | ?          |
| Wei X 2016    | +                                           | ?                                       | +                                                         | +                                               | +                                        | +                                    | +          |
| Xie SF 2011   | ?                                           | ?                                       | +                                                         | +                                               | +                                        | ?                                    | ?          |
| Yang L 2014   | +                                           | ?                                       | +                                                         | +                                               | +                                        | ?                                    | ?          |
| Yang M 2017   | +                                           | +                                       | ?                                                         | +                                               | +                                        | ?                                    | +          |
| Zhang LF 2006 | +                                           | ?                                       | +                                                         | +                                               | ?                                        | +                                    | +          |
| Zhou JX 2014  | ?                                           | ?                                       | +                                                         | +                                               | +                                        | ?                                    | +          |

Figure 2. Risk-of-bias summary

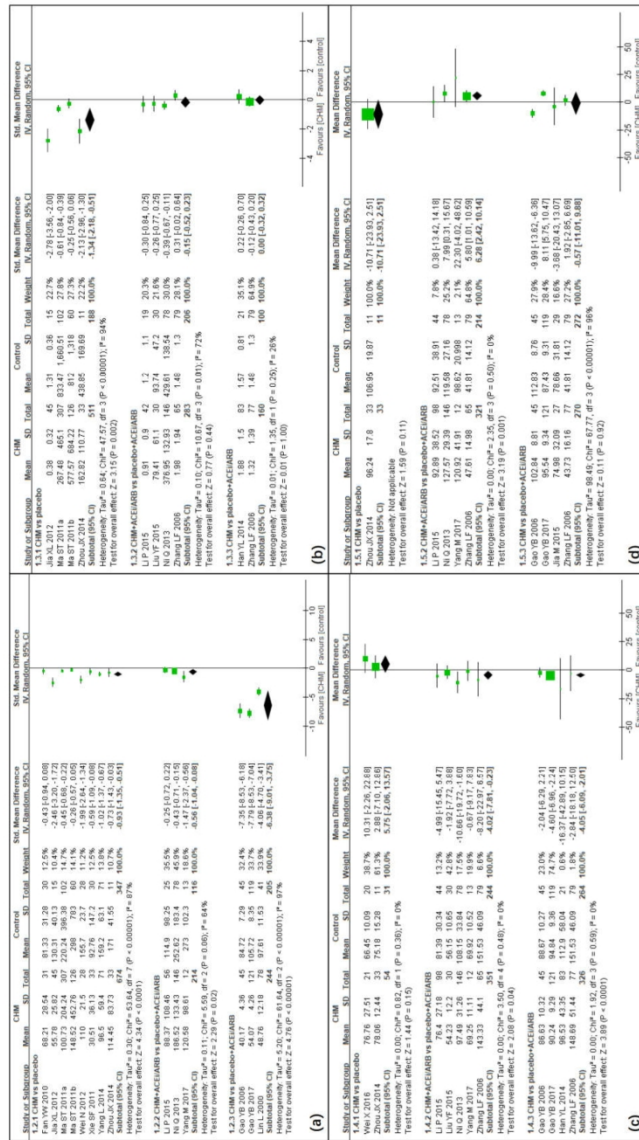

1  
2  
3  
4  
5  
6  
7  
8  
9  
10  
11  
12  
13  
14  
15  
16  
17  
18  
19  
20  
21  
22  
23  
24  
25  
26  
27  
28  
29  
30  
31  
32  
33  
34  
35  
36  
37  
38  
39  
40  
41  
42  
43  
44  
45  
46  
47  
48  
49  
50  
51  
52  
53  
54  
55  
56  
57  
58  
59  
60

# Chinese Herbal Medicine for Diabetic Kidney Disease: A Systematic Review and Meta-analysis of Randomised Placebo-controlled Trials

## Supplementary Appendix

- Table S1: Search strategy of MEDLINE.  
Table S2: Herbal ingredients used in included studies  
Table S3: Subgroup analysis of primary outcomes  
Table S4: Sensitivity analysis of primary outcomes  
Table S5: Meta-analysis results of secondary outcomes

**Table S1: Search Strategy of MEDLINE**

| Search Block | Search terms                                                                                                                                                                                                                                                                                                                                                                                                                                                   |
|--------------|----------------------------------------------------------------------------------------------------------------------------------------------------------------------------------------------------------------------------------------------------------------------------------------------------------------------------------------------------------------------------------------------------------------------------------------------------------------|
| Intervention | Traditional Chinese Medicine OR Chinese Traditional Medicine OR Chinese Herbal Drugs OR Chinese Drugs, Plant OR Medicine, Traditional OR Ethnopharmacology OR Ethnomedicine OR Ethnobotany OR Medicine, Kampo OR Kanpo OR TCM OR Medicine, Ayurvedic OR Phytotherapy OR Herbology OR Plants, Medicinal OR Plant Preparation OR Plant Extract OR Plants, Medicine OR Materia Medica OR Single Prescription OR Chinese Medicine Herb OR Herbal Medicine OR Herbs |
| Condition    | Diabetic Nephropathies OR Diabetic Nephropathy OR Diabetic Kidney Disease OR Diabetic Kidney Diseases OR Kimmelstiel Wilson Syndrome OR Kimmelstiel Wilson Disease OR Diabetic Glomerulosclerosis OR Nodular Glomerulosclerosis OR Intracapillary Glomerulosclerosis OR albuminuria OR Microalbuminuria OR proteinuria OR Glomerulosclerosis OR Glomerulonephritis OR Kimmelstiel wilson nephropathy OR diabetic nephrosclerosis                               |
| Study design | Systematic[sb] OR "randomized controlled trial"[pt] OR "controlled clinical trial"[pt] OR "randomized"[tiab] OR "placebo"[tiab] OR "drug therapy"[sh] OR "randomly"[tiab] OR "trial"[tiab] OR "groups"[tiab] OR "cohort studies"[mesh] OR "case-control studies"[mesh] OR "comparative study"[pt] OR "risk factors"[mesh] OR "cohort"[tw] OR "compared"[tw] OR "groups"[tw] OR "case control"[tw] OR "multivariate"[tw] OR "case series"[tw]                   |

Note: The three search blocks were connected with Boolean operators 'AND' to build the overall search terms.

**Table S2. Herbal Ingredients Used in Included Studies**

| Study                     | Formulae Name                              | Ingredients                                                                                                                                                                                                                                                                           |
|---------------------------|--------------------------------------------|---------------------------------------------------------------------------------------------------------------------------------------------------------------------------------------------------------------------------------------------------------------------------------------|
| Fan YW (2010)             | Qi Kui granule                             | Astragali Radix; Polygoni Multiflori Radix; Abelmoschi Corolla                                                                                                                                                                                                                        |
| Jia XL (2012)             | Qi Wei granule                             | Astragali Radix; Rehmanniae Radix; Rhei Radix et Rhizoma; Prunellae Spica; Curcumae Rhizoma; Euonymus Alatus; Notoginseng Radix et Rhizoma                                                                                                                                            |
| Ma ST (2011a)             | Arctiin granule                            | Arctii Fructus                                                                                                                                                                                                                                                                        |
| Ma ST (2011b)             | Arctiin granule                            | Arctii Fructus                                                                                                                                                                                                                                                                        |
| Wei N (2012) <sup>1</sup> | Xue Zhi Kang capsule                       | <i>Fermentum Rubrum</i> *                                                                                                                                                                                                                                                             |
| Wei X (2016)              | Gan Di capsue                              | Scutellariae Radix; Astragali Radix; Corni Fructus; Rehmanniae Radix Phyllanthi Fructus; Leonuri Herba Leonuri Herba; Bombyx Batryticatus; Sophorae Flos (stir fry processed)                                                                                                         |
| Xie SF (2011)             | Liu Wei Di Huang pill Ginkgo biloba tablet | Rehmanniae Radix; Corni Fructus; Dioscoreae Rhizoma; Alismatis Rhizoma; Moutan Cortex; Poria; Ginkgo Folium                                                                                                                                                                           |
| Yang L (2014)             | Qi Ming granule                            | Astragali Radix; Puerariae Lobatae Radix; Rehmanniae Radix; Lycii Fructus; Cassiae Semen; Leonuri Fructus; Typhae Pollen; Hirudo                                                                                                                                                      |
| Zhou JX (2014)            | Qi Wei granule                             | Astragali Radix; Rehmanniae Radix; Rhei Radix et Rhizoma; Prunellae Spica; Curcumae Rhizoma; Euonymus Alatus; Notoginseng Radix et Rhizoma                                                                                                                                            |
| Li P (2015)               | Tang Shen granule                          | Astragali Radix; Rehmanniae Radix; Rhei Radix et Rhizoma; Notoginseng Radix et Rhizoma; Euonymus Alatus; Corni Fructus; Aurantii Fructus                                                                                                                                              |
| Liu YF (2015)             | Qi Huang capsule                           | Astragali Radix; Rehmanniae Radix; Ligustri Lucidi Fructus; Hirudo; Bombyx Batryticatus; Eupolyphaga Steleophaga; Rhei Radix et Rhizoma; <i>Gymnema sylvestree</i> *; Sinomenii Caulis; Plantaginis Semen                                                                             |
| Ni Q (2013)               | Qi Yao Xiao Ke capsule                     | Panacis Quinquefolii Radix; Astragali Radix; Rehmanniae Radix; Dioscoreae Rhizoma; Corni Fructus; Lycii Fructus; Ophiopogonis Radix; Anemarrhenae Rhizoma; Trichosanthis Radix; Puerariae Lobatae Radix; Schisandrae Chinensis Fructus Schisandrae Chinensis Fructus; Galla Chinensis |
| Yang M (2017)             | Qi Zhu granule                             | Astragali Radix; Ligustri Lucidi Fructus; Atractylodis Macrocephalae Rhizoma; Abelmoschi Corolla; Rosae laevigatae Fructus Dioscoreae Spongiosae Rhizoma; Paeoniae Radix Rubra; Coptidis Rhizoma                                                                                      |

|                             |                                        |                                                                                                                                                                                                          |
|-----------------------------|----------------------------------------|----------------------------------------------------------------------------------------------------------------------------------------------------------------------------------------------------------|
| Zhang LF (2006)<br>[37, 38] | Modified Qi Wei granule                | Astragali Radix; Rehmanniae Radix; Prunellae Spica; Rhei Radix et Rhizoma; Euonymus Alatus; Epimedii Folium; Corni Fructus; Curcumae Longae Rhizoma                                                      |
| Gao YB (2006)               | Tang Shen Ning granule                 | Astragali Radix; Rehmanniae Radix; Euryales Semen; Corni Fructus; Rhei Radix et Rhizoma; Chuanxiong Rhizoma                                                                                              |
| Gao YB (2017)               | Tang Shen Ning granule                 | Astragali Radix; Euryales Semen; Rosae laevigatae Fructus; Rhei Radix et Rhizoma; Chuanxiong Rhizoma                                                                                                     |
| Han YL (2014)               | Bao Shen pill; Tripterygium glycosides | Not given.                                                                                                                                                                                               |
| Jia M (2015)                | San Huang Yi Shen granule              | Astragali Radix; Curcumae Longae Rhizoma; Rhei Radix et Rhizoma; Chuanxiong Rhizoma; Angelicae Sinensis Radix; Salviae Miltiorrhizae Radix et Rhizoma; Cervi Cornu; Anemarrhenae Rhizoma; Arctii Fructus |
| Li J (2012)                 | Modified Qi Wei granule                | Astragali Radix; Rehmanniae Radix; Prunellae Spica; Rhei Radix et Rhizoma; Euonymus Alatus; Epimedii Folium; Corni Fructus; Curcumae Longae Rhizoma                                                      |
| Lin L (2000)                | Tang Wei Kang capsule                  | Astragali Radix; Ligustri Lucidi Fructus; Rhei Radix et Rhizoma                                                                                                                                          |

Note: All ingredients were standarised based on the Chinese Pharmacopoeia 2015 version. \* Latin names were given due to not included in the Chinese Pharmacopoeia 2015.

**Table S3: Subgroup Analysis of Primary Outcomes**

| Outcome or Subgroup                                              | Studies | Pts | Statistical Method | Effect Estimate (95%CI)    | I <sup>2</sup> | p value  |
|------------------------------------------------------------------|---------|-----|--------------------|----------------------------|----------------|----------|
| <b>Urinary albumin excretion</b>                                 |         |     |                    |                            |                |          |
| <b>Subgroup-CHM formulae</b>                                     |         |     |                    |                            |                |          |
| 4.2.1 Qiwei Granules                                             | 2       | 104 | MD                 | -70.06 [-88.84, -51.28]    | 0%             | p<0.0001 |
| 4.2.2 Arctiin Granules                                           | 2       | 595 | Std. MD            | -0.38 [-0.56, -0.20]       | 0%             | p<0.0001 |
| 4.2.4 Tang shen ning Formulae group                              | 2       | 330 | MD                 | -48.16 [-55.12, -41.20]    | 95%            | p<0.0001 |
| <b>Subgroup-Measurements</b>                                     |         |     |                    |                            |                |          |
| 5.2.1 CHM vs placebo-AER                                         | 1       | 186 | MD                 | -149.48 [-362.79, 63.83]   | NA             | p=0.17   |
| 5.2.2 CHM vs placebo-ACR                                         | 2       | 124 | MD                 | -30.53 [-76.59, 15.53]     | 66%            | p=0.19   |
| 5.2.3 CHM vs placebo-UAE                                         | 5       | 711 | MD                 | -60.91 [-76.82, -45.01]    | 53%            | p<0.0001 |
| 5.2.4 CHM vs placebo + ACEi/ARB-AER                              | 1       | 119 | MD                 | -48.85 [-53.30, -44.40]    | NA             | p<0.0001 |
| 5.2.5 CHM vs placebo + ACEi/ARB-UAE                              | 2       | 330 | MD                 | -48.16 [-55.12, -41.20]    | 95%            | p<0.0001 |
| <b>24-hour proteinuria</b>                                       |         |     |                    |                            |                |          |
| <b>Subgroup-baseline UP</b>                                      |         |     |                    |                            |                |          |
| 3.3.1 CHM vs placebo-baseline UP < 0.5g/d                        | 2       | 453 | MD                 | -378.34 [-649.90, -106.77] | 63%            | p=0.006  |
| 3.3.2 CHM vs placebo-baseline UP > 0.5g/d                        | 2       | 246 | Std. MD            | -1.49 [-3.97, 0.99]        | 97%            | p=0.24   |
| 3.3.3 CHM + ACEi/ARB vs placebo + ACEi/ARB -baseline UP < 0.5g/d | 2       | 284 | MD                 | -31.30 [-68.61, 6.02]      | 61%            | p=0.10   |
| 3.3.4 CHM + ACEi/ARB vs placebo + ACEi/ARB -baseline UP > 0.5g/d | 2       | 205 | MD                 | 0.11 [-0.67, 0.88]         | 74%            | p=0.79   |
| <b>Subgroup-CHM formulae</b>                                     |         |     |                    |                            |                |          |
| 4.3.1 Qiwei Granules                                             | 2       | 104 | Std. MD            | -2.47 [-3.11, -1.83]       | 21%            | p<0.0001 |
| 4.3.2 Arctiin Granules                                           | 2       | 595 | MD                 | -407.65 [-732.24, -83.05]  | 45%            | p=0.01   |
| 4.3.3 Tang shen fang group                                       | 2       | 205 | MD                 | 0.11 [-0.67, 0.88]         | 74%            | p=0.79   |
| <b>Subgroup-Measurements</b>                                     |         |     |                    |                            |                |          |
| 5.3.1 CHM vs placebo-g/24h                                       | 1       | 60  | MD                 | -0.93 [-1.13, -0.73]       | NA             | p<0.0001 |
| 5.3.2 CHM vs placebo-mg/24h                                      | 3       | 639 | MD                 | -324.42 [-485.15, -163.69] | 30%            | p<0.0001 |



|                                                                      |   |     |    |                       |     |          |
|----------------------------------------------------------------------|---|-----|----|-----------------------|-----|----------|
| 5.3.3 CHM + ACEi/ARB vs placebo + ACEi/ARB-g/24h                     | 2 | 205 | MD | 0.11 [-0.67, 0.88]    | 74% | p=0.79   |
| 5.3.4 CHM + ACEi/ARB vs placebo + ACEi/ARB-mg/24h                    | 2 | 284 | MD | -31.30 [-68.61, 6.02] | 61% | p=0.10   |
| <b>Serum creatinine level</b>                                        |   |     |    |                       |     |          |
| <b><i>Subgroup-baseline Scr</i></b>                                  |   |     |    |                       |     |          |
| 3.4.1 CHM + ACEi/ARB vs placebo + ACEi/ARB<br>-baseline Scr normal   | 3 | 227 | MD | -2.12 [-6.48, 2.23]   | 0%  | p=0.34   |
| 3.4.2 CHM + ACEi/ARB vs placebo + ACEi/ARB<br>-baseline Scr abnormal | 2 | 368 | MD | -9.99 [-17.71, -2.26] | 0%  | p=0.01   |
| 3.4.3 CHM vs placebo + ACEi/ARB-baseline Scr normal                  | 3 | 434 | MD | -4.07 [-6.13, -2.01]  | 0%  | p=0.0001 |
| 3.4.4 CHM vs placebo + ACEi/ARB-baseline Scr abnormal                | 1 | 156 | MD | -2.84 [-18.18, 12.50] | NA  | p=0.72   |
| <b><i>Subgroup-CHM formulae</i></b>                                  |   |     |    |                       |     |          |
| 4.4.2 Tang shen fang group                                           | 2 | 286 | MD | -6.06 [-14.60, 2.47]  | 0%  | p=0.16   |
| 4.4.3 Tang shen ning Formulae group                                  | 2 | 330 | MD | -3.96 [-6.13, -1.78]  | 6%  | p=0.0004 |
| <b>Glomerular filtration rate</b>                                    |   |     |    |                       |     |          |
| <b><i>Subgroup-baseline GFR</i></b>                                  |   |     |    |                       |     |          |
| 3.5.1 CHM + ACEi/ARB vs placebo + ACEi/ARB<br>-baseline GFR>90       | 2 | 249 | MD | 9.38 [1.07, 17.70]    | 4%  | p=0.03   |
| 3.5.2 CHM + ACEi/ARB vs placebo + ACEi/ARB<br>-baseline GFR<90       | 2 | 286 | MD | 5.22 [0.69, 9.74]     | 0%  | p=0.02   |
| 3.5.3 CHM vs placebo + ACEi/ARB-baseline GFR>90                      | 1 | 90  | MD | -9.99 [-13.62, -6.36] | NA  | p<0.0001 |
| 3.5.4 CHM vs placebo + ACEi/ARB-baseline GFR<90                      | 3 | 452 | MD | 4.48 [-1.32, 10.28]   | 70% | p=0.13   |
| <b><i>Subgroup-CHM formulae</i></b>                                  |   |     |    |                       |     |          |
| 4.5.2 Tang shen fang group                                           | 2 | 286 | MD | 5.22 [0.69, 9.74]     | 0%  | p=0.02   |
| 4.5.3 Tang shen ning Formulae group                                  | 2 | 330 | MD | -0.89 [-18.62, 16.85] | 99% | p=0.92   |
| <b><i>Subgroup-Measurements</i></b>                                  |   |     |    |                       |     |          |
| 5.5.1 CHM + ACEi/ARB vs placebo + ACEi/ARB-Ccr                       | 1 | 144 | MD | 5.80 [1.01, 10.59]    | NA  | p=0.02   |
| 5.5.2 CHM + ACEi/ARB vs placebo + ACEi/ARB-eGFR                      | 3 | 391 | MD | 7.13 [-0.29, 14.56]   | 11% | p=0.06   |
| 5.5.3 CHM vs placebo + ACEi/ARB-Ccr                                  | 2 | 246 | MD | -4.14 [-15.81, 7.53]  | 93% | p=0.49   |
| 5.5.4 CHM vs placebo + ACEi/ARB-eGFR                                 | 2 | 296 | MD | 5.25 [-4.65, 15.15]   | 46% | p=0.30   |

1  
2  
3 Abbreviation: Pts, patients; CI, confident interval; NA, not applicable. CHM, Chinese herbal medicine; ACEi, angiotensin converting enzyme inhibitors; ARB,  
4 angiotensin receptor blockers; MD, mean differences; Std, standard.; AER, albuminuria excretion rate; ACR, albuminuria to creatinine ratio; UAE, urinary  
5 albuminuria excretion; UP, urinary proteinuria; GFR, glomerular filtration rate; Scr, serum creatinine concentration; Ccr, creatinine clearance.  
6  
7  
8  
9  
10  
11  
12  
13  
14  
15  
16  
17  
18  
19  
20  
21  
22  
23  
24  
25  
26  
27  
28  
29  
30  
31  
32  
33  
34  
35  
36  
37  
38  
39  
40  
41  
42  
43  
44  
45  
46

For peer review only

**Table S4: Sensitivity Analysis of Primary Outcomes**

| Outcomes                          | Studies | Participant<br>s | Statistical Method   | Effect Estimate<br>(95% CI) | I <sup>2</sup> | p value  |
|-----------------------------------|---------|------------------|----------------------|-----------------------------|----------------|----------|
| <b>Urinary albumin excretion</b>  |         |                  |                      |                             |                |          |
| CHM vs placebo                    | 4       | 798              | Std. Mean Difference | -0.54 [-0.85, -0.22]        | 73%            | p=0.0009 |
| CHM+ACEi/ARB vs placebo+ACEi/ARB  | 3       | 330              | Std. Mean Difference | -0.56 [-1.04, -0.08]        | 64%            | p=0.02   |
| <b>24-hour proteinuria</b>        |         |                  |                      |                             |                |          |
| CHM vs placebo                    | 2       | 595              | Mean Difference      | -407.65 [-732.24, -83.05]   | 45%            | p=0.01   |
| CHM+ACEi/ARB vs placebo+ACEi/ARB  | 3       | 429              | Std. Mean Difference | -0.12 [-0.60, 0.37]         | 81%            | p=0.63   |
| CHM vs placebo+ACEi/ARB           | 2       | 260              | Std. Mean Difference | 0.00 [-0.32, 0.32]          | 26%            | p=1.00   |
| <b>Serum creatinine level</b>     |         |                  |                      |                             |                |          |
| CHM vs placebo                    | 1       | 41               | Mean Difference      | 10.31 [-2.26, 22.88]        | NA             | p=0.11   |
| CHM+ACEi/ARB vs placebo+ACEi/ARB  | 4       | 535              | Mean Difference      | -5.59 [-10.61, -0.58]       | 0%             | p=0.03   |
| CHM vs placebo+ACEi/ARB           | 2       | 260              | Mean Difference      | -6.23 [-19.51, 7.05]        | 0%             | p=0.36   |
| <b>Glomerular filtration rate</b> |         |                  |                      |                             |                |          |
| CHM+ACEi/ARB vs placebo+ACEi/ARB  | 4       | 535              | Mean Difference      | 6.28 [2.42, 10.14]          | 0%             | p=0.001  |
| CHM vs placebo+ACEi/ARB           | 2       | 212              | Mean Difference      | 1.50 [-3.08, 6.09]          | 0%             | p=0.52   |

Abbreviation: NA, not applicable. CHM, Chinese herbal medicine; ACEi, angiotensin converting enzyme inhibitors; ARB, angiotensin receptor blockers; Std, standard.

**Table S5: Meta-analysis Results of Secondary Outcomes**

| <b>Outcome</b>                     | <b>Studies</b> | <b>Participants</b> | <b>Statistical Method</b> | <b>Effect Estimate (95% CI)</b> | <b>I<sup>2</sup></b> | <b>p value</b> |
|------------------------------------|----------------|---------------------|---------------------------|---------------------------------|----------------------|----------------|
| 2.1 Fasting blood sugar            | 9              | 962                 | Mean Difference           | -0.45 [-1.15, 0.25]             | 93%                  | p=0.21         |
| 2.2 Haemoglobin A1c                | 8              | 901                 | Mean Difference           | 0.04 [-0.17, 0.24]              | 59%                  | p=0.73         |
| 2.3 Total cholesterol              | 8              | 815                 | Mean Difference           | -0.96 [-1.70, -0.21]            | 95%                  | p=0.01         |
| 2.4 Triglyceride                   | 8              | 815                 | Mean Difference           | -0.60 [-1.01, -0.19]            | 90%                  | p=0.004        |
| 2.5 Low-density lipoprotein        | 7              | 696                 | Mean Difference           | -0.51 [-0.93, -0.09]            | 92%                  | p=0.02         |
| 2.6 High-density lipoprotein       | 8              | 815                 | Mean Difference           | 0.14 [-0.04, 0.33]              | 93%                  | p=0.12         |
| 2.7 Systolic blood pressure        | 3              | 252                 | Mean Difference           | 0.64 [-0.90, 2.17]              | 0%                   | p=0.43         |
| 2.8 Diastolic blood pressure       | 3              | 252                 | Mean Difference           | 0.14 [-2.02, 2.29]              | 52%                  | p=0.90         |
| 2.9 Diabetes quality of life score | 2              | 461                 | Mean Difference           | 0.07 [-3.87, 4.00]              | 54%                  | p=0.97         |

Abbreviation: CI, confident interval.

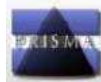

# PRISMA 2009 Checklist

| Section/topic                      | #  | Checklist item                                                                                                                                                                                                                                                                                              | Reported on page # |
|------------------------------------|----|-------------------------------------------------------------------------------------------------------------------------------------------------------------------------------------------------------------------------------------------------------------------------------------------------------------|--------------------|
| <b>TITLE</b>                       |    |                                                                                                                                                                                                                                                                                                             |                    |
| Title                              | 1  | Identify the report as a systematic review, meta-analysis, or both.                                                                                                                                                                                                                                         | P1                 |
| <b>ABSTRACT</b>                    |    |                                                                                                                                                                                                                                                                                                             |                    |
| Structured summary                 | 2  | Provide a structured summary including, as applicable: background; objectives; data sources; study eligibility criteria, participants, and interventions; study appraisal and synthesis methods; results; limitations; conclusions and implications of key findings; systematic review registration number. | P2-3               |
| <b>INTRODUCTION</b>                |    |                                                                                                                                                                                                                                                                                                             |                    |
| Rationale                          | 3  | Describe the rationale for the review in the context of what is already known.                                                                                                                                                                                                                              | P5-6               |
| Objectives                         | 4  | Provide an explicit statement of questions being addressed with reference to participants, interventions, comparisons, outcomes, and study design (PICOS).                                                                                                                                                  | P6                 |
| <b>METHODS</b>                     |    |                                                                                                                                                                                                                                                                                                             |                    |
| Protocol and registration          | 5  | Indicate if a review protocol exists, if and where it can be accessed (e.g., Web address), and, if available, provide registration information including registration number.                                                                                                                               | P7                 |
| Eligibility criteria               | 6  | Specify study characteristics (e.g., PICOS, length of follow-up) and report characteristics (e.g., years considered, language, publication status) used as criteria for eligibility, giving rationale.                                                                                                      | P8-9               |
| Information sources                | 7  | Describe all information sources (e.g., databases with dates of coverage, contact with study authors to identify additional studies) in the search and date last searched.                                                                                                                                  | P8                 |
| Search                             | 8  | Present full electronic search strategy for at least one database, including any limits used, such that it could be repeated.                                                                                                                                                                               | Table S1           |
| Study selection                    | 9  | State the process for selecting studies (i.e., screening, eligibility, included in systematic review, and, if applicable, included in the meta-analysis).                                                                                                                                                   | P9                 |
| Data collection process            | 10 | Describe method of data extraction from reports (e.g., piloted forms, independently, in duplicate) and any processes for obtaining and confirming data from investigators.                                                                                                                                  | P9-10              |
| Data items                         | 11 | List and define all variables for which data were sought (e.g., PICOS, funding sources) and any assumptions and simplifications made.                                                                                                                                                                       | P9-10              |
| Risk of bias in individual studies | 12 | Describe methods used for assessing risk of bias of individual studies (including specification of whether this was done at the study or outcome level), and how this information is to be used in any data synthesis.                                                                                      | P10-11             |
| Summary measures                   | 13 | State the principal summary measures (e.g., risk ratio, difference in means).                                                                                                                                                                                                                               | P10                |
| Synthesis of results               | 14 | Describe the methods of handling data and combining results of studies, if done, including measures of consistency (e.g., $I^2$ ) for each meta-analysis.                                                                                                                                                   | P10                |

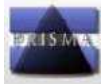

# PRISMA 2009 Checklist

Page 1 of 2

| Section/topic                 | #  | Checklist item                                                                                                                                                                                           | Reported on page #  |
|-------------------------------|----|----------------------------------------------------------------------------------------------------------------------------------------------------------------------------------------------------------|---------------------|
| Risk of bias across studies   | 15 | Specify any assessment of risk of bias that may affect the cumulative evidence (e.g., publication bias, selective reporting within studies).                                                             | P11                 |
| Additional analyses           | 16 | Describe methods of additional analyses (e.g., sensitivity or subgroup analyses, meta-regression), if done, indicating which were pre-specified.                                                         | P10                 |
| <b>RESULTS</b>                |    |                                                                                                                                                                                                          |                     |
| Study selection               | 17 | Give numbers of studies screened, assessed for eligibility, and included in the review, with reasons for exclusions at each stage, ideally with a flow diagram.                                          | P11-12<br>Fig.1     |
| Study characteristics         | 18 | For each study, present characteristics for which data were extracted (e.g., study size, PICOS, follow-up period) and provide the citations.                                                             | P12<br>Table 1      |
| Risk of bias within studies   | 19 | Present data on risk of bias of each study and, if available, any outcome level assessment (see item 12).                                                                                                | P12-13,<br>Fig2     |
| Results of individual studies | 20 | For all outcomes considered (benefits or harms), present, for each study: (a) simple summary data for each intervention group (b) effect estimates and confidence intervals, ideally with a forest plot. | P13-18,<br>Fig 3    |
| Synthesis of results          | 21 | Present results of each meta-analysis done, including confidence intervals and measures of consistency.                                                                                                  | P13-18,<br>Appendix |
| Risk of bias across studies   | 22 | Present results of any assessment of risk of bias across studies (see Item 15).                                                                                                                          | Table 2             |
| Additional analysis           | 23 | Give results of additional analyses, if done (e.g., sensitivity or subgroup analyses, meta-regression [see Item 16]).                                                                                    | P18-19<br>Appendix  |
| <b>DISCUSSION</b>             |    |                                                                                                                                                                                                          |                     |
| Summary of evidence           | 24 | Summarize the main findings including the strength of evidence for each main outcome; consider their relevance to key groups (e.g., healthcare providers, users, and policy makers).                     | P19-22              |
| Limitations                   | 25 | Discuss limitations at study and outcome level (e.g., risk of bias), and at review-level (e.g., incomplete retrieval of identified research, reporting bias).                                            | P22-23              |
| Conclusions                   | 26 | Provide a general interpretation of the results in the context of other evidence, and implications for future research.                                                                                  | P22-23              |
| <b>FUNDING</b>                |    |                                                                                                                                                                                                          |                     |
| Funding                       | 27 | Describe sources of funding for the systematic review and other support (e.g., supply of data); role of funders for the systematic review.                                                               | P24                 |

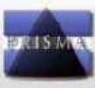

# PRISMA 2009 Checklist

1  
2  
3  
4  
5  
6  
7  
8  
9  
10  
11  
12  
13  
14  
15  
16  
17  
18  
19  
20  
21  
22  
23  
24  
25  
26  
27  
28  
29  
30  
31  
32  
33  
34  
35  
36  
37  
38  
39  
40  
41  
42  
43  
44  
45  
46  
47

*From:* Moher D, Liberati A, Tetzlaff J, Altman DG, The PRISMA Group (2009). Preferred Reporting Items for Systematic Reviews and Meta-Analyses: The PRISMA Statement. PLoS Med 6(6): e1000097. doi:10.1371/journal.pmed1000097

For more information, visit: [www.prisma-statement.org](http://www.prisma-statement.org).

Page 2 of 2

For peer review only

# BMJ Open

## Chinese Herbal Medicine for Diabetic Kidney Disease: A Systematic Review and Meta-analysis of Randomised Placebo-controlled Trials

|                               |                                                                                                                                                                                                                                                                                                                                                                                                                                                                                                                                                                                                                                                                                                                                                                                                                                                                                                                                                                                                                                                                                                                                                                                                                                                                                                                                                                                                                                                                                                                                                                                                                                                                                                                                                                                                                                                                                                                                                                                                                                                                                                                                                                                                                                                                                                                                                                                             |
|-------------------------------|---------------------------------------------------------------------------------------------------------------------------------------------------------------------------------------------------------------------------------------------------------------------------------------------------------------------------------------------------------------------------------------------------------------------------------------------------------------------------------------------------------------------------------------------------------------------------------------------------------------------------------------------------------------------------------------------------------------------------------------------------------------------------------------------------------------------------------------------------------------------------------------------------------------------------------------------------------------------------------------------------------------------------------------------------------------------------------------------------------------------------------------------------------------------------------------------------------------------------------------------------------------------------------------------------------------------------------------------------------------------------------------------------------------------------------------------------------------------------------------------------------------------------------------------------------------------------------------------------------------------------------------------------------------------------------------------------------------------------------------------------------------------------------------------------------------------------------------------------------------------------------------------------------------------------------------------------------------------------------------------------------------------------------------------------------------------------------------------------------------------------------------------------------------------------------------------------------------------------------------------------------------------------------------------------------------------------------------------------------------------------------------------|
| Journal:                      | <i>BMJ Open</i>                                                                                                                                                                                                                                                                                                                                                                                                                                                                                                                                                                                                                                                                                                                                                                                                                                                                                                                                                                                                                                                                                                                                                                                                                                                                                                                                                                                                                                                                                                                                                                                                                                                                                                                                                                                                                                                                                                                                                                                                                                                                                                                                                                                                                                                                                                                                                                             |
| Manuscript ID                 | bmjopen-2018-025653.R1                                                                                                                                                                                                                                                                                                                                                                                                                                                                                                                                                                                                                                                                                                                                                                                                                                                                                                                                                                                                                                                                                                                                                                                                                                                                                                                                                                                                                                                                                                                                                                                                                                                                                                                                                                                                                                                                                                                                                                                                                                                                                                                                                                                                                                                                                                                                                                      |
| Article Type:                 | Research                                                                                                                                                                                                                                                                                                                                                                                                                                                                                                                                                                                                                                                                                                                                                                                                                                                                                                                                                                                                                                                                                                                                                                                                                                                                                                                                                                                                                                                                                                                                                                                                                                                                                                                                                                                                                                                                                                                                                                                                                                                                                                                                                                                                                                                                                                                                                                                    |
| Date Submitted by the Author: | 07-Feb-2019                                                                                                                                                                                                                                                                                                                                                                                                                                                                                                                                                                                                                                                                                                                                                                                                                                                                                                                                                                                                                                                                                                                                                                                                                                                                                                                                                                                                                                                                                                                                                                                                                                                                                                                                                                                                                                                                                                                                                                                                                                                                                                                                                                                                                                                                                                                                                                                 |
| Complete List of Authors:     | <p>Zhang, La; The Second Affiliated Hospital of Guangzhou University of Chinese Medicine, Guangdong Provincial Hospital of Chinese Medicine, and Guangdong Provincial Academy of Chinese Medical Sciences; RMIT University, The China-Australia International Research Centre for Chinese Medicine</p> <p>Yang, Lihong; The Second Affiliated Hospital of Guangzhou University of Chinese Medicine, Guangdong Provincial Hospital of Chinese Medicine, and Guangdong Provincial Academy of Chinese Medical Sciences; RMIT University, The China-Australia International Research Centre for Chinese Medicine</p> <p>Shergis, Johannah; RMIT University,</p> <p>Zhang, Lei; The Second Affiliated Hospital of Guangzhou University of Chinese Medicine, Guangdong Provincial Hospital of Chinese Medicine, and Guangdong Provincial Academy of Chinese Medical Sciences</p> <p>Zhang, Anthony; RMIT University, Health Sciences</p> <p>Guo, Xinfeng; The Second Affiliated Hospital of Guangzhou University of Chinese Medicine, Guangdong Provincial Hospital of Chinese Medicine, and Guangdong Provincial Academy of Chinese Medical Sciences; RMIT University, The China-Australia International Research Centre for Chinese Medicine</p> <p>Qin, Xindong; The Second Affiliated Hospital of Guangzhou University of Chinese Medicine, Guangdong Provincial Hospital of Chinese Medicine, and Guangdong Provincial Academy of Chinese Medical Sciences</p> <p>Johnson, David; University of Queensland, Australia Kidney Trials Network; Translational Research Institute</p> <p>Liu, Xusheng; The Second Affiliated Hospital of Guangzhou University of Chinese Medicine, Guangdong Provincial Hospital of Chinese Medicine, and Guangdong Provincial Academy of Chinese Medical Sciences</p> <p>Lu, Chuan-jian ; The Second Affiliated Hospital of Guangzhou University of Chinese Medicine, Guangdong Provincial Hospital of Chinese Medicine, and Guangdong Provincial Academy of Chinese Medical Sciences; Guangdong Provincial Key Laboratory of Clinical Research on Traditional Chinese Medicine Syndrome</p> <p>Xue, Charlie; RMIT University, Health Sciences</p> <p>Mao, Wei; The Second Affiliated Hospital of Guangzhou University of Chinese Medicine, Guangdong Provincial Hospital of Chinese Medicine, and Guangdong Provincial Academy of Chinese Medical Sciences</p> |
| <b>Primary Subject            | Complementary medicine                                                                                                                                                                                                                                                                                                                                                                                                                                                                                                                                                                                                                                                                                                                                                                                                                                                                                                                                                                                                                                                                                                                                                                                                                                                                                                                                                                                                                                                                                                                                                                                                                                                                                                                                                                                                                                                                                                                                                                                                                                                                                                                                                                                                                                                                                                                                                                      |



1  
2  
3  
4  
5  
6  
7  
8  
9  
10  
11  
12  
13  
14  
15  
16  
17  
18  
19  
20  
21  
22  
23  
24  
25  
26  
27  
28  
29  
30  
31  
32  
33  
34  
35  
36  
37  
38  
39  
40  
41  
42  
43  
44  
45  
46  
47  
48  
49  
50  
51  
52  
53  
54  
55  
56  
57  
58  
59  
60

|                            |                                                                                                                            |
|----------------------------|----------------------------------------------------------------------------------------------------------------------------|
| Heading                    |                                                                                                                            |
| Secondary Subject Heading: | Diabetes and endocrinology, Evidence based practice, Renal medicine, Pharmacology and therapeutics                         |
| Keywords:                  | diabetic kidney disease, Chinese herbal medicine, complementary and alternative medicine, systematic review, meta-analysis |
|                            |                                                                                                                            |

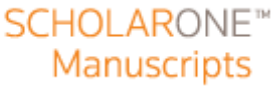

**Title****Chinese Herbal Medicine for Diabetic Kidney Disease: A Systematic Review and Meta-analysis of Randomised Placebo-controlled Trials****Authors<sup>1</sup>**

La Zhang, M.Med., <sup>1,2</sup> Lihong Yang, M.Med., <sup>1,2</sup> Johannah Shergis, Ph.D., <sup>2</sup> Lei Zhang, M.D., <sup>1</sup> Anthony Lin Zhang, Ph.D., <sup>2</sup> Xinfeng Guo, M.D., <sup>1,2</sup> Xindong Qin, M.Med., <sup>1</sup> David Johnson, Ph.D., <sup>3-5</sup> Xusheng Liu, M.Med., <sup>1</sup> Chuanjian Lu, M.D., <sup>1,6</sup> Charlie Changli Xue, Ph.D., <sup>2</sup> Wei Mao, M.D. <sup>1</sup>

1. The Second Affiliated Hospital of Guangzhou University of Chinese Medicine, Guangdong Provincial Hospital of Chinese Medicine, and Guangdong Provincial Academy of Chinese Medical Sciences, Guangzhou, China
2. The China-Australia International Research Centre for Chinese Medicine, School of Health and Biomedical Sciences, Royal Melbourne Institute of Technology, Melbourne, Australia
3. Australia Kidney Trials Network, University of Queensland, Brisbane, Australia
4. Department of Nephrology, Princess Alexandra Hospital, Brisbane, Australia
5. Translational Research Institute, Brisbane, Australia
6. Guangdong Provincial Key Laboratory of Clinical Research on Traditional Chinese Medicine Syndrome, Guangzhou, China

**Corresponding Authors<sup>2</sup>**

Wei Mao, M.D.

Email: [maowei1274@126.com](mailto:maowei1274@126.com)

Phone: +86 020 8188 7233

Address: 111 Da De Road, Guangzhou, Guangdong Province, 510120, China

Charlie Changli Xue, Ph.D.

Email: [charlie.xue@rmit.edu.au](mailto:charlie.xue@rmit.edu.au)

Phone: +613 9925 7360

Fax: +613 9925 6539

Address: RMIT University, PO Box 71, Bundoora, Vic. 3083, Australia

**Word counts**

Abstract: 350 words

Manuscript body: 4,918 words

---

<sup>1</sup> La Zhang and Lihong Yang contributed equally to this paper as first authors.

<sup>2</sup> Charlie Changli Xue and Wei Mao contributed equally to this paper as corresponding authors.

## ABSTRACT

### Objectives

To provide a broad evaluation of the efficacy and safety of oral Chinese herbal medicine (CHM) as an adjunctive treatment for diabetic kidney disease (DKD), including mortality, progression to end stage renal disease (ESKD), albuminuria, proteinuria and kidney function.

### Design

A systematic review and meta-analysis.

### Methods

Randomised controlled trials (RCTs) comparing oral CHM with placebo as an additional intervention to conventional treatments were retrieved from five English (CENTRAL, MEDLINE, Embase, AMED and CINAHL) and four Chinese databases (CBM, CNKI, CQVIP and Wanfang) from inception to May 2018. RCTs recruiting adult DKD patients induced by primary diabetes were considered eligible, regardless of the form and ingredients of oral CHM. Mean difference (MD) or standardised mean difference (SMD) was used to analyse continuous variables and risk ratio (RR) for dichotomous data, both with 95% confidence intervals (CIs).

### Results

From 7,255 reports retrieved, 20 eligible studies involving 2,719 DKD patients were included. CHM was associated with greater reduction of albuminuria than placebo, regardless of whether renin-angiotensin system (RAS) inhibitors were concurrently administered (SMD -0.56, 95%CI [-1.04, -0.08],  $I^2=64\%$ ,  $p=0.002$ ) or not (SMD -0.92, 95%CI [-1.35, -0.51],  $I^2=87\%$ ,  $p<0.0001$ ). When CHM was used as an adjunct to RAS inhibitors, estimated glomerular filtration rate (eGFR) was higher in the CHM than placebo group (MD 6.28 mL/min; 95%CI [2.42, 10.14],  $I^2=0\%$ ,  $p=0.001$ ). The effects

1  
2  
3 of CHM on progression to ESKD and mortality were uncertain due to low event rates.  
4  
5 The reported adverse events in CHM group included digestive disorders, elevated liver  
6  
7 enzyme level, infection, anemia, hypertension and subarachnoid hemorrhage, but the  
8  
9 report rates were low and similar to control groups. The favourable results of CHM  
10  
11 should be balanced with the limitations of the included studies such as high  
12  
13 heterogeneity, short follow-up periods, small numbers of clinical events, and older  
14  
15 patients with less advanced disease.  
16  
17

### 18 19 **Conclusions**

20  
21 Based on moderate to low quality evidence, CHM may have beneficial effects on renal  
22  
23 function and albuminuria beyond that afforded by conventional treatment in adults with  
24  
25 DKD. Further well-conducted, adequately powered trials with representative DKD  
26  
27 populations are warranted to confirm the long-term effect of CHM, particularly on  
28  
29 clinically relevant outcomes.  
30  
31  
32  
33  
34

35 **PROSPERO registration number:** CRD42015029293  
36  
37  
38  
39

40 **Index words:** diabetic kidney disease (DKD); Chinese herbal medicine (CHM);  
41  
42 complementary and alternative medicine; systematic review; meta-analysis  
43  
44  
45  
46  
47  
48  
49  
50  
51  
52  
53  
54  
55  
56  
57  
58  
59  
60

## ARTICLE SUMMARY

### Strengths and limitations of this study

- This systematic review and meta-analysis provided a broad review of the efficacy and safety of oral Chinese herbal medicine (CHM) for diabetic kidney disease.
- Randomised controlled trials comparing CHM to placebo were included to avoid potential risk of bias that may exaggerate the estimated effect of CHM.
- The search strategy was comprehensive, over 7,000 articles were screened and 20 studies included with a total of 2,719 participants.
- A priori subgroups analysis was performed to provide potential candidate formulae and frequently used herbs for further investigation.
- Overall the evidence was moderate to very low quality due to unclear randomisation procedures, wide confidence interval and substantial heterogeneity in outcome measures. The external validity was compromised by multi-ingredient herbal formulae, short follow-up periods, small numbers of clinical events, and inclusion of older patients with less advanced disease.

## INTRODUCTION

Diabetic kidney disease (DKD) is one of the most common complications of diabetes. As the prevalence of diabetes continues to grow globally, it is estimated that the number of DKD patients will double by 2025<sup>1</sup>. Since patients with DKD are at markedly higher risks of progression to end stage kidney disease (ESKD) and cardiovascular disease (CVD), the socioeconomic and public health burden of DKD is significant<sup>2,3</sup>. Effective therapies that prevent and treat DKD are of critical importance.

Glycemic management, blood pressure control and the renin-angiotensin system (RAS) inhibitors are the mainstay of treatment for DKD and have been successful in reducing risk of disease onset or progression<sup>4,5</sup>. However, an unmet need exists in DKD patients intolerant or unresponsive to current pharmacotherapies, and those patients with deteriorating renal function yet normo-albuminuria<sup>6-8</sup>. Some promising therapies addressing novel targets, such as sulodexide and bardoxolone methyl, have been found to be ineffective and/or harmful, whilst several others, including sodium-glucose cotransporter 2 (SGLT-2) inhibitors and mineralocorticoid receptor antagonist are still under evaluation<sup>9-11</sup>.

To facilitate the discovery of new therapeutic agents for patients with diabetes and impaired renal function, screening candidates from natural products including Chinese herbal medicine (CHM) that have traditionally been used for symptoms associated with DKD, may offer insights into a more targeted approach for therapeutic development. With respect to CHM, records dating to the Han dynasty (AD 202–220) indicate the treatment of DKD symptoms in Chinese medicine literature and contemporary literature including RCTs indicating CHM is used for diabetes and its complications<sup>12</sup>. Multi-ingredient herbal

1  
2  
3 decoctions and manufactured products of *Abelmoschi Corolla* and *Cordyceps* have been  
4 recommended for patients with DKD in the practice guidelines of Chinese medicine<sup>13 14</sup>.  
5  
6 However, these guidelines were based on experts' consensus rather than outcomes of  
7  
8 systematically evaluated best available clinical evidence. Moreover, safety concerns exist  
9  
10 due to the potential for aristolochic-acid nephrotoxicity with some herbal products<sup>5 15</sup>.  
11  
12 Even though legislation and quality control have been reinforced in recent years, the  
13  
14 general lack of information regarding the safety profiles of herbal formulae due to their  
15  
16 multi-compound nature have limited their application<sup>5 16</sup>.  
17  
18 In recent years, there have been a growing number of clinical trials and systematic reviews  
19  
20 of CHM for DKD but not of placebo-controlled trials. We therefore undertook a systematic  
21  
22 review and meta-analysis of randomised, placebo-controlled trials to evaluate the efficacy  
23  
24 and safety of oral CHM as adjunctive treatment for DKD.  
25  
26  
27  
28  
29  
30  
31  
32  
33

## 34 **METHODS**

35  
36 This systematic review was conducted following the Cochrane Handbook of Systematic  
37  
38 Reviews of Interventions and reported in accord with the PRISMA guidelines<sup>17 18</sup>. The  
39  
40 protocol was registered in the PROSPERO database and can be accessed online (Registry  
41  
42 number: CRD42015029293).  
43  
44  
45

### 46 **Search Strategy**

47  
48 A comprehensive search was conducted in the following databases irrespective of  
49  
50 publication status or language: MEDLINE, EMBASE, Cumulative Index of Nursing and  
51  
52 Allied Health Literature (CINAHL), Cochrane Central Register of Controlled Trials  
53  
54  
55  
56  
57  
58  
59  
60

(CENTRAL), Allied and Complementary Medicine Database (AMED), China BioMedical Literature (CBM), China National Knowledge Infrastructure (CNKI), Chongqing VIP (CQVIP) and Wanfang. The former five databases were in English while the later four were in Chinese. Databases were searched from inception to May 2018. The U.S.A. National Institutes of Health register (ClinicalTrials.gov), the Australian New Zealand Clinical Trial Registry (ANZCTR), the Chinese Clinical Trial Registry (ChiCTR), and the European Union Clinical Trials Register (EU-CTR) were searched for completed but unpublished trials. Further, reference lists of related systematic reviews were reviewed for additional publications.

Search terms included “diabetic nephropathy”, “diabetic kidney disease”, “albuminuria”, “Traditional Chinese Medicine”, “randomised controlled trial” and their synonyms. All terms were mapped to controlled vocabulary (where applicable) in addition to being searched as keywords. The MEDLINE search strategy is provided in **Table S1**.

### **Eligibility criteria**

Eligible studies had to fulfill the following criteria: (1) randomised controlled trial design; (2) included primary diabetes adults with persistent albuminuria/proteinuria, which was defined as an albumin excretion rate (AER) more than 20 µg/min, an albumin-to-creatinine ratio (ACR) larger than 30 mg/g<sup>4 5</sup> or 24-hour proteinuria over 0.5 g/d (the overt DKD stage defined by Mogensen and used as in DKD diagnostic criteria in China)<sup>19 20</sup>; (3) oral Chinese herbal medicine as intervention, which could have been either single or multiple ingredients in any form (decoction, granules, capsules etc.); (4) CHM matched placebo was applied in the control group; (5) both intervention and control groups received the same conventional treatments of DKD, including comprehensive management of glycaemia,



1  
2  
3 blood pressure, serum lipid level, life-style and nutrition in accordance with Kidney  
4 Disease Outcomes Quality Initiative (KDOQI) clinical practice guidelines'  
5 recommendation <sup>4 5</sup>; and, (6) the study reported at least one of the primary outcomes.  
6  
7  
8  
9  
10 Studies including patients with albuminuria that was not caused by diabetes, patients who  
11 already had ESKD, or those receiving renal replacement therapy were excluded.  
12  
13

### 14 15 **Outcomes of Interest**

16  
17  
18 Primary outcomes of interest included albuminuria/proteinuria, kidney function, number  
19 of participants progressing to ESKD, all-cause mortality and adverse events, at the end of  
20 treatment or follow-up. Progression to ESKD was defined as initiation of renal replacement  
21 therapy or estimated GFR (eGFR) lower than 15 mL/min/1.73m<sup>2</sup>. Kidney function was  
22 reflected by the measurement of serum creatinine concentration (Scr) and glomerulus  
23 filtration rate (GFR). Likewise, quantitative measurement of albuminuria and proteinuria  
24 included urinary albumin excretion rate (AER), albumin-to-creatinine ratio (ACR), 24-  
25 hour urine protein excretion (UP) and protein-to-creatinine ratio (PCR).  
26  
27  
28  
29  
30  
31  
32  
33  
34  
35

36 Secondary outcomes included cardiovascular mortality, all-cause hospitalization, quality  
37 of life measured by validated scales, indicators of risk factor control (such as fasting blood  
38 glucose, glycated haemoglobin [HbA1c], blood pressure, total cholesterol, triglycerides,  
39 low-density lipoprotein cholesterol [LDL-C], and high-density lipoprotein cholesterol  
40 [HDL-C]). All outcomes were reported with specified units at the end of treatment or at  
41 the end of follow-up.  
42  
43  
44  
45  
46  
47  
48  
49

50 Safety outcomes included numbers and type of adverse events and serious adverse events  
51 during the study period.  
52  
53  
54  
55  
56  
57  
58  
59  
60

## Study Selection and Data Extraction

Titles and abstracts identified in searching were screened by one reviewer and then checked by another (La Z. and X.Q.) against the predefined criteria. After titles and abstracts screening, possibly relevant studies underwent full-text review by La Z. and cross checked by L.Y. to confirm their eligibility. Any disagreement was resolved by consensus and discussion with a third reviewer (J.S. or AL.Z.).

Two reviewers (La Z and L.Y.) independently extracted data from eligible studies into a pre-designed spreadsheet. A third reviewer (J.S.) cross checked the data. Study design characteristics, trial locations, demographic features (age, types of diabetes, baseline albuminuria, kidney function, etc.), intervention and control protocol (herbal ingredients, dosage, frequency, treatment duration, follow-up period, etc.), and outcome measures were recorded. Authors of studies with missing data were contacted by email or telephone to obtain additional data.

## Data Synthesis and Analysis

All studies satisfying the eligibility criteria were included for qualitative synthesis. For continuous variables, mean and standard deviation of each study were obtained and pooled as mean difference (MD) or standardized mean differences (SMD) with a 95% confidence interval (CI). SMD was used in the meta-analysis of albuminuria and proteinuria outcomes due to the different scales used in the included studies such as microgram per minute ( $\mu\text{g}/\text{min}$ ), milligram to gram ( $\text{mg}/\text{g}$ ) and milligram per day ( $\text{mg}/24$  hours). For dichotomous data, risk ratios (RR) were calculated with a 95% CI. Considering the diversity of interventions and potential heterogeneity among included studies, a random-effect model was applied in all meta-analyses. Review Manager Software (RevMan, version 5.3) was

1  
2  
3 used to perform the statistical analysis <sup>21</sup>.  
4

5 Pre-defined subgroup analysis included baseline DKD severity and CHM formulae.  
6

7 Heterogeneity between studies was detected by using the Cochrane Q statistic and I<sup>2</sup> test.  
8

9  
10 For outcomes with substantial heterogeneity (I<sup>2</sup> levels >50%), subgroup analyses were  
11

12 performed to explore potential sources, whereby results were stratified by factors, such as  
13

14 different measured approaches for the same outcome. Sensitivity analysis was performed  
15

16 by excluding studies with high/unclear risk of bias in the domain of random sequence  
17

18 generation. Publication bias was explored when 10 or more studies were included in one  
19

20 meta-analysis by visual inspection of funnel plots for asymmetry.  
21  
22

### 23 **Quality Assessment**

24  
25  
26  
27 The methodologic quality of each individual study was assessed by two reviewers (La Z.  
28

29 and L.Y.) in parallel according to the Cochrane Risk of Bias (ROB) tool <sup>22</sup>. For the domain  
30

31 of other sources of bias, baseline imbalance and conflicts of interest were evaluated. Each  
32

33 domain was judged as high, low or unclear risk of bias with justifications. The consistency  
34

35 was checked by a third reviewer (Lei Z.) and disagreements were resolved by discussion  
36

37 with methodologists (AL.Z. and X.G.).  
38  
39

40  
41 To evaluate the overall quality of evidence for primary outcomes, the Grading of  
42

43 Recommendations Assessment, Development and Evaluation (GRADE) approach was  
44

45 applied <sup>23</sup>. A panel group was formed to make the GRADE evaluation, which included  
46

47 methodologists, CM practitioners and conventional medicine physicians. The assessments  
48

49 of evidence started at 'high quality', and were downgraded when significant risk of bias,  
50

51 indirectness, inconsistency, imprecision of estimated effect or publication bias were  
52

53 detected.  
54  
55  
56

## Patient and Public Involvement

Patients or public were not directly involved in this systematic review.

## RESULTS

### Description of Studies

The comprehensive search retrieved over 50 thousand citations and 7,255 of them were examined in full-text (**Figure 1**). Eighty-five percent of the studies were excluded due to lack of a placebo control. As a result, 20 eligible studies with 23 publications involving 2,719 DKD participants were included<sup>24-46</sup>. For studies with multiple reports, the most recent publication or the one with primary outcomes was used, and complementary outcomes data from other reports were extracted and merged.

Characteristics of the included studies are summarised in **Table 1**. All 20 studies were conducted in China. Except for one study<sup>24</sup> written in English, all others were published in Chinese language between 2000 and 2017. Enrolled participants were all diabetic patients with persistent albuminuria or proteinuria but varied in terms of baseline kidney function. The mean of age was 55.1 years old (range 20 to 79 years). Three studies<sup>34 35 37</sup> used herbal compounds or a single herb as intervention while the remaining 17 studies used CHM formulae with multi-ingredients. The ingredients of CHM used in each study are provided in **Table 2**. The most common herbal ingredients used by ten or more studies was *Astragali Radix*, *Rehmanniae Radix* and *Rhei Radix et Rhizoma*. All studies applied CHM matched placebo, except for one<sup>32</sup> which made Captopril (comparator) identical in appearance to CHM (intervention). Treatment duration ranged from 4 weeks to 2 years

(median 3 months). There were no outcome data with respect to cardiovascular mortality and all-cause hospitalisation among the included studies.

### **Quality of Studies**

Generally, the quality of included studies was fair with low or unclear risk of bias, especially regarding blinding and outcome data completeness (**Figure 2**). Two studies were judged at high risk of bias with respect to blinding of patients and personnel because blinding may have been compromised by prescription of unequal numbers/amounts of medication between groups<sup>28 31</sup>. Twelve studies reported correct procedures for random sequence generation<sup>24 25 28-30 34-36 38 41 44</sup>, whereas eight studies did not provide adequate details. For the domain of allocation concealment, one study did not conceal the allocation to researchers thus was judged at high risk of bias<sup>41</sup>. Seven studies were considered at high risk of selection reporting bias (mainly incomplete reporting in secondary outcomes)<sup>25 26 29 31 33 38 44</sup>, whilst 13 studies were at unclear risk because protocols were not found. Other bias assessment included baseline balance and conflict of interest. Two studies included pharmaceutical industry employees as co-authors without statements regarding their roles in the study, thereby these two trials were judged as high risk for potential conflicts of interest<sup>34 35</sup>. Seven studies without baseline statistical test results or without information regarding sources of funding were judged to be at unclear risk<sup>26 28 31 36 37 39 40</sup>.

### **Effecacy of Chinese herbal medicine**

Considering the uses of RAS blockage may affect the primary outcomes, studies were categorised and separated into three groups according to trial application of RAS blockade (angiotensin converting enzyme inhibitors [ACEi] and/or angiotensin receptor blockers [ARB]) in each arm prior to meta-analysis. It should be noted that conventional concurrent

1  
2  
3 treatments of DKD recommended by guidelines were applied equally in both groups in all  
4 included studies, such that these conventional treatments are not separately mentioned  
5  
6 henceforth. The three groups were:  
7  
8

- 9
- 10 • CHM versus placebo <sup>25 30 34 35 37-40 45</sup>;
- 11
- 12 • CHM plus ACEi/ARB versus placebo plus ACEi/ARB <sup>24 33 36 41 44</sup>; and,
- 13
- 14 • CHM versus placebo plus ACEi/ARB <sup>26-29 31 32 44 46</sup>
- 15
- 16
- 17

### 18 ***Mortality and progression to ESKD***

19  
20 Though all-cause mortality was measured in a study <sup>31</sup> comparing CHM with matched  
21 placebo plus Irbesartan, no deaths were observed amongst the 315 participants during the  
22 two-year follow-up (**Table 3**). Within the same trial, the number of patients that progressed  
23 to ESKD was reported as part of a composite outcome, measuring the number of patients  
24 with microalbuminuria progressing to macroalbuminuria, doubling serum creatinine from  
25 baseline, or initiating dialysis. Compared with placebo plus Irbesartan, the risk of  
26 experiencing this composite outcome may be 66% lower in the Chinese herbal medicine  
27 (CHM) group over two-year period (RR: 0.34, 95%CI [0.15, 0.77],  $p=0.01$ ; low quality  
28 evidence).  
29  
30  
31  
32  
33  
34  
35  
36  
37  
38  
39  
40  
41

### 42 ***Albuminuria***

43  
44 Fourteen studies reported albuminuria at the end of treatment (**Figure 3a**). Based on meta-  
45 analysis of eight studies <sup>25 30 34 35 37 39 40 45</sup> involving 1,021 participants, use of CHM  
46 probably lowered albuminuria compared to placebo over 2 to 12 months intervention  
47 (SMD -0.92, 95% CI [-1.35, -0.51],  $I^2 = 87%$ ,  $p < 0.0001$ ; moderate quality evidence).  
48  
49 Subgroup analysis suggested different CHM formulae could be the sources of  
50  
51  
52  
53  
54  
55  
56  
57  
58  
59  
60

1  
2  
3 heterogeneity (**Table S2**). The estimate of effect with the least heterogeneity was observed  
4  
5 in the Qi Wei granule CHM subgroup<sup>30 45</sup> in which albuminuria was 70.06 mg/24h lower  
6  
7 compared to placebo after 3 months (95% CI [-88.84, -51.28],  $I^2 = 0\%$ ,  $p < 0.0001$ ).  
8  
9 Likewise, the Arctiin granule<sup>34 35</sup> reduced albuminuria more than placebo after 2 months  
10  
11 intervention (SMD -0.38, 95% CI [-0.56, -0.20],  $I^2 = 0\%$ ,  $p < 0.0001$ ).  
12  
13

14  
15 When used in combination with ACEi/ARB, slightly lower end of treatment albuminuria  
16  
17 level was still observed in the CHM rather than in the placebo group over a 3 to 6 month  
18  
19 interval (SMD -0.56, 95% CI [-1.04, -0.08],  $I^2 = 64\%$ ,  $p = 0.002$ ; moderate quality evidence)  
20  
21 <sup>24 36 41</sup>. Although lower albuminuria excretion was observed in the CHM group<sup>26 27 32</sup>, the  
22  
23 effect of CHM in decreasing albuminuria compared to ACEi/ARB was uncertain because  
24  
25 of the very low quality of evidence (**Table 3**).  
26  
27

### 28 29 ***Proteinuria***

30  
31  
32 Nine studies measured end of treatment 24-hour proteinuria (**Figure 3b**). The pooled  
33  
34 estimated effect showed CHM may reduce proteinuria compared to placebo after 2 to 3  
35  
36 months intervention, although heterogeneity was high (SMD -1.34, 95% CI [-2.18, -0.51],  
37  
38  $I^2 = 94\%$ ,  $p = 0.002$ ; low quality evidence)<sup>30 34 35 45</sup>. Subgroup analysis revealed that  
39  
40 different formulae and proteinuria scales may have been the source of heterogeneity (**Table**  
41  
42 **S2**). Pooled estimates of effect of Qi Wei granule<sup>30 45</sup> and Arctiin granule<sup>34 35</sup> both showed  
43  
44 that CHM may lead to greater reductions in proteinuria than placebo. Subgroup of  
45  
46 measurements unit of milligram per 24-hour showed the proteinuria was 324.42 mg/24h  
47  
48 lower (95% CI, [-485.15, -163.69];  $I^2 = 30\%$ ;  $p < 0.0001$ ) in the CHM group than the  
49  
50 placebo group<sup>34 35 45</sup>.  
51  
52  
53

54  
55 When used in combination with ACEi/ARB, meta-analysis of four studies with 489  
56  
57

1  
2  
3 participants<sup>24 36 44</sup> showed that CHM may make little or no difference to proteinuria  
4 compared to placebo after 3 to 6 months of interventions (SMD -0.15, 95% CI [-0.52,0.23],  
5  
6  $I^2 = 72%$ ,  $p = 0.44$ ; low quality evidence). Sources of heterogeneity were not identified  
7  
8 (Table S2). Likewise, low quality evidence suggested that CHM may make no differences  
9  
10 to end of treatment proteinuria compared to placebo plus ACEi/ARB after 1 to 3 months  
11  
12 intervention (Table 3)<sup>28 44</sup>.  
13  
14

### 15 16 17 *Serum Creatinine Level* 18

19  
20 Ten studies provided end of treatment data of serum creatinine (Scr) level (Figure 3c).  
21  
22 Pooled estimation of two small studies<sup>38 45</sup> showed that the additional CHM intervention  
23  
24 probably made little difference to Scr levels compared with placebo after 3 to 6 months  
25  
26 (MD 5.75  $\mu\text{mol/L}$ , 95% CI [-2.06, 13.57],  $I^2 = 0%$ ,  $p = 0.15$ ; moderate quality evidence).  
27  
28 When used in combination with ACEi/ARB, end of treatment Scr level was slightly lower  
29  
30 in the CHM group compared to the placebo group over 3 to 6 months, but was not clinically  
31  
32 significant (MD -4.02  $\mu\text{mol/L}$ , 95% CI [-7.81, -0.23],  $I^2 = 0%$ ,  $p = 0.15$ ; moderate quality  
33  
34 evidence)<sup>24 33 36 41 44</sup>. Subgroup analysis found that the lowering Scr effect of CHM was  
35  
36 evident in patients with abnormal baseline Scr after 3 months intervention (MD -9.99  
37  
38  $\mu\text{mol/L}$ , 95% CI [-17.71, -2.26],  $I^2 = 0%$ ,  $p = 0.01$ )<sup>36 44</sup>.  
39  
40

41  
42 Slightly lower Scr levels were observed in the CHM group compared to placebo plus  
43  
44 ACEi/ARB group after 1 to 3 months intervention, but the difference was not clinically  
45  
46 significant<sup>26-28 44</sup>. A similar effect was found in the subgroup analysis of Tang Shen Ning  
47  
48 formula compared to placebo plus ARB after 2 to 3 months treatment (MD -3.96  $\mu\text{mol/L}$ ,  
49  
50 95% CI [-6.13, -1.78],  $I^2 = 6%$ ,  $p = 0.0004$ )<sup>26 27</sup>.  
51  
52  
53  
54  
55  
56  
57  
58  
59  
60



### *Estimated Glomerular Filtration Rate*

Of the eight studies, the glomerular filtration rate (GFR) was estimated by either Cockcroft-Gault equation or other serum creatinine-based equations (**Figure 3d**). When used in combination with ACEi/ARB, the end of treatment eGFR was slightly higher in the CHM group compared to placebo group after 3 to 6 intervention (MD 6.28 mL/min, 95% CI [2.42, 10.14],  $I^2 = 0\%$ ,  $p = 0.001$ ; moderate quality evidence)<sup>24 36 41 44</sup>. Subgroup analysis of specific formula showed that the end of treatment eGFR was 5.22 mL/min higher (95% CI [0.69, 9.74],  $I^2 = 0\%$ ,  $p = 0.02$ ) in the Tang Shen Fang formula plus ACEi/ARB group than the placebo plus ACEi/ARB group<sup>24 44</sup>. It should be noted that Cockcroft-Gault equation may overestimate eGFR, leading to 10-20% higher value in pooled estimation of eGFR than the actual eGFR and these positive results should be interpreted cautiously.

One small study (44 participants) provided low quality of evidence that CHM made no difference to placebo in terms of eGFR after 3 months intervention (**Table 3**)<sup>45</sup>. When comparing CHM to placebo plus ACEi/ARB, meta-analysis results indicated that no significant difference in eGFR over 1 to 3 months treatment (low quality evidence; **Table 3**)<sup>26 27 29 44</sup>.

### *Secondary Outcomes*

Meta-analysis results of secondary outcomes are summarised in **Table S3**. When compared to placebo, the pooled estimated effects for both fasting blood glucose (FBG)<sup>25 27 32 36 38-41</sup> and HbA1c<sup>24 27 32 36 38 39 41 45</sup> did not show additional benefit of CHM in lowering blood glucose. Likewise, summarised effects from three studies showed no statistical differences between the CHM and placebo groups for systolic and diastolic blood pressure<sup>24 39 45</sup>. CHM resulted in lower levels of total cholesterol<sup>24 32 36-41</sup>, triglycerides<sup>24 32 36-41</sup> and LDL-C

1  
2  
3 24 36-41, although HDL-C levels 24 32 36-41 were not statistically significant compared to  
4  
5 placebo. However, the results were limited by substantial heterogeneity and the reason was  
6  
7 not found. Three studies 24 42 46 measured patients' quality of life by questionnaire at the  
8  
9 end of treatment but only two studies used the Diabetes QoL tool and provided usable data.  
10  
11 The pooled estimation suggested no statistically significant differences between the CHM  
12  
13 and the placebo group regarding quality of life 24 46.  
14  
15

### 16 17 **Safety Evaluation of CHM Therapy**

18  
19  
20 Data on adverse events was provided in 14 studies. Of these, 7 studies stated no adverse  
21  
22 events (AEs) were observed during study period 27 29 30 32 33 38 45. In total, 53 cases of adverse  
23  
24 events were reported in seven studies with 1,445 participants. Except for Li's study 31,  
25  
26 details of AEs in each group were reported. The most common AE of CHM was digestive  
27  
28 system disorders (18 cases), including abdominal pain, diarrhea or sloppy stools 34 35 41.  
29  
30 Both the CHM and control groups reported a modest number of cases of elevated liver  
31  
32 enzyme levels (11 cases), infection (2 cases) or anemia (3 cases) 24 28 44. In a three-arm  
33  
34 study 44, one case of hypertension in the CHM group, one case of hypotension in losartan  
35  
36 group and one case of hyperkalemia in CHM plus losartan group were reported. All  
37  
38 participants that experienced the AEs recovered after discontinuation of the tested  
39  
40 interventions. Three cases of serious AEs, including two cases of death and a case of acute  
41  
42 myocardial infarction (AMI), were reported in Li's trial 24. One participant in the CHM  
43  
44 group died due to subarachnoid hemorrhage while another participant died after AMI. The  
45  
46 researchers reported that these serious AEs were not related to the study agent.  
47  
48  
49  
50  
51

### 52 53 **Sensitivity and Subgroup Analysis**

54  
55  
56 Sensitivity analysis by excluding studies with substantial risk of bias regarding  
57

1  
2  
3 randomisation showed consistent results with the primary analysis, except for the  
4 comparison of CHM versus placebo plus ACEi/ARB in terms of Scr level (**Table S4**).  
5  
6 Subgroup analysis indicated that baseline kidney function, different CHM formulae and  
7  
8 outcome measurement scales could partially explain the variant treatment effect of primary  
9  
10 outcomes (**Table S2**). Publication bias was not evaluated due to the limited number of  
11  
12 studies included in each outcome.  
13  
14  
15  
16  
17  
18  
19

## 20 **DISCUSSION**

21  
22  
23 This review included 20 RCTs involving 2,719 participants and evaluated the effects and  
24  
25 safety of CHM in addition to conventional therapies for DKD. As an adjunctive therapy,  
26  
27 CHM may decrease proteinuria (either measured as urinary albumin or protein excretion)  
28  
29 in DKD patients compared with placebo, regardless of concomitant use of ACEi/ARB.  
30  
31 When CHM and ACEi/ARB were used simultaneously, eGFR improved compared to  
32  
33 ACEi/ARB alone but studies had measurement shortfalls that may have overestimated the  
34  
35 effect. CHM appeared to be well tolerated in DKD patients and no significant adverse  
36  
37 events causal to CHM interventions were reported. These results suggest potential short-  
38  
39 term renal benefit by adding CHM to conventional pharmacotherapies in DKD populations.  
40  
41 However, due to the short follow-up periods and small numbers of clinical events in terms  
42  
43 of mortality and progression to ESKD, the long-term benefit of CHM is yet to be  
44  
45 determined.  
46  
47  
48  
49  
50  
51

52  
53 This study demonstrated that CHM may be applied as an adjunctive treatment for DKD to  
54  
55 achieve better renal outcomes. From the clinical perspective, the short-term  
56  
57

1  
2  
3 albuminuria/proteinuria reduction effect of CHM identified in this review is moderate  
4  
5 when compared to placebo. In patients with chronic kidney disease, the early reduction in  
6  
7 albuminuria is associated with lower risk of ESKD or doubling Scr level, particularly in  
8  
9 those patients with baseline albuminuria greater than 30mg/g <sup>47</sup>. Therefore, for the  
10  
11 subgroup of DKD patients who are contraindicated for ACEi/ARB use, CHM may offer  
12  
13 some benefit. When used in combination with ACEi/ARB, the lowering albuminuria effect  
14  
15 of CHM is mild to moderate from a clinical perspective. Considering the failure of dual  
16  
17 RAS inhibitors therapy, CHM could be a potential option for those DKD patients who are  
18  
19 on ACEi/ARB to achieve greater albuminuria reduction in the short-term. The combination  
20  
21 of CHM and ACEi/ARB may also be beneficial in improving eGFR, especially for patients  
22  
23 experiencing acute drop of eGFR after early RAS inhibitors initiation.  
24  
25  
26  
27  
28  
29  
30

31 Findings from this review are in line with those of previous reviews focusing on single  
32  
33 herbs or particular formulae. Li et.al reviewed the clinical effect of preparations of  
34  
35 *Astragali Radix* in DKD patients, finding that *Astragali* injection lowered Scr, increased  
36  
37 eGFR and reduced proteinuria based on data from 21 RCTs and 4 non-randomised  
38  
39 controlled trials <sup>48</sup>. In published reviews of *Ginkgo Folium* extract and *Xue Zhi Kang*  
40  
41 capsules, lower fasting blood glucose and HbA1c levels in the CHM group were reported  
42  
43 <sup>49 50</sup>. The inconsistency in terms of the glycaemic outcomes may have been due to  
44  
45 differences in ingredients amongst the included studies. In our review, only two trials  
46  
47 applied either *Ginkgo Folium* extract or *Xue Zhi Kang* capsules as interventions. The  
48  
49 glycaemic control effect may have been diluted by other trials using various herbal  
50  
51 ingredients, which targeted on kidney rather than glycaemic control. It should also be noted  
52  
53  
54  
55  
56  
57  
58  
59  
60

1  
2  
3 that the studies included in the previous reviews of *Ginkgo Folium* extract and *Xue Zhi*  
4 *Kang* capsules resulted in significant risk of bias (including publication bias). Thus,  
5  
6 rigorous and large scale clinical trials are needed to confirm the glycemetic control effects  
7  
8 of CHM in DKD patients.  
9  
10

11  
12  
13  
14 The renal protective effect of CHM may be related to particular bioactive compounds  
15 contained in the herbal ingredients included in these RCTs. The most frequently used herb  
16 was *Astragali Radix*. Both *in vitro* and *in vivo* studies have indicated that chemical  
17 components of *Astragali Radix*, such as Astragaloside IV and Astragalus saponin I, exert  
18 anti-oxidant and anti-inflammatory properties in diabetic models<sup>51 52</sup>. These chemicals can  
19 prevent and restore kidney tissue injury related to oxidative stress. Additionally,  
20 Astragaloside IV can reduce endoplasmic reticulum stress and increase podocyte integrity,  
21 which is the therapeutic target for decreasing albuminuria<sup>53 54</sup>. The second most frequently  
22 used herb, *Rehmanniae Radix*, also upregulates anti-inflammatory and antioxidant effects  
23 in diabetic rats<sup>55</sup>. Furthermore, anti-diabetic properties were observed in its constituent  
24 compound (catalpol) and ethanolic extract<sup>56</sup>. Although the glucose lowering effect of  
25 *Rehmanniae Radix* was not superior to metformin, its use was associated with higher anti-  
26 inflammatory activity, lower oxidative stress levels, and restoration of diabetes-induced  
27 kidney lesions. The third most frequent herb was *Rhei Radix et Rhizoma*. Active  
28 compounds of *Rhei Radix et Rhizoma*, including anthraquinones (rhein and emodin) and  
29 phenolic acids (gallic acid and ferulic acid), have been shown to protect the kidneys by  
30 reducing oxidative stress, inflammation, fibronectin and extracellular matrix accumulation  
31  
32  
33  
34  
35  
36  
37  
38  
39  
40  
41  
42  
43  
44  
45  
46  
47  
48  
49  
50  
51  
52  
53  
54  
55  
56  
57  
58  
59  
60

1  
2  
3 *Rhizoma* can inhibit lipid peroxidation and lower serum lipid levels, which are risk factors  
4  
5 for diabetes and DKD progression<sup>60 61</sup>.  
6  
7

8  
9  
10 Renal toxicity induced by aristolochic acid (AA) has been a concern since a series of renal  
11  
12 failure cases caused by AA contaminated products were reported<sup>62 63</sup>. In our review, the  
13  
14 CHM used in included studies appeared to be well-tolerated and safety signals were not  
15  
16 identified. This could be related to the fact that all herbal ingredients investigated were free  
17  
18 from AA, and some of the studies mentioned a strict quality control processes regarding  
19  
20 the CHM raw material and manufacturing procedures<sup>24 31 44</sup>. Mortality risk reduction effect  
21  
22 of non-AA prescribed CHM was indicated in a chronic kidney disease population study,  
23  
24 but for DKD patients, the long-term safety of CHM requires further studies to confirm<sup>64</sup>.  
25  
26  
27

28  
29  
30 Although this review was conducted in a systematic and comprehensive manner, there are  
31  
32 limitations that should be taken into account when interpreting the findings. Firstly, the  
33  
34 number of included studies was relatively small, and few studies measured and reported  
35  
36 the same outcomes consistently. This caused difficulty in meta-analysis and introduced  
37  
38 heterogeneity across studies and led to downgrading in quality of evidence. Even meta-  
39  
40 analyses with low heterogeneity may not be reliable because there were only a very small  
41  
42 number of included studies in the subgroup analyses (less than or equal to three studies in  
43  
44 each subgroup). In addition, the positive effect of CHM in eGFR outcomes is dominated  
45  
46 by a study using Cockcroft-Gault equation (64.8% weight), leading to possible  
47  
48 overestimation of eGFR value<sup>65</sup>. Core outcome sets with standardised measurements are  
49  
50  
51  
52  
53  
54  
55  
56  
57  
58  
59  
60 needed in future studies to rigorously assess the effect of CHM. Secondly, most of the

1  
2  
3 studies had short follow-up periods (1-3 months) and small sample sizes, leading to  
4  
5 imprecision of the estimated effect and low certainty with regard to long-term benefit and  
6  
7 effect on renal function and clinical outcomes. Thirdly, more than half of the included  
8  
9 studies did not provide information on randomisation and allocation procedures, such that  
10  
11 the impact of potential selection bias was unclear. Although the CHM formulae were  
12  
13 processed as granules or capsules in order to achieve blinding, quality assurance  
14  
15 information for each CHM preparation was not provided in most of the studies. Further  
16  
17 studies are strongly encouraged to report following the CONSORT reporting guidelines  
18  
19 with sufficient details regarding the manufacture and quality control of investigated CHM  
20  
21 <sup>66-68</sup>. Finally, although we did not limit the CHM interventions in terms of herbal  
22  
23 composition, five included studies shared highly homologous CHM ingredients synthesis  
24  
25 <sup>24 30 31 44 45</sup>, thereby limiting the diversity of CHM treatments evaluated.  
26  
27  
28  
29  
30  
31  
32

33 Since the participants in most included trials were older adults with a GFR greater than 60  
34  
35 mL/min, the renal protective effect of CHM in younger individuals and in advanced kidney  
36  
37 disease is uncertain. Moreover, all included studies were conducted in China, such that the  
38  
39 effect of CHM reported in this review may not be generalisable to other population groups.  
40  
41 It should further be noted that, in most of the included studies, the forms of CHM used  
42  
43 were multi-ingredients herbal formulae, which were developed based on traditional  
44  
45 Chinese medicine theory and experts' clinical experience. While indicative from  
46  
47 pharmacological studies, the most frequently used ingredients and formulae discussed  
48  
49 above may not necessarily be relevant to the observed effects reported in this study.  
50  
51  
52  
53  
54  
55  
56  
57  
58  
59  
60

## CONCLUSION

In conclusion, combination of CHM with conventional RAS inhibitors showed promise as an adjunctive treatment for improving renal function and decreasing urinary albumin and protein excretion in patients with DKD. The rate of occurrences of adverse events was low and the tested CHM appeared to be well-tolerated. This systematic review also provided potential candidate formulae and frequently used herbs for further investigation. Well-designed RCTs following reporting guidelines with adequate sample sizes and longer follow-up periods are warranted to confirm the long-term efficacy and safety of CHM, especially with respect to patient-oriented outcomes such as mortality, disease progression, and quality of life.



### **Acknowledgements**

La Zhang is supported by a Chinese Medicine Collaborative Research Training Scholarship from the China-Australia International Research Centre for Chinese Medicine (CAIRCCM). David Johnson is supported by an Australian National Health and Medical Research Council Practitioner Fellowship.

### **Funding Statement**

The project is jointly supported by the China-Australia International Research Centre for Chinese Medicine (CAIRCCM) - a joint initiative of RMIT University, Australia and the Guangdong Provincial Academy of Chinese Medical Sciences, China with additional funding support from the Ministry of Science & Technology of China (International Cooperation Project, Grant Number 2012DFA31760), and a grant from the National Natural Science Foundation of China (Grant Number 81603717).

### **Competing Interests**

None declared.

### **Data Sharing Statement**

Data extracted from original studies and data used for meta-analysis are available upon request.

### **Contributions**

Research idea and study design: La Z, CL, CCX, WM; data collection and screening: La Z, LY, JS, XQ, ALZ; data extraction: La Z, LY, JS; data analysis: La Z, JS; Risk of bias assessment: La Z, LY, Lei Z, XG, ALZ; GRADE assessment: WM, Lei Z, LY, JS, and DJ; Manuscript writing: all authors; supervision and mentorship: CCX, XL, CL. Each author contributed important intellectual content during manuscript drafting and revision and

1  
2  
3 accepts accountability for the overall work by ensuring that questions pertaining to the  
4 accuracy or integrity of any portion of the work are appropriately investigated and resolved.  
5  
6  
7  
8  
9

### 10 **Supplementary Material**

11  
12 Table S1: Search strategy of MEDLINE.

13  
14 Table S2: Subgroup Analysis of primary outcomes

15  
16 Table S3: Meta-analysis results of secondary outcome

17  
18 Table S4: Sensitivity Analysis of primary outcomes  
19  
20  
21  
22  
23  
24  
25  
26  
27  
28  
29  
30  
31  
32  
33  
34  
35  
36  
37  
38  
39  
40  
41  
42  
43  
44  
45  
46  
47  
48  
49  
50  
51  
52  
53  
54  
55  
56  
57  
58  
59  
60

## References

1. White SL, Chadban S. KinD Report (Kidneys in Diabetes): temporal trends in the epidemiology of diabetic kidney disease and the associated health care burden in Australia. *Report of the Kidney in Diabetes*. Melbourne, Australia: Kidney Health Australia, 2014.
2. Saran R, Li Y, Robinson B, et al. US renal data system 2014 annual data report: epidemiology of kidney disease in the United States. *Am J Kidney Dis*. 2015;66(1) (suppl 1):S1-305.
3. Sarnak MJ, Levey AS, Schoolwerth AC, et al. Kidney disease as a risk factor for development of cardiovascular disease: a statement from the American Heart Association Councils on Kidney in Cardiovascular Disease, High Blood Pressure Research, Clinical Cardiology, and Epidemiology and Prevention. *Circulation*. 2003;108(17):2154-2169.
4. Kidney Disease Outcomes Quality Initiative. Clinical practice guidelines and clinical practice recommendations for diabetes and chronic kidney disease. *Am J Kidney Dis*. 2007;49(2) (suppl 2):S12-154.
5. National Kidney Foundation. KDOQI clinical practice guideline for diabetes and CKD: 2012 update. *Am J Kidney Dis*. 2012;60(5):850-886.
6. Kramer H, Boucher RE, Leehey D, et al. Increasing mortality in adults with diabetes and low estimated glomerular filtration rate in the absence of albuminuria. *Diabetes Care*. 2018;41:775-781.
7. Krolewski AS, Skupien J, Rossing P, Warram JH. Fast renal decline to end-stage renal disease: an unrecognized feature of nephropathy in diabetes. *Kidney Int* 2017;91(6):1300-1311.
8. Afkarian M, Zelnick LR, Hall YN, et al. Clinical Manifestations of Kidney Disease Among US Adults With Diabetes, 1988-2014. *JAMA*. 2016;316(6):602-610.
9. Muskiet MHA, Wheeler DC, Heerspink HJL. New pharmacological strategies for protecting kidney function in type 2 diabetes. *The Lancet Diabetes & Endocrinology*. 2018; doi: [https://doi.org/10.1016/S2213-8587\(18\)30263-8](https://doi.org/10.1016/S2213-8587(18)30263-8).
10. de Zeeuw D, Akizawa T, Audhya P, et al. Bardoxolone methyl in type 2 diabetes and stage 4 chronic kidney disease. *N Engl J Med*. 2013;369(26):2492-2503.
11. Packham DK, Wolfe R, Reutens AT, et al. Sulodexide fails to demonstrate renoprotection in overt type 2 diabetic nephropathy. *J Am Soc Nephrol*. 2012;23(1):123-130.
12. Zhang L, Li Y, Guo XF, et al. Text mining of the classical medical literature for medicines that show potential in diabetic nephropathy. *Evid Based Complement Alternat Med*. 2014;2014:189125.
13. China Academy of Chinese Medical Sciences. Evidence-based guidelines of clinical practice in Chinese medicine-internal medicine. *Beijing: China Press of Traditional Chinese Medicine*; 2011. (in Chinese) 中国中医科学院. 中医循证临床实践指南: 中医内科分册. 北京: 中国中医药出版社, 2011
14. Gao YB, Liu TH, Nan Z, Zhen Z, Zhou Q. The Chinese medicine diagnosis and treatment standards of diabetic nephropathy. *World Journal of Integrated Traditional and Western Medicine*. 2011;6(6):548-552. (in Chinese) 高彦彬, 刘铜华, 南征, et al. 糖尿病肾脏疾病中医诊疗标准. *世界中西医结合杂志* 2011;6(6):548-52
15. Lord GM, Cook T, Arlt VM, Schmeiser HH, Williams G, Puesy CD. Urothelial

- malignant disease and Chinese herbal nephropathy. *Lancet*. 2001;358(9292):1515-1516.
16. Stanifer JW, Kilonzo K, Wang D, et al. Traditional medicines and kidney disease in low- and middle-income countries: opportunities and challenges. *Semin Nephrol*. 2017;37(3):245-259.
  17. Higgins JPT, Green S. Cochrane handbook for systematic reviews of interventions (Version 5.1.0). The Cochrane Collaboration, 2011.
  18. Moher D, Liberati A, Tetzlaff J, et al. Preferred reporting items for systematic reviews and meta-analyses: the PRISMA statement. *Ann Intern Med*. 2009;151(4):264-269.
  19. Mogensen CE, Christensen CK, Vittinghus E. The stages in diabetic renal-disease - with emphasis on the stage of incipient diabetic nephropathy. *Diabetes*. 1983;32:64-78.
  20. Yang NZ, Liu XS. Diagnosis, syndrome differentiation and treatment effect evaluation of diabetic nephropathy (protocol). *Shanghai Journal of Traditional Chinese Medicine*. 2007;41(7):7-8. 杨霓芝, 刘旭生. 糖尿病肾病诊断, 辨证分型及疗效评定标准 (试行方案). *上海中医药杂志* 2007;41(7):7-8.
  21. The Nordic Cochrane Centre, The Cochrane Collaboration. *Review Manager (RevMan)*. Copenhagen, Denmark: The Nordic Cochrane Centre, The Cochrane Collaboration; 2014
  22. Higgins JPT, Altman DG, Gøtzsche PC, et al. The Cochrane Collaboration's tool for assessing risk of bias in randomised trials. *BMJ*. 2011;343:d5928.
  23. Schünemann H, Brozek J, Guyatt G. GRADE handbook for grading quality of evidence and strength of recommendation. <https://gdt.grade.pro.org/app/handbook/handbook.html>. Accessed October 19, 2017.
  24. Li P, Chen YP, Liu JP, et al. Efficacy and safety of tangshen formula on patients with type 2 diabetic kidney disease: a multicenter double-blinded randomized placebo-controlled trial. *Plos One*. 2015;10(5): e012602710.
  25. Fan YW. Clinical study of Qi Kwai granules in early type 2 diabetic nephropathy. *Naijing: Nanjing University of Chinese Medicine*; 2010. (in Chinese) 范译文. 芪葵颗粒干预早期 2 型糖尿病肾病的临床研究. 南京中医药大学, M1 - 硕士, 2010.
  26. Gao YB, Zhao HL, Guan S, et al. Clinical research of Tang Shen Ning in treating early stage of diabetic nephropathy with types of deficiency of both vital energy and yin and collaterals siltation and stagnant. *China Journal of Traditional Chinese Medicine and Pharmacy*. 2006(07):409-411. 高彦彬, 赵慧玲, 关崧, et al. 糖肾宁治疗气阴两虚、络脉瘀滞型早期糖尿病肾病临床研究. *中华中医药杂志* 2006(07):409-411.
  27. Gao YB, Zhou HL, Guan S, et al. Multicenter randomized and double-blind controlled clinical trial of Tang Shen Ning Granules in treating diabetic kidney disease. *Chinese Journal of Traditional Chinese Medicine*. 2017;32(11):5212-5215. (in Chinese) 高彦彬, 周晖, 关崧, et al. 糖肾宁颗粒治疗糖尿病肾病多中心随机双盲对照临床试验. *中华中医药杂志* 2017;32(11):5212-5215.
  28. Han YL, Liu HF, Lou XE, Miao GZ, Wang XQ. Method of combination of disease and syndrome in treating stage IV proteinuria in diabetic nephropathy of Qi-Yin deficiency. *Journal of Changchun University of Traditional Chinese Medicine*. 2014;30(5):903-905. (in Chinese) 韩玉岭, 柳红芳, 娄锡恩, et al. 病

- 证结合治疗气阴两虚型糖尿病肾病IV期蛋白尿. *长春中医药大学学报* 2014(05):903-905.
29. Jia M, Zhao JX, Dong C, Feng R. Clinical research of Sanhuang Yishen granule on patients diabetic nephropathy in IV stage. *World Chinese Medicine*. 2015;10(6):845-848. (in Chinese) 贾冕, 赵进喜, 董超, et al. 三黄益肾颗粒干预糖尿病肾病IV期的临床研究. *世界中医药* 2015(06):845-848.
30. Jia XL. Study on clinic effect and experiment research of Qiwei treating the DN. *Beijing: Beijing University of Chinese Medicine*; 2012. (in Chinese) 贾晓蕾. 芪卫颗粒干预糖尿病肾病临床及实验研究. 北京中医药大学, M1 - 硕士, 2012.
31. Li J, Zhao JX, Wang SD, et al. Effect of the whole course intervention program of combined therapy of TCM on the endpoint events of diabetic nephropathy. *Journal of Traditional Chinese Medicine*. 2012;53(7):568-571+580. (in Chinese) 李景, 赵进喜, 王世东, et al. 中医药综合治疗方案全程干预对糖尿病肾病终点事件的影响. *中医杂志* 2012(07):568-71+80.
32. Lin L, Ni Q, Gao QJ et al. Clinical study on Tangweikang capsule in treating diabetic nephropathy. *Chinese Journal of Integrated Traditional and Western Medicine*. 2000;20(11):811-814. (in Chinese) 林兰, 倪青, 高齐健, et al. 糖微康胶囊治疗糖尿病肾病的临床观察. *中国中西医结合杂志* 2000(11):811-814.
33. Liu YF. Qihuang capsule in treatment of diabetic nephropathy Qi and Yin deficiency syndrome clinical. *Harbin: Heilongjiang University Of Chinese Medicine*; 2015. (in Chinese) 刘羽飞. 芪黄胶囊治疗糖尿病肾病气阴两虚型的临床观察. 黑龙江中医药大学, M1 - 硕士, 2015.
34. Ma ST, Liu DL, Niu R, et al. Double -blind randomized placebo-controlled multicentre phase III clinical trial of Arctiin granule in the treatment of diabetic nephropathy. *Chin J Clin Pharmacol*. 2011;27(1):15-18. (in Chinese) 马松涛, 刘冬恋, 牛锐, et al. 牛蒡子苷治疗糖尿病肾病的随机双盲安慰剂多中心III期临床试验. *中国临床药理学杂志* 2011(01):15-18.
35. Ma ST, Liu DL, Niu R, et al. Tangjiangshekang granule in treatment of diabetic nephropathy: a double -blind, randomized, placebo-controlled multicentre clinical trial. *Chin J New Drugs Clin Rem*. 2011;30(1):16-19. (in Chinese) 马松涛, 刘冬恋, 牛锐, et al. 糖降肾康颗粒治疗糖尿病肾病随机双盲安慰剂对照多中心临床试验. *中国新药与临床杂志* 2011(01):16-19.
36. Ni Q, Jiang S, Xiao YX, et al. A clinical observation on Qiyao Xiaoke capsule combined with western medicine for 146 cases of Diabetic Nephropathy. *Journal of Traditional Chinese Medicine*. 2013;54(6):484-487. (in Chinese) 倪青, 姜山, 肖月星, et al. 芪药消渴胶囊联合西药治疗糖尿病肾病 146 例临床观察. *中医杂志* 2013(06):484-487.
37. Wei N, Chang WS, Xue DZ, Shen XF. Effect of Xuezhikang on oxidative stress in early diabetic nephropathy. *Chinese General Practice*. 2012;15(18):2085-2087. (in Chinese) 魏娜, 常万松, 薛迪中, et al. 血脂康对早期糖尿病肾病患者氧化应激的影响. *中国全科医学* 2012(18):2085-2087.
38. Wei X, Yao HJ, Liu Y, Zhang J. Efficacy observation of adjunctive treatment of gandi capsules for diabetic nephropathy. *China Pharmacy*. 2016;27(2):225-227. (in Chinese) 魏昕, 姚慧娟, 刘艳, et al. 甘地胶囊辅助治疗糖尿病肾病的疗效观察. *中国药房* 2016(02):225-227.

- 1  
2  
3  
4  
5  
6  
7  
8  
9  
10  
11  
12  
13  
14  
15  
16  
17  
18  
19  
20  
21  
22  
23  
24  
25  
26  
27  
28  
29  
30  
31  
32  
33  
34  
35  
36  
37  
38  
39  
40  
41  
42  
43  
44  
45  
46  
47  
48  
49  
50  
51  
52  
53  
54  
55  
56  
57  
58  
59  
60
39. Xie SF, Huang LJ, Liu JS, Yu JY, Wang XC. The long-term effect of Yang yin he luo medicinals for reducing urinary albumin to creatinine ratio in early diabetic nephropathy patients. *Jiangsu J Tradit Chin Med*. 2011;43(9):19-20. (in Chinese) 谢绍锋, 黄莉吉, 刘敬顺, et al. 长期应用养阴和络中药对早期糖尿病肾病患者尿微量白蛋白肌酐比值的影响. *江苏中医药* 2011(09):19-20.
  40. Yang L, Tan ZH, Li YK. The clinical effect observation of Qiming granules with standard care for early diabetic nephropathy. *Guiding Journal of Traditional Chinese Medicine and Pharmacy*. 2014;20(6):52-53. (in Chinese) 杨力, 檀增桓, 李玉坤, et al. 芪明颗粒配合常规疗法治疗早期糖尿病肾病 71 例临床观察. *中医药导报* 2014(06):52-53.
  41. Yang M. Study on the clinical exploratory study of Qizhu granule in the treatment of early type 2 diabetic nephropathy. *Beijing: China Academy of Chinese Medical Sciences*; 2017. (in Chinese) 杨明. 芪术颗粒治疗早期 2 型糖尿病肾病临床探索性试验研究 [硕士]. 中国中医科学院, 2017.
  42. Zhang LF, Lv RH, Zhao JX, Wang SR. Effect of TCM treatment on quality of life in diabetic nephropathy patients with renal failure: a multi-centered clinical study. *Journal of Traditional Chinese Medicine*. 2008;49(2):119-122. (in Chinese) 张丽芬, 吕仁和, 赵进喜, et al. 中医辨证治疗方案对糖尿病肾病肾功能不全患者生存质量的影响——多中心临床研究. *中医杂志* 2008(02):119-122.
  43. Zhang LF, Zhao JX, Lv RH, et al. The effect of Differentiation Chinese Medicine Treatment on Syndrome Improvement in diabetic nephropathy patients with renal failure. Abstract of the forth International Integration Medicine Conference of Kidney Diseases. Tian jin, China; 2006. (in Chinese) 中医辨证论治糖尿病肾病肾功能不全证候疗效评价研究. 第四届国际中西医结合肾脏病学术会议; 2006; 中国天津.
  44. Zhang LF, Zhao JX, Lv RH, et al. Study on the effectiveness and safety of optimum program of prevention and treatment of renal insufficiency of diabetic nephropathy. *China Foreign Medical Treatment*. 2006;47(10):755-758. (in Chinese) 张丽芬, 赵进喜, 吕仁和, et al. 糖尿病肾病肾功能不全防治优化方案的有效性和安全性研究. *中医杂志* 2006(10):755-758.
  45. Zhou JX. Effect and safety of Qiwei granule on diabetic nephropathy and podocyte. *Beijing: Beijing University of Chinese medicine*; 2014. (in Chinese) 周静鑫. 芪卫颗粒干预糖尿病肾病临床疗效及其保护足细胞作用机制研究. 北京中医药大学, M1 - 博士, 2014.
  46. Zhou X, Zhao JX, Wang SD, et al. Effect of TCM Comprehensive Treatment Program on Quality of Life in Patients With Diabetic Nephropathy. *Journal of Traditional Chinese Medicine*. 2014;55(6):473-477. (in Chinese) 周鑫, 赵进喜, 王世东, et al. 中医药综合治疗方案对糖尿病肾病患者生存质量的影响. *中医杂志* 2014(06):473-477.
  47. Heerspink HJL, Greene T, Tighiouart H, et al. Change in albuminuria as a surrogate endpoint for progression of kidney disease: a meta-analysis of treatment effects in randomised clinical trials. *The Lancet Diabetes & Endocrinology*. 2019;7(2):128-139.
  48. Li MX, Wang WX, Xue J, Gu Y, Lin SY. Meta-analysis of the clinical value of Astragalus membranaceus in diabetic nephropathy. *J Ethnopharmacol*

- 2011;133(2):412-419.
49. Wang F, Wu HM. Xuezhikang for diabetic kidney disease: a systematic review of randomized controlled trials. *Chin J Evid-based Med*. 2009;9(1):63-70. (in Chinese) 王锋, 吴红梅. 血脂康治疗糖尿病肾病的系统评价, 2009.
  50. Zhang L, Mao W, Guo XF, et al. Ginkgo biloba extract for patients with early diabetic nephropathy: a systematic review. *Evid Based Complement Alternat Med* 2013;2013:689142.
  51. Gui D, Huang JH, Guo YP, et al. Astragaloside IV ameliorates renal injury in streptozotocin-induced diabetic rats through inhibiting NF- $\kappa$ B-mediated inflammatory genes expression. *Cytokine*. 2013;61(3):970-977.
  52. Qi WW, Niu JY, Qin QJ, Qiao ZD, Gu Y. Astragaloside IV attenuates glycated albumin-induced epithelial-to-mesenchymal transition by inhibiting oxidative stress in renal proximal tubular cells. *Cell Stress Chaperones*. 2014;19(1):105-114.
  53. Gui D, Guo Y, Wang F, et al. Astragaloside IV, a novel antioxidant, prevents glucose-induced podocyte apoptosis in vitro and in vivo. *PLoS one*. 2012;7(6):e39824.
  54. Wang ZS, Xiong F, Xie XH, Chen D, Pan JH, Cheng L. Astragaloside IV attenuates proteinuria in streptozotocin-induced diabetic nephropathy via the inhibition of endoplasmic reticulum stress. *BMC nephrol*. 2015;16(1):44.
  55. Waisundara VY, Huang M, Hsu A, Huang D, Tan BK. Characterization of the anti-diabetic and antioxidant effects of rehmanna glutinosa in streptozotocin-induced diabetic Wistar rats. *Am J Chin Med*. 2008;36(6):1083-1104.
  56. Yang SS, Deng HC, Zhang QZ, et al. Amelioration of diabetic mouse nephropathy by catalpol correlates with down-regulation of Grb10 expression and activation of insulin-like growth factor 1/insulin-like growth factor 1 receptor signaling. *PLoS One*. 2016;11(3):e0151857.
  57. Zhang ZH, Wei F, Vaziri ND, et al. Metabolomics insights into chronic kidney disease and modulatory effect of rhubarb against tubulointerstitial fibrosis. *Sci Rep*. 2015;5:14472.
  58. Ahad A, Ahsan H, Mujeeb M, Siddiqui WA. Gallic acid ameliorates renal functions by inhibiting the activation of p38 MAPK in experimentally induced type 2 diabetic rats and cultured rat proximal tubular epithelial cells. *Chem Biol Interact*. 2015;240:292-303.
  59. Zeng CC, Liu X, Chen GR, et al. The molecular mechanism of rhein in diabetic nephropathy. *Evid Based Complement Alternat Med*. 2014;2014:487097.
  60. Hosseini A, Mollazadeh H, Amiri MS, Sadeghnia HR, Ghorbani A. Effects of a standardized extract of Rheum turkestanicum Janischew root on diabetic changes in the kidney, liver and heart of streptozotocin-induced diabetic rats. *Biomed Pharmacother* 2017;86:605-11.
  61. Punithavathi VR, Prince PS, Kumar R, Selvakumari J. Antihyperglycaemic, antilipid peroxidative and antioxidant effects of gallic acid on streptozotocin induced diabetic Wistar rats. *Eur J Pharmacol* 2011;650(1):465-471.
  62. Vanherweghem JL, Depierreux M, Tielemans C, et al. Rapidly progressive interstitial renal fibrosis in young women: association with slimming regimen including Chinese herbs. *Lancet*. 1993;341(8842):387-391.
  63. Nortier JL, Martinez MCM, Schmeiser HH, et al. Urothelial carcinoma associated with the use of a Chinese herb (*Aristolochia fangchi*). *New Engl J Med*. 2000;342(23):1686-1692.

- 1  
2  
3  
4  
5  
6  
7  
8  
9  
10  
11  
12  
13  
14  
15  
16  
17  
18  
19  
20  
21  
22  
23  
24  
25  
26  
27  
28  
29  
30  
31  
32  
33  
34  
35  
36  
37  
38  
39  
40  
41  
42  
43  
44  
45  
46  
47  
48  
49  
50  
51  
52  
53  
54  
55  
56  
57  
58  
59  
60
64. Hsieh CF, Huang SL, Chen CL, Chen WT, Chang HC, Yang CC. Non-aristolochic acid prescribed Chinese herbal medicines and the risk of mortality in patients with chronic kidney disease: results from a population-based follow-up study. *Bmj Open*. 2014;4(2):e004033.
  65. Levey AS, Stevens LA. Estimating GFR using the CKD Epidemiology Collaboration (CKD-EPI) creatinine equation: more accurate GFR estimates, lower CKD prevalence estimates, and better risk predictions. *Am J Kidney Dis*. 2010;55(4):622-627.
  66. Gagnier JJ, Boon H, Rochon P, et al. Improving the quality of reporting of randomized controlled trials evaluating herbal interventions: implementing the CONSORT statement. *Explore(NY)*. 2006;2(2):143-149.
  67. Gagnier JJ, Boon H, Rochon P, et al. Reporting randomized, controlled trials of herbal interventions: an elaborated CONSORT statement. *Ann Intern Med*. 2006;144(5):364-367.
  68. Schulz KF, Altman DG, Moher D, et al. CONSORT 2010 Statement: updated guidelines for reporting parallel group randomised trials. *BMJ*. 2010;340:c332.



Table 1 Characteristic of Included Studies

| Study                    | Sample Size (M/F) | Age  | Diabetes Type | Inclusion criteria of kidney function                                   | Intervention and Control Protocol                                                                                                   | Duration | Reported Outcomes                           |
|--------------------------|-------------------|------|---------------|-------------------------------------------------------------------------|-------------------------------------------------------------------------------------------------------------------------------------|----------|---------------------------------------------|
| Fan, 2010 <sup>25</sup>  | 61 (28/33)        | 59.6 | 2             | Albuminuria 30-300 mg/g or 30-300 mg/24h                                | T: Qi Kui granule 1 bag bid<br>C: placebo                                                                                           | 12m      | UAE; FBG                                    |
| Jia, 2012 <sup>30</sup>  | 60 (29/31)        | 58.3 | 2             | Proteinuria < 3.5 g/24h;<br>Normal Scr level                            | T: Qi Wei granule 4.5g tid<br>C: placebo                                                                                            | 3m       | UAE; 24hUP;                                 |
| Ma, 2011a <sup>34</sup>  | 414 (186/228)     | 56.6 | NS            | Proteinuria ≤ 4.5 g/24h;<br>Scr ≤ 190 μmol/L                            | T: Arctiin granule 1 bag tid<br>C: placebo                                                                                          | 2m       | UAE; 24hUP;                                 |
| Ma, 2011b <sup>35</sup>  | 186 (78/108)      | 55.3 | NS            | Proteinuria ≤ 3.5 g/24h;<br>Scr < 176 μmol/L                            | T1: Arctiin granule 2 bag bid +<br>placebo 2 bag qd<br>T2: Arctiin granule 1 bag tid +<br>placebo 1 bag tid<br>C: placebo 2 bag tid | 2m       | UAE; 24hUP;                                 |
| Wei, 2012 <sup>37</sup>  | 56 (24/32)        | 50.6 | NS            | Albuminuria 30-300 mg/24h;<br>Scr ≤ 105 μmol/L                          | T: Xue Zhi Kang capsule 0.6g tid<br>C: placebo                                                                                      | 3m       | UAE; TC; TG; LDLC; HDLC                     |
| Wei, 2016 <sup>38</sup>  | 41 (32/9)         | 61.8 | 2             | Albuminuria > 30 mg/g<br>and Proteinuria ≤ 3.5 g/24h<br>GFR ≥ 30 mL/min | T: Gan Di capsule 3# tid<br>C: placebo                                                                                              | 6m       | Scr; FBG; A1C; TC; TG; LDLC; HDLC           |
| Xie, 2011 <sup>39</sup>  | 67 (30/37)        | 62.3 | 2             | Albuminuria 30-299 μg/mg                                                | T: Liu Wei Di Huang pill 3g tid +<br>Ginkgo biloba tablet 19.2mg tid<br>C: LWDHW placebo + GBT placebo                              | 24m      | UAE; FBG; A1C; TC; TG; LDLC; HDLC; SBP; DBP |
| Yang, 2014 <sup>40</sup> | 142 (80/62)       | 48.5 | NS            | Albuminuria 30-300 mg/24h;                                              | T: Qi Ming granule 4.5g tid<br>C: placebo                                                                                           | 3m       | UAE; FBG; TC; TG; LDLC; HDLC                |

|                              |                  |       |    |                                                                                           |                                                                                                                                                |    |                                                                       |
|------------------------------|------------------|-------|----|-------------------------------------------------------------------------------------------|------------------------------------------------------------------------------------------------------------------------------------------------|----|-----------------------------------------------------------------------|
|                              |                  |       |    | Normal Scr level                                                                          |                                                                                                                                                |    |                                                                       |
| Zhou, 2014 <sup>45</sup>     | 48<br>(27/21)    | 58.5  | 2  | Proteinuria $\leq$ 3.5 g/24h;<br>Normal Scr level                                         | T: Qi Wei granule 6g tid<br>C: placebo                                                                                                         | 3m | UAE; 24hUP; Scr;<br>GFR; FBG; A1C;<br>SBP; DBP                        |
| Li, 2015 <sup>24</sup>       | 180<br>(100/80)  | 59.0  | 2  | Albuminuria $>$ 20 $\mu$ g/min<br>or Proteinuria 0.5-2<br>g/24h<br>GFR 60-130 mL/min      | T: Tang Shen granule 8g bid +<br>ACEi/ARB<br>C: placebo + ACEi/ARB                                                                             | 6m | UAE; 24hUP; Scr;<br>GFR; A1C; TC; TG;<br>LDLC; HDLC; SBP;<br>DBP; QoL |
| Liu, 2015 <sup>33</sup>      | 60<br>(NS)       | 20-70 | 2  | Albuminuria 20-200<br>$\mu$ g/min or Proteinuria $\leq$<br>3.5 g/24h<br>GFR $>$ 60 mL/min | T: Qi Huang capsule 1.9g tid +<br>losartan<br>C: placebo + losartan                                                                            | 6m | 24hUP; Scr                                                            |
| Ni, 2013 <sup>36</sup>       | 224<br>(112/112) | 54.7  | NS | Albuminuria 20-200<br>$\mu$ g/min or Proteinuria $\leq$<br>3.5 g/24h<br>GFR 60-130 mL/min | T: Qi Yao Xiao Ke capsule 2.4g<br>tid + benazepril<br>C: placebo + benazepril                                                                  | 3m | UAE; 24hUP; Scr;<br>GFR; FBG; A1C; TC;<br>TG; LDLC; HDLC              |
| Yang, 2017 <sup>41</sup>     | 25<br>(23/2)     | 59.3  | 2  | Albuminuria 20-200<br>$\mu$ g/min or 30-300<br>mg/24h                                     | T: Qi Zhu granule 1 bag bid +<br>irbesartan<br>C: placebo + irbesartan                                                                         | 6m | UAE; Scr; GFR FBG;<br>A1C; TC; TG; LDLC;<br>HDLC                      |
| Zhang, 2006 <sup>42-44</sup> | 221<br>(119/102) | 61.9  | NS | Proteinuria $<$ 10g/24h;<br>Scr 133-354 $\mu$ mol/L or<br>Ccr 30-70 mL/min                | T 1: Modified Qi Wei granule 1<br>bag bid + losartan<br>T 2: Modified Qi Wei granule 1<br>bag bid + losartan simulant<br>C: placebo + losartan | 3m | 24hUP; Scr; GFR;<br>QoL                                               |
| Gao, 2006 <sup>26</sup>      | 90<br>(NS)       | 35-70 | 2  | Albuminuria 20-200<br>$\mu$ g/min or 30-300<br>mg/24h                                     | T: Tang Shen Ning granule 5g tid<br>+ benazepril simulant<br>C: placebo + benazepril                                                           | 2m | UAE; Scr;                                                             |
| Gao, 2017                    | 250              | 52.3  | 2  | Albuminuria 30-300                                                                        | T: Tang Shen Ning granule 8g tid                                                                                                               | 3m | UAE; Scr; FBG; A1C                                                    |

1  
2  
3  
4  
5  
6  
7  
8  
9  
10  
11  
12  
13  
14  
15  
16  
17  
18  
19  
20  
21  
22  
23  
24  
25  
26  
27  
28  
29  
30  
31  
32  
33  
34  
35  
36  
37  
38  
39  
40  
41  
42  
43  
44  
45  
46

|                   |                  |       |    |                                                                  |                                                                                                                               |     |                                        |
|-------------------|------------------|-------|----|------------------------------------------------------------------|-------------------------------------------------------------------------------------------------------------------------------|-----|----------------------------------------|
| 27                | (116/134)        |       |    | mg/24h                                                           | + losartan simulant<br>C: placebo + losartan                                                                                  |     |                                        |
| Han, 2014<br>28   | 104<br>(NS)      | 30-78 | 2  | Proteinuria ≥ 0.5 g/24h<br>Scr < 265 μmol/L                      | T1: Bao Shen pill 1 bag bid +<br>Tripterygium glycosides 20mg tid<br>T2: Bao Shen pill 1 bag bid<br>C: BS placebo + valsartan | 1m  | 24hUP; Scr                             |
| Jia, 2015<br>29   | 56<br>(31/25)    | 59.6  | NS | Proteinuria < 10g/24h;<br>Scr < 265 μmol/L                       | T: San Huang Yi Shen granule 1<br>bag bid + irbesartan simulant<br>C: placebo + irbesartan                                    | 3m  | GFR                                    |
| Li, 2012<br>31 46 | 315<br>(194/121) | 58.1  | NS | Proteinuria <10g/24h;<br>Scr < 265 μmol/L or<br>GFR > 40 mL/min; | T: Modified Qi Wei granule 4.5g<br>bid<br>C: placebo + irbesartan                                                             | 24m | Mortality; Composite<br>endpoints; QoL |
| Lin, 2000<br>32   | 119<br>(46/73)   | 55.3  | NS | Proteinuria < 0.5 g/24h;<br>Normal Scr level                     | T: Tang Wei Kang capsule 2g tid<br>C: Captopril (same appearance as<br>herbal capsule)                                        | 3m  | UAE; FBG; A1C; TC;<br>TG; HDLC         |

Abbreviation: M/F, male versus female; NS, not specified in the original reports; T, tested group; C, control group; qd, once daily; bid, twice daily; tid, thrice daily; m, months; Scr, serum creatinine concentration; Ccr, creatinine clearance rate; GFR, glomerular filtration rate; UAE, urinary albuminuria excretion; 24hUP, 24-hour proteinuria; FBG, fasting blood glucose; A1C, glycated haemoglobin; TC, total cholesterol; TG, triglycerides; LDL-C, low-density lipoprotein cholesterol; HDL-C, high-density lipoprotein cholesterol; SBP, systolic blood pressure; DBP, diastolic blood pressure; QoL, quality of life.

**Table 2 Herbal Ingredients Used in Included Studies**

| Study                    | Formulae Name                                 | Ingredients                                                                                                                                                                                                                                                                           |
|--------------------------|-----------------------------------------------|---------------------------------------------------------------------------------------------------------------------------------------------------------------------------------------------------------------------------------------------------------------------------------------|
| Fan, 2010 <sup>25</sup>  | Qi Kui granule                                | Astragali Radix; Polygoni Multiflori Radix; Abelmoschi Corolla                                                                                                                                                                                                                        |
| Jia, 2012 <sup>30</sup>  | Qi Wei granule                                | Astragali Radix; Rehmanniae Radix; Rhei Radix et Rhizoma; Prunellae Spica; Curcumae Rhizoma; Euonymus Alatus; Notoginseng Radix et Rhizoma                                                                                                                                            |
| Ma, 2011a <sup>34</sup>  | Arctiin granule                               | Arctii Fructus                                                                                                                                                                                                                                                                        |
| Ma, 2011b <sup>35</sup>  | Arctiin granule                               | Arctii Fructus                                                                                                                                                                                                                                                                        |
| Wei, 2012 <sup>37</sup>  | Xue Zhi Kang capsule                          | Fermentum Rubrum*                                                                                                                                                                                                                                                                     |
| Wei, 2016 <sup>38</sup>  | Gan Di capsue                                 | Scutellariae Radix; Astragali Radix; Corni Fructus; Rehmanniae Radix Phyllanthi Fructus; Leonuri Herba Leonuri Herba; Bombyx Batryticatus; Sophorae Flos (stir fry processed)                                                                                                         |
| Xie, 2011 <sup>39</sup>  | Liu Wei Di Huang pill<br>Ginkgo biloba tablet | Rehmanniae Radix; Corni Fructus; Dioscoreae Rhizoma; Alismatis Rhizoma; Moutan Cortex; Poria; Ginkgo Folium                                                                                                                                                                           |
| Yang, 2014 <sup>40</sup> | Qi Ming granule                               | Astragali Radix; Puerariae Lobatae Radix; Rehmanniae Radix; Lycii Fructus; Cassiae Semen; Leonuri Fructus; Typhae Pollen; Hirudo                                                                                                                                                      |
| Zhou, 2014 <sup>45</sup> | Qi Wei granule                                | Astragali Radix; Rehmanniae Radix; Rhei Radix et Rhizoma; Prunellae Spica; Curcumae Rhizoma; Euonymus Alatus; Notoginseng Radix et Rhizoma                                                                                                                                            |
| Li, 2015 <sup>24</sup>   | Tang Shen granule                             | Astragali Radix; Rehmanniae Radix; Rhei Radix et Rhizoma; Notoginseng Radix et Rhizoma; Euonymus Alatus; Corni Fructus; Aurantii Fructus                                                                                                                                              |
| Liu, 2015 <sup>33</sup>  | Qi Huang capsule                              | Astragali Radix; Rehmanniae Radix; Ligustri Lucidi Fructus; Hirudo; Bombyx Batryticatus; Eupolyphaga Steleophaga; Rhei Radix et Rhizoma; <i>Gymnema sylvestre</i> *; Sinomenii Caulis; Plantaginis Semen                                                                              |
| Ni, 2013 <sup>36</sup>   | Qi Yao Xiao Ke capsule                        | Panacis Quinquefolii Radix; Astragali Radix; Rehmanniae Radix; Dioscoreae Rhizoma; Corni Fructus; Lycii Fructus; Ophiopogonis Radix; Anemarrhenae Rhizoma; Trichosanthis Radix; Puerariae Lobatae Radix; Schisandrae Chinensis Fructus Schisandrae Chinensis Fructus; Galla Chinensis |
| Yang, 2017 <sup>41</sup> | Qi Zhu granule                                | Astragali Radix; Ligustri Lucidi Fructus; Atractylodis Macrocephalae Rhizoma; Abelmoschi Corolla; Rosae laevigatae Fructus Dioscoreae Spongiosae Rhizoma; Paeoniae Radix Rubra; Coptidis Rhizoma                                                                                      |

|                         |                                           |                                                                                                                                                                                                          |
|-------------------------|-------------------------------------------|----------------------------------------------------------------------------------------------------------------------------------------------------------------------------------------------------------|
| Zhang, 2006<br>42-44    | Modified Qi Wei granule                   | Astragali Radix; Rehmanniae Radix; Prunellae Spica; Rhei Radix et Rhizoma; Euonymus Alatus; Epimedii Folium; Corni Fructus; Curcumae Longae Rhizoma                                                      |
| Gao, 2006 <sup>26</sup> | Tang Shen Ning granule                    | Astragali Radix; Rehmanniae Radix; Euryales Semen; Corni Fructus; Rhei Radix et Rhizoma; Chuanxiong Rhizoma                                                                                              |
| Gao, 2017 <sup>27</sup> | Tang Shen Ning granule                    | Astragali Radix; Euryales Semen; Rosae laevigatae Fructus; Rhei Radix et Rhizoma; Chuanxiong Rhizoma                                                                                                     |
| Han, 2014 <sup>28</sup> | Bao Shen pill;<br>Tripterygium glycosides | Not given.                                                                                                                                                                                               |
| Jia, 2015 <sup>29</sup> | San Huang Yi Shen granule                 | Astragali Radix; Curcumae Longae Rhizoma; Rhei Radix et Rhizoma; Chuanxiong Rhizoma; Angelicae Sinensis Radix; Salviae Miltiorrhizae Radix et Rhizoma; Cervi Cornu; Anemarrhenae Rhizoma; Arctii Fructus |
| Li, 2012<br>31 46       | Modified Qi Wei granule                   | Astragali Radix; Rehmanniae Radix; Prunellae Spica; Rhei Radix et Rhizoma; Euonymus Alatus; Epimedii Folium; Corni Fructus; Curcumae Longae Rhizoma                                                      |
| Lin, 2000 <sup>32</sup> | Tang Wei Kang capsule                     | Astragali Radix; Ligustri Lucidi Fructus; Rhei Radix et Rhizoma                                                                                                                                          |

Note: All ingredients are the standardised pharmaceutical name from the Chinese Pharmacopoeia 2015. \* *Monascus purpureus* Went. (Red Rice Yeast); pharmaceutical name not included in Chinese Pharmacopoeia 2015.

**Table 3 Summary of Findings Table**

| Outcomes                                                                                  | Anticipated absolute effects*<br>(95% CI)  |                                                                                                          | Relative effect<br>(95% CI)  | No. of participants<br>(studies) | Quality of the evidence<br>(GRADE) |
|-------------------------------------------------------------------------------------------|--------------------------------------------|----------------------------------------------------------------------------------------------------------|------------------------------|----------------------------------|------------------------------------|
|                                                                                           | Risk with Placebo                          | Risk with CHM                                                                                            |                              |                                  |                                    |
| <b>Comparison 1: CHM versus Placebo</b>                                                   |                                            |                                                                                                          |                              |                                  |                                    |
| Albuminuria<br>follow up: range<br>2 to 12 months                                         | -                                          | SMD 0.92 lower<br>(1.35 lower to 0.51<br>lower)                                                          | -                            | 1021<br>(8 RCTs)                 | ⊕⊕⊕○<br>MODERATE<br>a, b           |
| 24-hour proteinuria<br>follow up: range<br>2 to 3 months                                  | -                                          | SMD 1.34 lower<br>(2.18 lower to 0.51<br>lower)                                                          | -                            | 699<br>(4 RCTs)                  | ⊕⊕○○<br>LOW a, b, c                |
| Serum creatinine<br>(Scr)<br>follow up: range<br>3 to 6 months                            | The mean<br>Scr was<br>77.41<br>μmol/L     | The mean Scr in the<br>intervention group was<br>5.75 μmol/L higher<br>(2.06 lower to 13.57<br>higher)   | -                            | 85<br>(2 RCTs)                   | ⊕⊕⊕○<br>MODERATE<br>a, d           |
| Estimated<br>glomerular<br>filtration rate<br>(eGFR)<br>follow up: mean<br>3 months       | The mean<br>eGFR<br>was<br>96.24<br>mL/min | The mean eGFR in the<br>intervention group was<br>10.71 mL/min lower<br>(23.93 lower to 2.51<br>higher)  | -                            | 44<br>(1 RCT)                    | ⊕⊕○○<br>LOW a, d                   |
| <b>Comparison 2: Placebo + ACEi/ ARB versus CHM +ACEi/ARB</b>                             |                                            |                                                                                                          |                              |                                  |                                    |
| Albuminuria<br>follow up: range<br>3 to 6 months                                          | -                                          | SMD 0.56 lower<br>(1.04 lower to 0.08<br>lower)                                                          | -                            | 330<br>(3 RCTs)                  | ⊕⊕⊕○<br>MODERATE<br>d, e           |
| 24h-proteinuria<br>follow up: range<br>3 to 6 months                                      | -                                          | SMD 0.15 lower<br>(0.52 lower to 0.23<br>higher)                                                         | -                            | 489<br>(4 RCTs)                  | ⊕⊕○○<br>LOW b, d, e                |
| Serum creatinine<br>(Scr)<br>follow up: range<br>3 to 6 months                            | The mean<br>Scr was<br>88.13<br>μmol/L     | The mean Scr in the<br>intervention group was<br>4.02 μmol/L lower<br>(7.81 lower to 0.23<br>lower)      | -                            | 595<br>(5 RCTs)                  | ⊕⊕⊕○<br>MODERATE<br>a, c           |
| Estimated<br>glomerular<br>filtration rate<br>(eGFR)<br>follow up: range<br>3 to 6 months | The mean<br>eGFR<br>was<br>79.27<br>mL/min | The mean eGFR in the<br>intervention group was<br>6.28 mL/min higher<br>(2.42 higher to 10.14<br>higher) | -                            | 535<br>(4 RCTs)                  | ⊕⊕⊕○<br>MODERATE<br>c, e           |
| <b>Comparison 3: CHM versus Placebo + ACEi/ ARB</b>                                       |                                            |                                                                                                          |                              |                                  |                                    |
| All-cause mortality<br>follow up: mean<br>24 months                                       | 0 per 1,000                                | 0 per 1,000<br>(0 to 0)                                                                                  | not<br>estimable             | 315<br>(1 RCT)                   | ⊕⊕⊕○<br>MODERATE<br>f              |
| Composite end-<br>points events<br>follow up: mean<br>24 months                           | 133 per<br>1,000                           | 45 per 1,000<br>(20 to 102)                                                                              | RR 0.34<br>(0.15 to<br>0.77) | 315<br>(1 RCT)                   | ⊕⊕○○<br>LOW d, g                   |
| Albuminuria<br>follow up: mean<br>3 months                                                | -                                          | SMD 6.38 lower<br>(9.01 lower to 3.75<br>lower)                                                          | -                            | 499<br>(3 RCTs)                  | ⊕○○○<br>VERY LOW a,<br>b, d        |
| 24h-proteinuria<br>follow up: range<br>1 to 3 months                                      | -                                          | SMD 0.00 lower<br>(0.32 lower to 0.32<br>higher)                                                         | -                            | 260<br>(2 RCTs)                  | ⊕⊕⊕○<br>LOW d, h                   |
| Serum creatinine<br>(Scr)                                                                 | The mean<br>Scr was                        | The mean Scr in the<br>intervention group was                                                            | -                            | 590<br>(4 RCTs)                  | ⊕⊕⊕○<br>MODERATE                   |

|                                                                                           |                                            |                                                                                                           |   |                 |                                |
|-------------------------------------------------------------------------------------------|--------------------------------------------|-----------------------------------------------------------------------------------------------------------|---|-----------------|--------------------------------|
| follow up: range<br>1 to 3 months                                                         | 105.52<br>μmol/L                           | 4.05 μmol/L lower<br>(6.09 lower to 2.01<br>lower)                                                        |   |                 | a, c                           |
| Estimated<br>glomerular<br>filtration rate<br>(eGFR)<br>follow up: range<br>1 to 3 months | The mean<br>eGFR<br>was<br>97.24<br>mL/min | The mean eGFR in the<br>intervention group<br>was 0.57 mL/min<br>lower<br>(11.01 lower to 9.88<br>higher) | - | 542<br>(4 RCTs) | ⊕⊕○○<br>LOW <sup>a, b, c</sup> |

\*The risk in the intervention group (and its 95% confidence interval) is based on the assumed risk in the comparison group and the relative effect of the intervention (and its 95% CI).

Abbreviation: Confidence interval (CI); Mean difference (MD); Standardised mean difference (SMD); Risk ratio (RR)

GRADE justification: a. Unclear risk of bias of randomization and allocation concealment; b. Significant heterogeneity; c. Wide confidence interval; d. Small sample size and wide confidence interval; e. High or unclear risk of attrition bias; f. Low events rate lead to imprecise estimation and small simple size; g. Number of patients progressed to ESRD were included in composite outcomes, not solely reported; h. Unclear risk of attrition bias and potential selecting report bias;

## Figure Legends

### Figure 1 PRISMA flowchart of searching and screening

### Figure 2 Risk-of-bias of included studies

Note: The red dot indicates high risk of bias, yellow indicates unclear risk of bias and green dot indicates low risk of bias.

### Figure 3. Forest plot of primary outcomes

Note: Panel (a) albuminuria outcomes; (b) proteinuria outcomes; (c) serum creatinine outcomes; (d) estimated glomerulus filtration rate outcomes.

Abbreviation: CHM, Chinese herbal medicine; ACEi, angiotensin converting enzyme inhibitors; ARB, angiotensin receptor blockers; Std, standard.



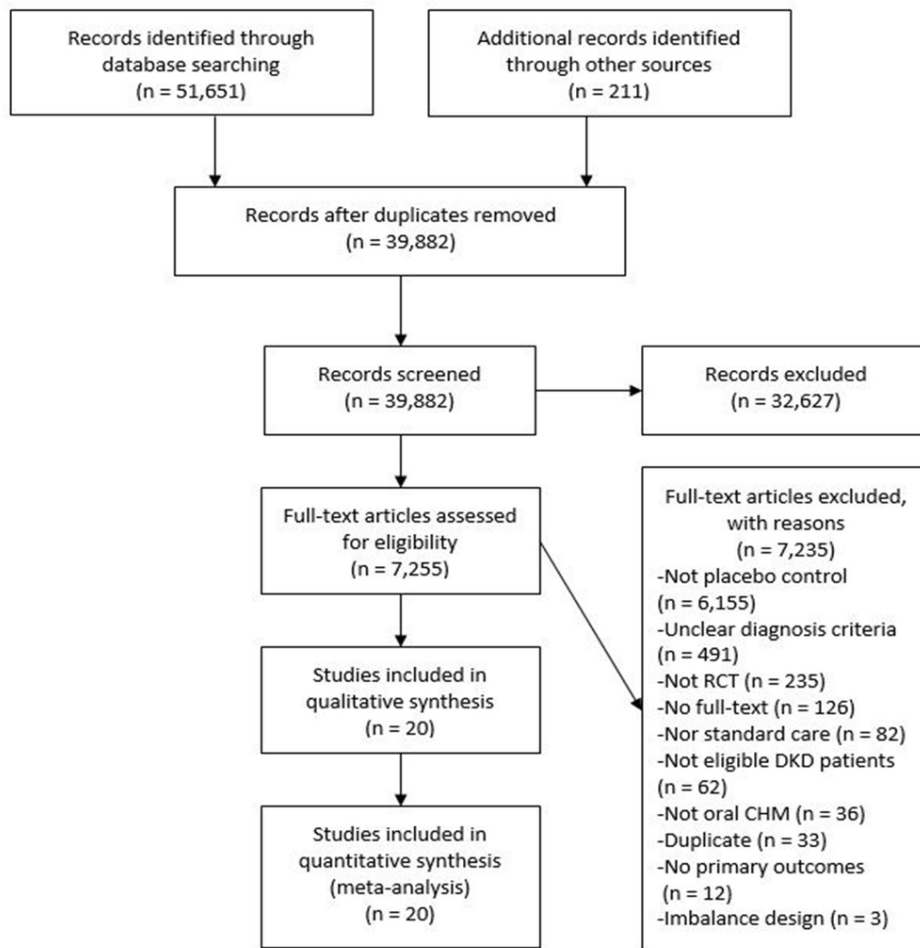

Figure 1 PRISMA flowchart of searching and screening

89x89mm (300 x 300 DPI)

1  
2  
3  
4  
5  
6  
7  
8  
9  
10  
11  
12  
13  
14  
15  
16  
17  
18  
19  
20  
21  
22  
23  
24  
25  
26  
27  
28  
29  
30  
31  
32  
33  
34  
35  
36  
37  
38  
39  
40  
41  
42  
43  
44  
45  
46  
47  
48  
49  
50  
51  
52  
53  
54  
55  
56  
57  
58  
59  
60

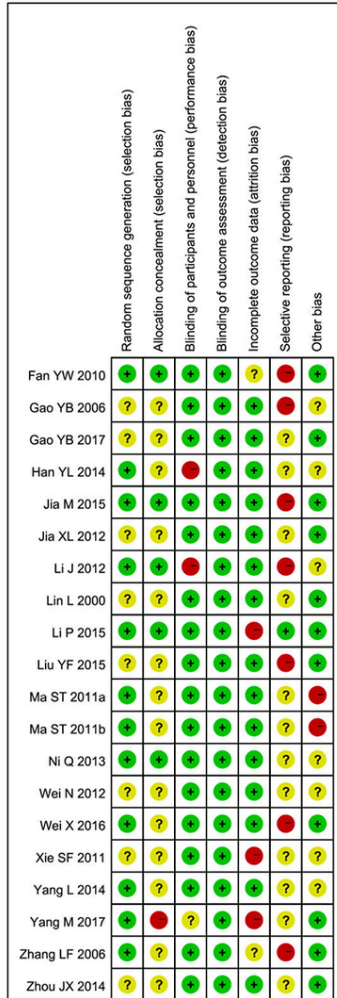

Figure 2 Risk-of-bias of included studies

Note: The red dot indicates high risk of bias, yellow indicates unclear risk of bias and green dot indicates low risk of bias.

89x89mm (300 x 300 DPI)

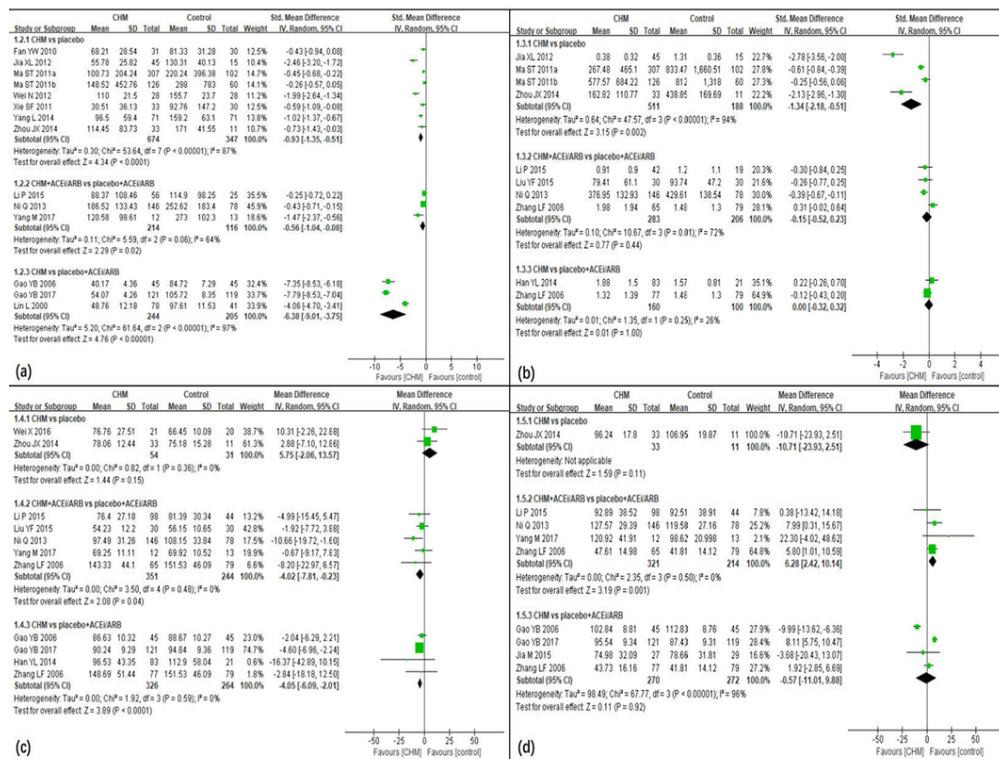

Figure 3. Forest plot of primary outcomes

Note: Panel (a) albuminuria outcomes; (b) proteinuria outcomes; (c) serum creatinine outcomes; (d) estimated glomerulus filtration rate outcomes.

Abbreviation: CHM, Chinese herbal medicine; ACEi, angiotensin converting enzyme inhibitors; ARB, angiotensin receptor blockers; Std, standard.

89x89mm (300 x 300 DPI)

1  
2  
3  
4  
5  
6  
7  
8  
9  
10  
11  
12  
13  
14  
15  
16  
17  
18  
19  
20  
21  
22

# Chinese Herbal Medicine for Diabetic Kidney Disease: A Systematic Review and Meta-analysis of Randomised Placebo-controlled Trials

## Supplementary Appendix

23  
24  
25  
26  
27  
28  
29  
30  
31  
32  
33  
34  
35  
36  
37  
38  
39  
40  
41  
42  
43  
44  
45  
46  
47  
48  
49  
50  
51  
52  
53  
54  
55  
56  
57  
58  
59  
60

Table S1: Search strategy of MEDLINE.

Table S2: Subgroup analysis of primary outcomes

Table S3: Meta-analysis results of secondary outcomes

Table S4: Sensitivity analysis of primary outcomes

**Table S1: Search Strategy of MEDLINE**

| Search Block | Search terms                                                                                                                                                                                                                                                                                                                                                                                                                                                   |
|--------------|----------------------------------------------------------------------------------------------------------------------------------------------------------------------------------------------------------------------------------------------------------------------------------------------------------------------------------------------------------------------------------------------------------------------------------------------------------------|
| Intervention | Traditional Chinese Medicine OR Chinese Traditional Medicine OR Chinese Herbal Drugs OR Chinese Drugs, Plant OR Medicine, Traditional OR Ethnopharmacology OR Ethnomedicine OR Ethnobotany OR Medicine, Kampo OR Kanpo OR TCM OR Medicine, Ayurvedic OR Phytotherapy OR Herbology OR Plants, Medicinal OR Plant Preparation OR Plant Extract OR Plants, Medicine OR Materia Medica OR Single Prescription OR Chinese Medicine Herb OR Herbal Medicine OR Herbs |
| Condition    | Diabetic Nephropathies OR Diabetic Nephropathy OR Diabetic Kidney Disease OR Diabetic Kidney Diseases OR Kimmelstiel Wilson Syndrome OR Kimmelstiel Wilson Disease OR Diabetic Glomerulosclerosis OR Nodular Glomerulosclerosis OR Intracapillary Glomerulosclerosis OR albuminuria OR Microalbuminuria OR proteinuria OR Glomerulosclerosis OR Glomerulonephritis OR Kimmelstiel wilson nephropathy OR diabetic nephrosclerosis                               |
| Study design | Systematic[sb] OR "randomized controlled trial"[pt] OR "controlled clinical trial"[pt] OR "randomized"[tiab] OR "placebo"[tiab] OR "drug therapy"[sh] OR "randomly"[tiab] OR "trial"[tiab] OR "groups"[tiab] OR "cohort studies"[mesh] OR "case-control studies"[mesh] OR "comparative study"[pt] OR "risk factors"[mesh] OR "cohort"[tw] OR "compared"[tw] OR "groups"[tw] OR "case control"[tw] OR "multivariate"[tw] OR "case series"[tw]                   |

Note: The three search blocks were connected with Boolean operators 'AND' to build the overall search terms.

Table S2: Subgroup Analysis of Primary Outcomes

| Outcome or Subgroup                                           | Studies | Pts | Statistical Method | Effect Estimate (95%CI)    | I <sup>2</sup> | p value  |
|---------------------------------------------------------------|---------|-----|--------------------|----------------------------|----------------|----------|
| <b>Urinary albumin excretion</b>                              |         |     |                    |                            |                |          |
| <b><i>Subgroup-CHM formulae</i></b>                           |         |     |                    |                            |                |          |
| Qiwei Granules                                                | 2       | 104 | MD                 | -70.06 [-88.84, -51.28]    | 0%             | p<0.0001 |
| Arctiin Granules                                              | 2       | 595 | Std. MD            | -0.38 [-0.56, -0.20]       | 0%             | p<0.0001 |
| Tang shen ning Formulae group                                 | 2       | 330 | MD                 | -48.16 [-55.12, -41.20]    | 95%            | p<0.0001 |
| <b><i>Subgroup-Measurements</i></b>                           |         |     |                    |                            |                |          |
| CHM vs placebo-AER                                            | 1       | 186 | MD                 | -149.48 [-362.79, 63.83]   | NA             | p=0.17   |
| CHM vs placebo-ACR                                            | 2       | 124 | MD                 | -30.53 [-76.59, 15.53]     | 66%            | p=0.19   |
| CHM vs placebo-UAE                                            | 5       | 711 | MD                 | -60.91 [-76.82, -45.01]    | 53%            | p<0.0001 |
| CHM vs placebo + ACEi/ARB-AER                                 | 1       | 119 | MD                 | -48.85 [-53.30, -44.40]    | NA             | p<0.0001 |
| CHM vs placebo + ACEi/ARB-UAE                                 | 2       | 330 | MD                 | -48.16 [-55.12, -41.20]    | 95%            | p<0.0001 |
| <b>24-hour proteinuria</b>                                    |         |     |                    |                            |                |          |
| <b><i>Subgroup-baseline UP</i></b>                            |         |     |                    |                            |                |          |
| CHM vs placebo-baseline UP < 0.5g/d                           | 2       | 453 | MD                 | -378.34 [-649.90, -106.77] | 63%            | p=0.006  |
| CHM vs placebo-baseline UP > 0.5g/d                           | 2       | 246 | Std. MD            | -1.49 [-3.97, 0.99]        | 97%            | p=0.24   |
| CHM + ACEi/ARB vs placebo + ACEi/ARB<br>-baseline UP < 0.5g/d | 2       | 284 | MD                 | -31.30 [-68.61, 6.02]      | 61%            | p=0.10   |
| CHM + ACEi/ARB vs placebo + ACEi/ARB<br>-baseline UP > 0.5g/d | 2       | 205 | MD                 | 0.11 [-0.67, 0.88]         | 74%            | p=0.79   |
| <b><i>Subgroup-CHM formulae</i></b>                           |         |     |                    |                            |                |          |
| Qiwei Granules                                                | 2       | 104 | Std. MD            | -2.47 [-3.11, -1.83]       | 21%            | p<0.0001 |
| Arctiin Granules                                              | 2       | 595 | MD                 | -407.65 [-732.24, -83.05]  | 45%            | p=0.01   |
| Tang shen fang group                                          | 2       | 205 | MD                 | 0.11 [-0.67, 0.88]         | 74%            | p=0.79   |
| <b><i>Subgroup-Measurements</i></b>                           |         |     |                    |                            |                |          |
| CHM vs placebo-g/24h                                          | 1       | 60  | MD                 | -0.93 [-1.13, -0.73]       | NA             | p<0.0001 |
| CHM vs placebo-mg/24h                                         | 3       | 639 | MD                 | -324.42 [-485.15, -163.69] | 30%            | p<0.0001 |

|                                                             |   |     |    |                       |     |          |
|-------------------------------------------------------------|---|-----|----|-----------------------|-----|----------|
| CHM + ACEi/ARB vs placebo + ACEi/ARB-g/24h                  | 2 | 205 | MD | 0.11 [-0.67, 0.88]    | 74% | p=0.79   |
| CHM + ACEi/ARB vs placebo + ACEi/ARB-mg/24h                 | 2 | 284 | MD | -31.30 [-68.61, 6.02] | 61% | p=0.10   |
| <b>Serum creatinine level</b>                               |   |     |    |                       |     |          |
| <b><i>Subgroup-baseline Scr</i></b>                         |   |     |    |                       |     |          |
| CHM + ACEi/ARB vs placebo + ACEi/ARB -baseline Scr normal   | 3 | 227 | MD | -2.12 [-6.48, 2.23]   | 0%  | p=0.34   |
| CHM + ACEi/ARB vs placebo + ACEi/ARB -baseline Scr abnormal | 2 | 368 | MD | -9.99 [-17.71, -2.26] | 0%  | p=0.01   |
| CHM vs placebo + ACEi/ARB-baseline Scr normal               | 3 | 434 | MD | -4.07 [-6.13, -2.01]  | 0%  | p=0.0001 |
| CHM vs placebo + ACEi/ARB-baseline Scr abnormal             | 1 | 156 | MD | -2.84 [-18.18, 12.50] | NA  | p=0.72   |
| <b><i>Subgroup-CHM formulae</i></b>                         |   |     |    |                       |     |          |
| Tang shen fang group                                        | 2 | 286 | MD | -6.06 [-14.60, 2.47]  | 0%  | p=0.16   |
| Tang shen ning Formulae group                               | 2 | 330 | MD | -3.96 [-6.13, -1.78]  | 6%  | p=0.0004 |
| <b>Glomerular filtration rate</b>                           |   |     |    |                       |     |          |
| <b><i>Subgroup-baseline GFR</i></b>                         |   |     |    |                       |     |          |
| CHM + ACEi/ARB vs placebo + ACEi/ARB -baseline GFR>90       | 2 | 249 | MD | 9.38 [1.07, 17.70]    | 4%  | p=0.03   |
| CHM + ACEi/ARB vs placebo + ACEi/ARB -baseline GFR<90       | 2 | 286 | MD | 5.22 [0.69, 9.74]     | 0%  | p=0.02   |
| CHM vs placebo + ACEi/ARB-baseline GFR>90                   | 1 | 90  | MD | -9.99 [-13.62, -6.36] | NA  | p<0.0001 |
| CHM vs placebo + ACEi/ARB-baseline GFR<90                   | 3 | 452 | MD | 4.48 [-1.32, 10.28]   | 70% | p=0.13   |
| <b><i>Subgroup-CHM formulae</i></b>                         |   |     |    |                       |     |          |
| Tang shen fang group                                        | 2 | 286 | MD | 5.22 [0.69, 9.74]     | 0%  | p=0.02   |
| Tang shen ning Formulae group                               | 2 | 330 | MD | -0.89 [-18.62, 16.85] | 99% | p=0.92   |

| <i>Subgroup-Measurements</i>              |   |     |    |                      |     |        |
|-------------------------------------------|---|-----|----|----------------------|-----|--------|
| CHM + ACEi/ARB vs placebo + ACEi/ARB-Ccr  | 1 | 144 | MD | 5.80 [1.01, 10.59]   | NA  | p=0.02 |
| CHM + ACEi/ARB vs placebo + ACEi/ARB-eGFR | 3 | 391 | MD | 7.13 [-0.29, 14.56]  | 11% | p=0.06 |
| CHM vs placebo + ACEi/ARB-Ccr             | 2 | 246 | MD | -4.14 [-15.81, 7.53] | 93% | p=0.49 |
| CHM vs placebo + ACEi/ARB-eGFR            | 2 | 296 | MD | 5.25 [-4.65, 15.15]  | 46% | p=0.30 |

Abbreviation: Pts, patients; CI, confident interval; NA, not applicable. CHM, Chinese herbal medicine; ACEi, angiotensin converting enzyme inhibitors; ARB, angiotensin receptor blockers; MD, mean differences; Std, standard.; AER, albuminuria excretion rate; ACR, albuminuria to creatinine ratio; UAE, urinary albuminuria excretion; UP, urinary proteinuria; GFR, glomerular filtration rate; Scr, serum creatinine concentration; Ccr, creatinine clearance.



**Table S3 Meta-analysis Results of Secondary Outcomes**

| Outcome                        | Studies | Participants | Effect Estimate<br>(95% CI) | I <sup>2</sup> | p value |
|--------------------------------|---------|--------------|-----------------------------|----------------|---------|
| Fasting blood sugar            | 9       | 962          | -0.45 [-1.15, 0.25]         | 93%            | p=0.21  |
| Haemoglobin A1c                | 8       | 901          | 0.04 [-0.17, 0.24]          | 59%            | p=0.73  |
| Total cholesterol              | 8       | 815          | -0.96 [-1.70, -0.21]        | 95%            | p=0.01  |
| Triglyceride                   | 8       | 815          | -0.60 [-1.01, -0.19]        | 90%            | p=0.004 |
| Low-density lipoprotein        | 7       | 696          | -0.51 [-0.93, -0.09]        | 92%            | p=0.02  |
| High-density lipoprotein       | 8       | 815          | 0.14 [-0.04, 0.33]          | 93%            | p=0.12  |
| Systolic blood pressure        | 3       | 252          | 0.64 [-0.90, 2.17]          | 0%             | p=0.43  |
| Diastolic blood pressure       | 3       | 252          | 0.14 [-2.02, 2.29]          | 52%            | p=0.90  |
| Diabetes quality of life score | 2       | 461          | 0.07 [-3.87, 4.00]          | 54%            | p=0.97  |

Note: All outcomes analysed with mean difference. Abbreviation: CI, confident interval

**Table S4: Sensitivity Analysis of Primary Outcomes**

| Outcomes                          | Studies | Participants | Statistical Method   | Effect Estimate (95% CI)  | I <sup>2</sup> | p value  |
|-----------------------------------|---------|--------------|----------------------|---------------------------|----------------|----------|
| <b>Urinary albumin excretion</b>  |         |              |                      |                           |                |          |
| CHM vs placebo                    | 4       | 798          | Std. Mean Difference | -0.54 [-0.85, -0.22]      | 73%            | p=0.0009 |
| CHM+ACEi/ARB vs placebo+ACEi/ARB  | 3       | 330          | Std. Mean Difference | -0.56 [-1.04, -0.08]      | 64%            | p=0.02   |
| <b>24-hour proteinuria</b>        |         |              |                      |                           |                |          |
| CHM vs placebo                    | 2       | 595          | Mean Difference      | -407.65 [-732.24, -83.05] | 45%            | p=0.01   |
| CHM+ACEi/ARB vs placebo+ACEi/ARB  | 3       | 429          | Std. Mean Difference | -0.12 [-0.60, 0.37]       | 81%            | p=0.63   |
| CHM vs placebo+ACEi/ARB           | 2       | 260          | Std. Mean Difference | 0.00 [-0.32, 0.32]        | 26%            | p=1.00   |
| <b>Serum creatinine level</b>     |         |              |                      |                           |                |          |
| CHM vs placebo                    | 1       | 41           | Mean Difference      | 10.31 [-2.26, 22.88]      | NA             | p=0.11   |
| CHM+ACEi/ARB vs placebo+ACEi/ARB  | 4       | 535          | Mean Difference      | -5.59 [-10.61, -0.58]     | 0%             | p=0.03   |
| CHM vs placebo+ACEi/ARB           | 2       | 260          | Mean Difference      | -6.23 [-19.51, 7.05]      | 0%             | p=0.36   |
| <b>Glomerular filtration rate</b> |         |              |                      |                           |                |          |
| CHM+ACEi/ARB vs placebo+ACEi/ARB  | 4       | 535          | Mean Difference      | 6.28 [2.42, 10.14]        | 0%             | p=0.001  |
| CHM vs placebo+ACEi/ARB           | 2       | 212          | Mean Difference      | 1.50 [-3.08, 6.09]        | 0%             | p=0.52   |

Abbreviation: NA, not applicable. CHM, Chinese herbal medicine; ACEi, angiotensin converting enzyme inhibitors; ARB, angiotensin receptor blockers; Std, standard

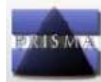

# PRISMA 2009 Checklist

1  
2  
3  
4  
5  
6  
7  
8  
9  
10  
11  
12  
13  
14  
15  
16  
17  
18  
19  
20  
21  
22  
23  
24  
25  
26  
27  
28  
29  
30  
31  
32  
33  
34  
35  
36  
37  
38  
39  
40  
41  
42  
43  
44  
45  
46  
47

| Section/topic                      | #  | Checklist item                                                                                                                                                                                                                                                                                              | Reported on page # |
|------------------------------------|----|-------------------------------------------------------------------------------------------------------------------------------------------------------------------------------------------------------------------------------------------------------------------------------------------------------------|--------------------|
| <b>TITLE</b>                       |    |                                                                                                                                                                                                                                                                                                             |                    |
| Title                              | 1  | Identify the report as a systematic review, meta-analysis, or both.                                                                                                                                                                                                                                         | P1                 |
| <b>ABSTRACT</b>                    |    |                                                                                                                                                                                                                                                                                                             |                    |
| Structured summary                 | 2  | Provide a structured summary including, as applicable: background; objectives; data sources; study eligibility criteria, participants, and interventions; study appraisal and synthesis methods; results; limitations; conclusions and implications of key findings; systematic review registration number. | P2-3               |
| <b>INTRODUCTION</b>                |    |                                                                                                                                                                                                                                                                                                             |                    |
| Rationale                          | 3  | Describe the rationale for the review in the context of what is already known.                                                                                                                                                                                                                              | P5-6               |
| Objectives                         | 4  | Provide an explicit statement of questions being addressed with reference to participants, interventions, comparisons, outcomes, and study design (PICOS).                                                                                                                                                  | P6                 |
| <b>METHODS</b>                     |    |                                                                                                                                                                                                                                                                                                             |                    |
| Protocol and registration          | 5  | Indicate if a review protocol exists, if and where it can be accessed (e.g., Web address), and, if available, provide registration information including registration number.                                                                                                                               | P6                 |
| Eligibility criteria               | 6  | Specify study characteristics (e.g., PICOS, length of follow-up) and report characteristics (e.g., years considered, language, publication status) used as criteria for eligibility, giving rationale.                                                                                                      | P7-8               |
| Information sources                | 7  | Describe all information sources (e.g., databases with dates of coverage, contact with study authors to identify additional studies) in the search and date last searched.                                                                                                                                  | P6-7               |
| Search                             | 8  | Present full electronic search strategy for at least one database, including any limits used, such that it could be repeated.                                                                                                                                                                               | Table S1           |
| Study selection                    | 9  | State the process for selecting studies (i.e., screening, eligibility, included in systematic review, and, if applicable, included in the meta-analysis).                                                                                                                                                   | P9                 |
| Data collection process            | 10 | Describe method of data extraction from reports (e.g., piloted forms, independently, in duplicate) and any processes for obtaining and confirming data from investigators.                                                                                                                                  | P9                 |
| Data items                         | 11 | List and define all variables for which data were sought (e.g., PICOS, funding sources) and any assumptions and simplifications made.                                                                                                                                                                       | P9                 |
| Risk of bias in individual studies | 12 | Describe methods used for assessing risk of bias of individual studies (including specification of whether this was done at the study or outcome level), and how this information is to be used in any data synthesis.                                                                                      | P10                |
| Summary measures                   | 13 | State the principal summary measures (e.g., risk ratio, difference in means).                                                                                                                                                                                                                               | P10                |
| Synthesis of results               | 14 | Describe the methods of handling data and combining results of studies, if done, including measures of consistency (e.g., $I^2$ ) for each meta-analysis.                                                                                                                                                   | P9-10              |

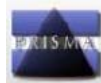

# PRISMA 2009 Checklist

Page 1 of 2

| Section/topic                 | #  | Checklist item                                                                                                                                                                                           | Reported on page #  |
|-------------------------------|----|----------------------------------------------------------------------------------------------------------------------------------------------------------------------------------------------------------|---------------------|
| Risk of bias across studies   | 15 | Specify any assessment of risk of bias that may affect the cumulative evidence (e.g., publication bias, selective reporting within studies).                                                             | P10                 |
| Additional analyses           | 16 | Describe methods of additional analyses (e.g., sensitivity or subgroup analyses, meta-regression), if done, indicating which were pre-specified.                                                         | P10                 |
| <b>RESULTS</b>                |    |                                                                                                                                                                                                          |                     |
| Study selection               | 17 | Give numbers of studies screened, assessed for eligibility, and included in the review, with reasons for exclusions at each stage, ideally with a flow diagram.                                          | P11<br>Fig.1        |
| Study characteristics         | 18 | For each study, present characteristics for which data were extracted (e.g., study size, PICOS, follow-up period) and provide the citations.                                                             | P11-12<br>Table1, 2 |
| Risk of bias within studies   | 19 | Present data on risk of bias of each study and, if available, any outcome level assessment (see item 12).                                                                                                | P12, Fig2           |
| Results of individual studies | 20 | For all outcomes considered (benefits or harms), present, for each study: (a) simple summary data for each intervention group (b) effect estimates and confidence intervals, ideally with a forest plot. | P12-16, Fig 3       |
| Synthesis of results          | 21 | Present results of each meta-analysis done, including confidence intervals and measures of consistency.                                                                                                  | P12-16,<br>Appendix |
| Risk of bias across studies   | 22 | Present results of any assessment of risk of bias across studies (see Item 15).                                                                                                                          | Table 3             |
| Additional analysis           | 23 | Give results of additional analyses, if done (e.g., sensitivity or subgroup analyses, meta-regression [see Item 16]).                                                                                    | P16-18<br>Appendix  |
| <b>DISCUSSION</b>             |    |                                                                                                                                                                                                          |                     |
| Summary of evidence           | 24 | Summarize the main findings including the strength of evidence for each main outcome; consider their relevance to key groups (e.g., healthcare providers, users, and policy makers).                     | P18-19              |
| Limitations                   | 25 | Discuss limitations at study and outcome level (e.g., risk of bias), and at review-level (e.g., incomplete retrieval of identified research, reporting bias).                                            | P21-22              |
| Conclusions                   | 26 | Provide a general interpretation of the results in the context of other evidence, and implications for future research.                                                                                  | P18-19,22-23        |
| <b>FUNDING</b>                |    |                                                                                                                                                                                                          |                     |
| Funding                       | 27 | Describe sources of funding for the systematic review and other support (e.g., supply of data); role of funders for the systematic review.                                                               | P24                 |

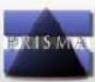

# PRISMA 2009 Checklist

- 1
- 2
- 3
- 4
- 5
- 6
- 7
- 8
- 9
- 10
- 11
- 12
- 13
- 14
- 15
- 16
- 17
- 18
- 19
- 20
- 21
- 22
- 23
- 24
- 25
- 26
- 27
- 28
- 29
- 30
- 31
- 32
- 33
- 34
- 35
- 36
- 37
- 38
- 39
- 40
- 41
- 42
- 43
- 44
- 45
- 46
- 47

For more information, visit: [www.prisma-statement.org](http://www.prisma-statement.org).

Page 2 of 2

For peer review only
