# Supplementary material for: Chinese herbal medicine for diabetic kidney disease: a systematic review and meta-analysis of randomised placebo-controlled trials
Source: PubMed Central journal article supplement — BMJ Open. 2019 May 1;9(4):e025653. doi: 10.1136/bmjopen-2018-025653 (PMC6501976; doi:10.1136/bmjopen-2018-025653), 2019-05-01
Supplement: bmjopen-2018-025653supp001.pdf [file bmjopen-2018-025653supp001.pdf]

# **Chinese Herbal Medicine for Diabetic Kidney Disease: A Systematic Review and Meta-analysis of Randomised Placebo-controlled Trials**

## **Supplementary Appendix**

Table S1: Search strategy of MEDLINE.

Table S2: Subgroup analysis of primary outcomes

Table S3: Meta-analysis results of secondary outcomes

Table S4: Sensitivity analysis of primary outcomes

**Table S1: Search Strategy of MEDLINE**

| Search Block | Search terms                                                                                                                                                                                                                                                                                                                                                                                                                                                   |
|--------------|----------------------------------------------------------------------------------------------------------------------------------------------------------------------------------------------------------------------------------------------------------------------------------------------------------------------------------------------------------------------------------------------------------------------------------------------------------------|
| Intervention | Traditional Chinese Medicine OR Chinese Traditional Medicine OR Chinese Herbal Drugs OR Chinese Drugs, Plant OR Medicine, Traditional OR Ethnopharmacology OR Ethnomedicine OR Ethnobotany OR Medicine, Kampo OR Kanpo OR TCM OR Medicine, Ayurvedic OR Phytotherapy OR Herbology OR Plants, Medicinal OR Plant Preparation OR Plant Extract OR Plants, Medicine OR Materia Medica OR Single Prescription OR Chinese Medicine Herb OR Herbal Medicine OR Herbs |
| Condition    | Diabetic Nephropathies OR Diabetic Nephropathy OR Diabetic Kidney Disease OR Diabetic Kidney Diseases OR Kimmelstiel Wilson Syndrome OR Kimmelstiel Wilson Disease OR Diabetic Glomerulosclerosis OR Nodular Glomerulosclerosis OR Intracapillary Glomerulosclerosis OR albuminuria OR Microalbuminuria OR proteinuria OR Glomerulosclerosis OR Glomerulonephritis OR Kimmelstiel wilson nephropathy OR diabetic nephrosclerosis                               |
| Study design | Systematic[sb] OR "randomized controlled trial"[pt] OR "controlled clinical trial"[pt] OR "randomized"[tiab] OR "placebo"[tiab] OR "drug therapy"[sh] OR "randomly"[tiab] OR "trial"[tiab] OR "groups"[tiab] OR "cohort studies"[mesh] OR "case-control studies"[mesh] OR "comparative study"[pt] OR "risk factors"[mesh] OR "cohort"[tw] OR "compared"[tw] OR "groups"[tw] OR "case control"[tw] OR "multivariate"[tw] OR "case series"[tw]                   |

Note: The three search blocks were connected with Boolean operators ‘AND’ to build the overall search terms.

**Table S2: Subgroup Analysis of Primary Outcomes**

| Outcome or Subgroup                                           | Studies | Pts | Statistical Method | Effect Estimate (95%CI)    | I <sup>2</sup> | p value  |
|---------------------------------------------------------------|---------|-----|--------------------|----------------------------|----------------|----------|
| <b>Urinary albumin excretion</b>                              |         |     |                    |                            |                |          |
| <i><b>Subgroup-CHM formulae</b></i>                           |         |     |                    |                            |                |          |
| Qiwei Granules                                                | 2       | 104 | MD                 | -70.06 [-88.84, -51.28]    | 0%             | p<0.0001 |
| Arctiin Granules                                              | 2       | 595 | Std. MD            | -0.38 [-0.56, -0.20]       | 0%             | p<0.0001 |
| Tang shen ning Formulae group                                 | 2       | 330 | MD                 | -48.16 [-55.12, -41.20]    | 95%            | p<0.0001 |
| <i><b>Subgroup-Measurements</b></i>                           |         |     |                    |                            |                |          |
| CHM vs placebo-AER                                            | 1       | 186 | MD                 | -149.48 [-362.79, 63.83]   | NA             | p=0.17   |
| CHM vs placebo-ACR                                            | 2       | 124 | MD                 | -30.53 [-76.59, 15.53]     | 66%            | p=0.19   |
| CHM vs placebo-UAE                                            | 5       | 711 | MD                 | -60.91 [-76.82, -45.01]    | 53%            | p<0.0001 |
| CHM vs placebo + ACEi/ARB-AER                                 | 1       | 119 | MD                 | -48.85 [-53.30, -44.40]    | NA             | p<0.0001 |
| CHM vs placebo + ACEi/ARB-UAE                                 | 2       | 330 | MD                 | -48.16 [-55.12, -41.20]    | 95%            | p<0.0001 |
| <b>24-hour proteinuria</b>                                    |         |     |                    |                            |                |          |
| <i><b>Subgroup-baseline UP</b></i>                            |         |     |                    |                            |                |          |
| CHM vs placebo-baseline UP < 0.5g/d                           | 2       | 453 | MD                 | -378.34 [-649.90, -106.77] | 63%            | p=0.006  |
| CHM vs placebo-baseline UP > 0.5g/d                           | 2       | 246 | Std. MD            | -1.49 [-3.97, 0.99]        | 97%            | p=0.24   |
| CHM + ACEi/ARB vs placebo + ACEi/ARB<br>-baseline UP < 0.5g/d | 2       | 284 | MD                 | -31.30 [-68.61, 6.02]      | 61%            | p=0.10   |
| CHM + ACEi/ARB vs placebo + ACEi/ARB<br>-baseline UP > 0.5g/d | 2       | 205 | MD                 | 0.11 [-0.67, 0.88]         | 74%            | p=0.79   |
| <i><b>Subgroup-CHM formulae</b></i>                           |         |     |                    |                            |                |          |
| Qiwei Granules                                                | 2       | 104 | Std. MD            | -2.47 [-3.11, -1.83]       | 21%            | p<0.0001 |
| Arctiin Granules                                              | 2       | 595 | MD                 | -407.65 [-732.24, -83.05]  | 45%            | p=0.01   |
| Tang shen fang group                                          | 2       | 205 | MD                 | 0.11 [-0.67, 0.88]         | 74%            | p=0.79   |
| <i><b>Subgroup-Measurements</b></i>                           |         |     |                    |                            |                |          |
| CHM vs placebo-g/24h                                          | 1       | 60  | MD                 | -0.93 [-1.13, -0.73]       | NA             | p<0.0001 |
| CHM vs placebo-mg/24h                                         | 3       | 639 | MD                 | -324.42 [-485.15, -163.69] | 30%            | p<0.0001 |

|                                                             |   |     |    |                       |     |          |
|-------------------------------------------------------------|---|-----|----|-----------------------|-----|----------|
| CHM + ACEi/ARB vs placebo + ACEi/ARB-g/24h                  | 2 | 205 | MD | 0.11 [-0.67, 0.88]    | 74% | p=0.79   |
| CHM + ACEi/ARB vs placebo + ACEi/ARB-mg/24h                 | 2 | 284 | MD | -31.30 [-68.61, 6.02] | 61% | p=0.10   |
| <b>Serum creatinine level</b>                               |   |     |    |                       |     |          |
| <i><b>Subgroup-baseline Scr</b></i>                         |   |     |    |                       |     |          |
| CHM + ACEi/ARB vs placebo + ACEi/ARB -baseline Scr normal   | 3 | 227 | MD | -2.12 [-6.48, 2.23]   | 0%  | p=0.34   |
| CHM + ACEi/ARB vs placebo + ACEi/ARB -baseline Scr abnormal | 2 | 368 | MD | -9.99 [-17.71, -2.26] | 0%  | p=0.01   |
| CHM vs placebo + ACEi/ARB-baseline Scr normal               | 3 | 434 | MD | -4.07 [-6.13, -2.01]  | 0%  | p=0.0001 |
| CHM vs placebo + ACEi/ARB-baseline Scr abnormal             | 1 | 156 | MD | -2.84 [-18.18, 12.50] | NA  | p=0.72   |
| <i><b>Subgroup-CHM formulae</b></i>                         |   |     |    |                       |     |          |
| Tang shen fang group                                        | 2 | 286 | MD | -6.06 [-14.60, 2.47]  | 0%  | p=0.16   |
| Tang shen ning Formulae group                               | 2 | 330 | MD | -3.96 [-6.13, -1.78]  | 6%  | p=0.0004 |
| <b>Glomerular filtration rate</b>                           |   |     |    |                       |     |          |
| <i><b>Subgroup-baseline GFR</b></i>                         |   |     |    |                       |     |          |
| CHM + ACEi/ARB vs placebo + ACEi/ARB -baseline GFR>90       | 2 | 249 | MD | 9.38 [1.07, 17.70]    | 4%  | p=0.03   |
| CHM + ACEi/ARB vs placebo + ACEi/ARB -baseline GFR<90       | 2 | 286 | MD | 5.22 [0.69, 9.74]     | 0%  | p=0.02   |
| CHM vs placebo + ACEi/ARB-baseline GFR>90                   | 1 | 90  | MD | -9.99 [-13.62, -6.36] | NA  | p<0.0001 |
| CHM vs placebo + ACEi/ARB-baseline GFR<90                   | 3 | 452 | MD | 4.48 [-1.32, 10.28]   | 70% | p=0.13   |
| <i><b>Subgroup-CHM formulae</b></i>                         |   |     |    |                       |     |          |
| Tang shen fang group                                        | 2 | 286 | MD | 5.22 [0.69, 9.74]     | 0%  | p=0.02   |
| Tang shen ning Formulae group                               | 2 | 330 | MD | -0.89 [-18.62, 16.85] | 99% | p=0.92   |

| <i><b>Subgroup-Measurements</b></i>       |   |     |    |                      |     |        |
|-------------------------------------------|---|-----|----|----------------------|-----|--------|
| CHM + ACEi/ARB vs placebo + ACEi/ARB-Ccr  | 1 | 144 | MD | 5.80 [1.01, 10.59]   | NA  | p=0.02 |
| CHM + ACEi/ARB vs placebo + ACEi/ARB-eGFR | 3 | 391 | MD | 7.13 [-0.29, 14.56]  | 11% | p=0.06 |
| CHM vs placebo + ACEi/ARB-Ccr             | 2 | 246 | MD | -4.14 [-15.81, 7.53] | 93% | p=0.49 |
| CHM vs placebo + ACEi/ARB-eGFR            | 2 | 296 | MD | 5.25 [-4.65, 15.15]  | 46% | p=0.30 |

Abbreviation: Pts, patients; CI, confident interval; NA, not applicable. CHM, Chinese herbal medicine; ACEi, angiotensin converting enzyme inhibitors; ARB, angiotensin receptor blockers; MD, mean differences; Std, standard.; AER, albuminuria excretion rate; ACR, albuminuria to creatinine ratio; UAE, urinary albuminuria excretion; UP, urinary proteinuria; GFR, glomerular filtration rate; Scr, serum creatinine concentration; Ccr, creatinine clearance.

**Table S3 Meta-analysis Results of Secondary Outcomes**

| <b>Outcome</b>                 | <b>Studies</b> | <b>Participants</b> | <b>Effect Estimate<br/>(95% CI)</b> | <b>I<sup>2</sup></b> | <b>p value</b> |
|--------------------------------|----------------|---------------------|-------------------------------------|----------------------|----------------|
| Fasting blood sugar            | 9              | 962                 | -0.45 [-1.15, 0.25]                 | 93%                  | p=0.21         |
| Haemoglobin A1c                | 8              | 901                 | 0.04 [-0.17, 0.24]                  | 59%                  | p=0.73         |
| Total cholesterol              | 8              | 815                 | -0.96 [-1.70, -0.21]                | 95%                  | p=0.01         |
| Triglyceride                   | 8              | 815                 | -0.60 [-1.01, -0.19]                | 90%                  | p=0.004        |
| Low-density lipoprotein        | 7              | 696                 | -0.51 [-0.93, -0.09]                | 92%                  | p=0.02         |
| High-density lipoprotein       | 8              | 815                 | 0.14 [-0.04, 0.33]                  | 93%                  | p=0.12         |
| Systolic blood pressure        | 3              | 252                 | 0.64 [-0.90, 2.17]                  | 0%                   | p=0.43         |
| Diastolic blood pressure       | 3              | 252                 | 0.14 [-2.02, 2.29]                  | 52%                  | p=0.90         |
| Diabetes quality of life score | 2              | 461                 | 0.07 [-3.87, 4.00]                  | 54%                  | p=0.97         |

Note: All outcomes analysed with mean difference. Abbreviation: CI, confident interval

**Table S4: Sensitivity Analysis of Primary Outcomes**

| Outcomes                          | Studies | Participants | Statistical Method   | Effect Estimate (95% CI)  | I <sup>2</sup> | p value  |
|-----------------------------------|---------|--------------|----------------------|---------------------------|----------------|----------|
| <b>Urinary albumin excretion</b>  |         |              |                      |                           |                |          |
| CHM vs placebo                    | 4       | 798          | Std. Mean Difference | -0.54 [-0.85, -0.22]      | 73%            | p=0.0009 |
| CHM+ACEi/ARB vs placebo+ACEi/ARB  | 3       | 330          | Std. Mean Difference | -0.56 [-1.04, -0.08]      | 64%            | p=0.02   |
| <b>24-hour proteinuria</b>        |         |              |                      |                           |                |          |
| CHM vs placebo                    | 2       | 595          | Mean Difference      | -407.65 [-732.24, -83.05] | 45%            | p=0.01   |
| CHM+ACEi/ARB vs placebo+ACEi/ARB  | 3       | 429          | Std. Mean Difference | -0.12 [-0.60, 0.37]       | 81%            | p=0.63   |
| CHM vs placebo+ACEi/ARB           | 2       | 260          | Std. Mean Difference | 0.00 [-0.32, 0.32]        | 26%            | p=1.00   |
| <b>Serum creatinine level</b>     |         |              |                      |                           |                |          |
| CHM vs placebo                    | 1       | 41           | Mean Difference      | 10.31 [-2.26, 22.88]      | NA             | p=0.11   |
| CHM+ACEi/ARB vs placebo+ACEi/ARB  | 4       | 535          | Mean Difference      | -5.59 [-10.61, -0.58]     | 0%             | p=0.03   |
| CHM vs placebo+ACEi/ARB           | 2       | 260          | Mean Difference      | -6.23 [-19.51, 7.05]      | 0%             | p=0.36   |
| <b>Glomerular filtration rate</b> |         |              |                      |                           |                |          |
| CHM+ACEi/ARB vs placebo+ACEi/ARB  | 4       | 535          | Mean Difference      | 6.28 [2.42, 10.14]        | 0%             | p=0.001  |
| CHM vs placebo+ACEi/ARB           | 2       | 212          | Mean Difference      | 1.50 [-3.08, 6.09]        | 0%             | p=0.52   |

Abbreviation: NA, not applicable. CHM, Chinese herbal medicine; ACEi, angiotensin converting enzyme inhibitors; ARB, angiotensin receptor blockers; Std, standard
